# Supplementary material for: Genome-Wide DNA Methylation and Gene Expression Analyses of Monozygotic Twins Discordant for Intelligence Levels
Source: PLoS One. 2012 Oct 17;7(10):e47081. doi: 10.1371/journal.pone.0047081 (PMC3474830; doi:10.1371/journal.pone.0047081)
Supplement: Dataset S1 — Pair-wise comparison of expression array data. Genes with a fold-change value >2 were included. The positive value of fold-change designates up-regulation in the higher IQ twin, while the negative value designates the other way round. n/a indicates no gene matched the fold-change cutoff value. (XLS) [file pone.0047081.s001.xls]

## Sheet: Higher IQ twins
twin pair ID 1			twin pair ID 2			twin pair ID 3			twin pair ID 4			twin pair ID 5			twin pair ID 6			twin pair ID 7			twin pair ID 8			twin pair ID 9			twin pair ID 10			twin pair ID 11			twin pair ID 12			twin pair ID 13			twin pair ID 14			twin pair ID 15			twin pair ID 16			twin pair ID 17
Gene	Fold change (higher vs lower)		Gene	Fold change (higher vs lower)		Gene	Fold change (higher vs lower)		Gene	Fold change (higher vs lower)		Gene	Fold change (higher vs lower)		Gene	Fold change (higher vs lower)		Gene	Fold change (higher vs lower)		Gene	Fold change (higher vs lower)		Gene	Fold change (higher vs lower)		Gene	Fold change (higher vs lower)		Gene	Fold change (higher vs lower)		Gene	Fold change (higher vs lower)		Gene	Fold change (higher vs lower)		Gene	Fold change (higher vs lower)		Gene	Fold change (higher vs lower)		Gene	Fold change (higher vs lower)		Gene	Fold change (higher vs lower)
DPP4	3.37324		IGKV3D-11	13.067		IGLV7-46	4.77688		IGKC	4.1166		C14orf105	5.14977		GLYATL2	4.45266		IGK@	3.53248		UCHL1	3.09131		IGLV7-46	49.031		IGKV3D-11	4.61396		IGLV7-46	40.1638		LOC652493	14.7645		TSPAN7	3.45348		CDRT1	3.1894		TBX15	7.61789		IGLV7-46	8.33625		IGKC	6.68802
ARMCX1	3.21319		GTSF1	7.38565		SNORA22	2.90611		TDRD1	3.35419		CDC42BPA	4.57377		RPS6KA6	4.2345		CDC42BPA	3.42082					SNORA23	4.97422		LOC391742	3.6219		TDRD12	17.8128		SNORA20	10.4244		IGLV6-57	3.38937		DPP4	2.93889		UCHL1	5.51536		LOC100289528	2.55277		LOC652493	3.81926
GLB1L2	3.02982		IGK@	6.614		AK3L1	2.73942		LOC100289528	2.77317		DACT1	3.67508		HPGDS	3.54082		IGKC	3.07372					ZNF730	3.57598		SNORD37	3.22708		GTSF1	8.20975		SNORD104	5.79403		CDR1	2.6904		MYO3B	2.83042		CXCR4	3.29412		LOC100289528	2.55277		IGLV7-46	3.54473
ROBO1	2.74662		IGKC	5.37494		CD200R1	2.6258		LOC100289528	2.77317		GAS2	3.43837		VNN1	3.26565		CAPN2	3.00598					NETO1	3.44763		TMEM229A	3.17485		VSIG6	8.05666		SNORD45B	5.66926		SEPT10	2.41813		GTSF1	2.67054		SEPT10	2.85031		GPR125	2.50344		PLA2G4A	2.89086
GTSF1	2.50728		IGLV6-57	4.98557		SNORA23	2.6143		LOC440944	2.72764		HNF1B	3.42928		ANXA1	3.20871		AMICA1	2.87245					LOC100288114	3.30708		FMN1	3.1597		SLCO4C1	6.63608		HIST1H2BB	3.92276		DDR2	2.25735		RNF130	2.53385		ILDR2	2.74365		BCORL2	2.20096		SLCO4C1	2.80125
LRP12	2.42833		IGK@	4.31348		DENND1B	2.42824					PLXDC2	3.08207		C1orf162	3.10529		IGK@	2.82211					CLLU1	3.14672		NUDT12	3.10759		DSG2	5.27379		SNORD59B	3.82643		GPR125	2.0886		SLCO4C1	2.36361		CXCL10	2.70392		LOC644714	2.13581		PRKCH	2.66866
ZNF487	2.27205		THBS1	4.1971		FAM153C	2.39748					LMO3	3.03393		ZNF300	2.84674		C3orf14	2.73542					NUDT12	3.14169		FLJ16171	2.94183		CD177	4.38103		RNU5A	3.78007		SNORD57	2.07517		NETO1	2.27736		CDC42BPA	2.69344		LOC644714	2.12766		FAM169A	2.63145
SNAI2	2.17117		RHOBTB3	4.09749		TOX	2.34218					EPS8	2.92373		NAP1L2	2.7333		CYP7B1	2.70835					CDRT1	3.0952		IGK@	2.92144		FAM99A	4.10747		SNORA71A	3.77934		DERL3	2.05442		OR2J1	2.2427		CD96	2.62545		C5orf36	2.02916		TOX	2.5003
L3MBTL4	2.12133		ROBO1	4.01999		TDRD1	2.33919					POF1B	2.79146		SNORA38B	2.72863		CYP1B1	2.50985					NRCAM	2.82276		SLC25A21	2.69487		C3orf59	4.00532		SNORA24	3.73019		SNORD116-12	2.03042		ARMCX1	2.2359		RBMY1A1	2.56002		GTSF1	2.01586		IGKC	2.49596
LRIG3	2.09871		FLJ25715	3.86834		CCL1	2.29045					OR5H14	2.7907		BEX4	2.72613		FAM169A	2.48258					AK3L1	2.82202		IGK@	2.53498		TRERF1	4.00139		SNORA21	3.70698		DUSP5P	2.02396		PRKCH	2.20276		RHOU	2.51134		LOC100288962	2.0015		PAR5	2.41917
SNORA13	2.08247		PRKCH	3.58157		GLUD1	2.24807					CXCL10	2.78628		RNU5A	2.69832		NCALD	2.34742					CD177	2.8073		SNORD116-25	2.16189		ST3GAL6	3.48067		SNORA68	3.68117		VSIG6	2.02198		ZNF487	2.2019		TINAG	2.32972					RALGAPA1	2.29929
PLA2G10	2.07353		TMEM229A	3.5617		SNORA38B	2.22742					LRRC16A	2.76585		SAA1	2.64451		IGF1	2.32804					FLJ45825	2.63208		MX2	2.14413		TDRD1	3.47893		RMRP	3.62533		SNORD13P1	2.01576		FLJ32742	2.11795		CD244	2.18766					AGPAT9	2.23891
AK3L1	2.05971		KIAA1324L	3.54509		SNORD45B	2.21143					NCKAP5	2.74417		MIR146A	2.60391		GTSF1	2.31885					THNSL1	2.63074		VSIG6	2.1384		SEPT10	3.47859		HIST1H2AB	3.47175		OR52B6	2.00308		TM6SF1	2.08977		GTSF1	2.16966					IGKC	2.22811
LGALS14	2.03369		FLJ16171	3.48797		TXNIP	2.19231					SPIC	2.73		LOC285456	2.60154		RNU5A	2.25583					TOX	2.62676		CDRT1	2.12083		C20orf203	3.38929		BIRC3	3.3485					LOC285456	2.03252		FERMT2	2.14805					AK3L1	2.18481
			TMOD1	3.42487		DENND1B	2.11184					TINAG	2.59395		GLT1D1	2.57083		TPTE2	2.2009					BCAS1	2.56584		SNORA20	2.08682		UGT2B7	3.22554		ANKRD32	3.32502					C21orf94	2.02493		LRIG3	2.08223					EFTUD1	2.10917
			EPCAM	3.33624		LEPREL1	2.10465					CXCR4	2.49585		TMEM232	2.56723		FOXP1	2.19024					KIAA0125	2.53675		SNORD59B	2.04247		TRERF1	3.2153		DHX37	3.17214								EPS8	2.07852					OR5H14	2.08392
			LCN1	3.32735		NCRNA00116	2.09893					HLA-DQA1	2.43814		CD72	2.56089		HTR2B	2.17285					TFEC	2.5042		GCLM	2.02217		UCHL1	3.16204		IGKC	3.16678								HNF1B	2.04753					TNFSF10	2.06733
			CYP1B1	3.29867		FAM24A	2.08851					ITGB8	2.38687		EFHA2	2.4768		WNT5A	2.16579					UCHL1	2.47652		CLC	2.00015		GRAP2	2.97227		SNORA37	3.11649								ATP1B1	2.03927					DPP4	2.04567
			FLJ25758	3.13338		SNORA20	2.06401					ATP1B1	2.28772		GOLGA8B	2.46331		C9orf21	2.15681					PKP4	2.46338					MYO3B	2.94722		SCARNA6	3.11461								PARD3	2.00917					CXCL10	2.02276
			LRRFIP1	3.0645		FLJ35409	2.06049					GPAM	2.26696		SNORD82	2.45831		NLRP2	2.15138					SNORD75	2.39478					SLFN12L	2.90685		SNORA16A	2.97258														TNFRSF9	2.01212
			IGKV4-1	3.0249		IFITM3	2.00162					LEF1	2.22382		ITGAX	2.43598		TSPAN5	2.12824					NPNT	2.36812					AK3L1	2.81802		SNRPA1	2.95352														ANKRD32	2.00894
			MIR27B	2.98855								ACPP	2.11016		SNORD116-25	2.42504		MYO6	2.1109					SNORA38B	2.36805					PSMA8	2.81462		SNORA2A	2.93848														FLJ42875	2.00493
			ZNF804A	2.83254								GPAM	2.03129		LOC644714	2.40456		CHL1	2.1095					PRKCH	2.35844					LGALS1	2.76597		MIF	2.88966														EEPD1	2.00158
			C20orf103	2.7046								PMCHL1	2.01937		CCRL1	2.36955		LEF1	2.06552					GLB1L2	2.32596					VSIG6	2.71692		SIAE	2.87049
			HTR3C	2.67405								DAAM2	2.01871		CTTN	2.29651		LMO3	2.05235					TEX15	2.30992					CRY1	2.69902		COX7A2	2.86833
			PAK1	2.63849								OCR1	2.01545		SNORD116-6	2.29105		NBPF22P	2.03627					RIMBP2	2.30298					EPB41L4A	2.69681		SNORA52	2.86504
			FAM48B2	2.61649											SNORD116-24	2.28618		LOC100289385	2.03597					GSTM5	2.30146					TGFBR3	2.62544		SNORD15B	2.8378
			FAM48B2	2.61649											GOLGA8B	2.27252		LOC100289385	2.03597					POM121L1P	2.29992					HP	2.60575		RCHY1	2.82925
			GPR32	2.5827											GYPE	2.26636		IGKV3D-11	2.02704					POM121L1P	2.29992					GLB1L2	2.57127		SNORD20	2.81632
			ATP1B2	2.56398											MIR1977	2.23051								psiTPTE22	2.2918					PKP2	2.50145		SCARNA13	2.75876
			CALCB	2.54107											MIR1977	2.23051								ROBO1	2.28906					NPNT	2.49813		RPL24	2.68832
			LYPD6B	2.53263											ZNF487	2.22618								TBC1D30	2.28565					TLE1	2.4708		NCOR2	2.61927
			CCR4	2.52146											IL1A	2.2034								SNORD30	2.27864					PRKCH	2.43636		FLJ31958	2.58147
			TEX15	2.51627											MIR186	2.19979								RNU5D	2.26828					UTS2D	2.36913		SNORD105	2.53366
			VSIG6	2.50813											SCARNA23	2.19595								DOCK9	2.2595					VIM	2.36563		SEL1L3	2.52438
			C19orf77	2.46639											NNAT	2.18845								TRERF1	2.25671					C20orf103	2.35721		MALAT1	2.5242
			MIR132	2.46298											TUBB2B	2.16926								PAR5	2.25426					SLFN11	2.35048		LOC652493	2.50877
			MIR339	2.45866											C13orf18	2.16656								HECW2	2.23367					CXCR3	2.32878		MIR186	2.49847
			SLC25A27	2.45734											ZNF711	2.16128								PEG10	2.21788					S100A11	2.32849		SNORA14B	2.44533
			KRTAP4-3	2.44145											DBN1	2.15481								PSTPIP2	2.21373					LOC151009	2.29897		AAMP	2.41804
			PRLHR	2.42716											GOLGA6A	2.1038								SNORD74	2.21112					EFR3B	2.27083		SNORA73A	2.4149
			GPAT2	2.42338											CLEC4C	2.10239								BCAT1	2.20068					MCART1	2.25295		IGK@	2.39848
			C1orf210	2.42013											SNORD29	2.07112								SNORD12C	2.18747					FLJ32742	2.24029		RPL24	2.32587
			PHLDB2	2.41487											EPCAM	2.0693								SNORD38B	2.1799					PDE3B	2.22642		LYPLAL1	2.31221
			DUSP26	2.40691											TM6SF1	2.06642								SETD7	2.17581					TMTC1	2.21689		UBE2MP1	2.29893
			LOC150527	2.38208											SNORA20	2.06331								TMOD1	2.16637					GLDC	2.18781		IQCA1L	2.28136
			LOC150527	2.38208											ZNF285	2.05495								GLT1D1	2.15271					ZNF443	2.17349		SNORD116-27	2.27884
			PTCH1	2.38148											LCN8	2.0446								SNORD73A	2.15172					CAPN2	2.16769		LOC100130100	2.27162
			OR6T1	2.37709											FAM92A2	2.03705								SNORD51	2.15132					TMEM56	2.1609		OR5H14	2.26815
			CXCR5	2.36641											ALOX5AP	2.03397								SNORD15B	2.1201					ARHGAP21	2.16083		LPAR6	2.24869
			SHOX2	2.35863											SNORD116-1	2.02691								KIR3DL1	2.11037					CDRT1	2.15993		SDAD1	2.24465
			SNAI2	2.35199											SNORA22	2.01502								LRIG3	2.10409					BCORL2	2.14619		SNORA7B	2.22995
			C1QL4	2.35004											ZNF767	2.01115								CRY1	2.10003					LOC100289528	2.13028		SNORA57	2.22552
			LRRC4B	2.33964											SNORD116-26	2.01056								GLDC	2.09358					LOC100289528	2.13028		NETO1	2.1979
			ZNF608	2.33638																				OR10H2	2.08257					SNORD56B	2.12359		SLC47A1	2.16929
			TRBV21OR9-2	2.32144																				SYCP2	2.07222					ADD2	2.12267		SNORD116-25	2.14947
			CRNN	2.31481																				KLF3	2.0627					ALDH1A1	2.1148		RNU1-1	2.13567
			C14orf166B	2.31075																				AGPAT9	2.05575					SSX9	2.10824		RNU1-1	2.13567
			ENPP7	2.31068																				SNORD43	2.01789					SPAG6	2.09377		DCUN1D1	2.11759
			PDYN	2.3103																				IGKV3D-11	2.01765					SEPT3	2.09353		SNORD101	2.11242
			GPIHBP1	2.3055																				SNORD42B	2.0115					SHROOM3	2.0822		SNORD77	2.07283
			SPATA18	2.30399																				IL18	2.01108					GPAT2	2.0819		RNU1-1	2.05474
			INPP4B	2.30122																				F2R	2.00633					MCTP1	2.07549		RNU1-1	2.05474
			RD3	2.29821																				TIMM8A	2.0048					PLCL1	2.069		OR51A7	2.00699
			BDNF	2.29332																										RAB31	2.06829
			LOC84856	2.28828																										CD9	2.06493
			GPRC5B	2.28766																										MCC	2.05646
			AGPAT9	2.28669																										CYP3A4	2.03973
			SLC5A10	2.28166																										UACA	2.03779
			WIPF3	2.2709																										FCGR2A	2.02817
			LOC389634	2.25413																										FCGR2C	2.02455
			TLX2	2.24787																										APBB2	2.02195
			SORT1	2.24012
			CHRNB4	2.23753
			CRHR2	2.23644
			S100A7L2	2.23487
			IHH	2.2345
			AOC3	2.23315
			PACRG	2.23038
			SPDYE3	2.22819
			MRGPRX3	2.22716
			TMEM150B	2.22407
			CECR4	2.22142
			TNFSF4	2.21759
			KRT18	2.21375
			LGALS3BP	2.20922
			CADM1	2.20789
			CR2	2.20674
			USP17L2	2.20659
			HTR2B	2.19863
			C19orf71	2.19531
			AKR1C1	2.19248
			C20orf71	2.19237
			LOC652493	2.18367
			PLTP	2.18336
			FMN1	2.18326
			CDRT1	2.17903
			EHBP1L1	2.17404
			KRT8	2.17171
			DPEP3	2.17071
			LOC149837	2.17051
			IL12B	2.16944
			BACE2	2.16908
			GAL3ST4	2.16811
			IGF1	2.16687
			LOC441956	2.16528
			CSRP2	2.16373
			EMILIN3	2.15992
			NPBWR2	2.15923
			KLK10	2.15851
			CES1	2.15832
			CTU1	2.1579
			MIR326	2.15722
			SYT5	2.15649
			PLIN4	2.15518
			VWC2L	2.15512
			ADCY1	2.1549
			HNF1A	2.15443
			FGR	2.15399
			MSX1	2.15095
			MIR138-1	2.14601
			KIAA1210	2.14466
			KLF3	2.14249
			CCDC85C	2.13992
			LY6G6E	2.13991
			LY6G6E	2.13991
			LY6G6E	2.13991
			LOC440905	2.1389
			MLPH	2.13689
			DOC2B	2.13491
			LOC100128355	2.13408
			LEPREL1	2.13192
			KLF7	2.12817
			MFSD2B	2.1275
			SLC30A2	2.12613
			C11orf41	2.12313
			OR10AD1	2.12284
			SIGLEC6	2.1223
			AMBP	2.12079
			C17orf59	2.11661
			PRRT2	2.11589
			LRIG3	2.11076
			FLJ16734	2.10992
			FAM108A1	2.10932
			MIR219-1	2.10805
			FLJ45825	2.10538
			PSG4	2.10446
			LOC100131581	2.10362
			EFNB3	2.10297
			GPR109A	2.10212
			FLJ43860	2.09814
			HBG2	2.09055
			HBG1	2.09055
			C20orf152	2.08783
			KDM5B	2.08212
			CCND1	2.08091
			TTTY10	2.079
			IL2RA	2.07877
			TUSC1	2.07646
			SLC5A9	2.07557
			FLJ11235	2.07403
			SIGLEC15	2.07366
			GDF2	2.07063
			CYP2B6	2.0699
			SIRPA	2.06827
			F2R	2.06743
			DLX4	2.06544
			VSTM2L	2.0647
			ITGB1BP3	2.06313
			ADRB2	2.06126
			LCN10	2.06058
			SBK2	2.05961
			CDC42EP1	2.05953
			TPBG	2.05939
			CHST10	2.05735
			SLC19A3	2.05672
			TNNI3	2.0558
			CMKLR1	2.05517
			NNMT	2.05477
			C9orf4	2.05436
			GRASP	2.05409
			NCCRP1	2.05312
			KIAA1654	2.05019
			TPSD1	2.04895
			CDH2	2.04856
			PTPRN2	2.04755
			MYOF	2.04592
			FUT5	2.04285
			LOC441233	2.04208
			NRIP3	2.04087
			ZNF536	2.04031
			VWA5B2	2.03881
			RUNX1	2.03842
			SNORA80B	2.03811
			ABO	2.03686
			C10orf114	2.03632
			DRD5	2.03562
			ATP7B	2.03543
			RBMY1A1	2.0343
			IL1R2	2.0343
			NHLRC4	2.03423
			MSLNL	2.03382
			USP17L2	2.03146
			CHRD	2.03117
			ZNF683	2.02996
			IGDCC3	2.02935
			JPH4	2.02835
			TRIM67	2.02525
			NLRP10	2.0237
			LRTM2	2.02281
			GPA33	2.02199
			C2CD4A	2.02127
			MUC12	2.0211
			ELN	2.02095
			C7orf34	2.02067
			FHL1	2.0201
			CSAG1	2.01776
			SYNPO2	2.01704
			GAGE12B	2.01531
			CLEC12B	2.01482
			GDF15	2.01176
			OPN1SW	2.01065
			RNF165	2.00855
			RBMXL3	2.00592
			LOC100132686	2.00506
			PRB3	2.00428
			KRTAP10-10	2.00349
			OR4D10	2.0033
			ESPNP	2.00299
			FAM83C	2.00236
			MFAP4	2.00077

## Sheet: Lower IQ twins
twin pair ID 1			twin pair ID 2			twin pair ID 3			twin pair ID 4			twin pair ID 5			twin pair ID 6			twin pair ID 7			twin pair ID 8			twin pair ID 9			twin pair ID 10			twin pair ID 11			twin pair ID 12			twin pair ID 13			twin pair ID 14			twin pair ID 15			twin pair ID 16			twin pair ID 17
Gene	Fold change (higher vs lower)		Gene	Fold change (higher vs lower)		Gene	Fold change (higher vs lower)		Gene	Fold change (higher vs lower)		Gene	Fold change (higher vs lower)		Gene	Fold change (higher vs lower)		Gene	Fold change (higher vs lower)		Gene	Fold change (higher vs lower)		Gene	Fold change (higher vs lower)		Gene	Fold change (higher vs lower)		Gene	Fold change (higher vs lower)		Gene	Fold change (higher vs lower)		Gene	Fold change (higher vs lower)		Gene	Fold change (higher vs lower)		Gene	Fold change (higher vs lower)		Gene	Fold change (higher vs lower)		Gene	Fold change (higher vs lower)
IGKC	-7.87579		IGLV7-46	-9.09656		SNORD13P2	-2.65645		KIR2DL3	-4.11353		IGKC	-5.69539		IGLV7-46	-37.4919		C20orf103	-8.43024					LMO3	-22.8169		IGLV7-46	-59.3253		THBS1	-7.04387		ROBO1	-4.38236		IGKC	-7.0735		IGKC	-31.3722		IGKC	-12.5157		IGLV6-57	-3.58105		C21orf94	-4.17415
CXCL10	-5.70792		GAS2	-7.53953		PTGS1	-2.61172		GAS2	-2.77437		IGLV7-46	-3.61194		IGKC	-11.3893		CCR2	-3.70066		n/a			C1orf161	-16.2314		SEPT10	-6.47834		VNN1	-5.75682		AREG	-3.53463		TEX15	-3.5086		IGKC	-4.69703		LOC652493	-7.27128		EPS8	-2.90468		EFNA5	-3.32901
PNLDC1	-2.98208		MUC13	-7.37607		MGC39584	-2.31186		RNF180	-2.59822		TDRD1	-2.62545		CXCL10	-10.753		IRAK3	-3.63311					ACPP	-11.562		RGS13	-4.68881		PXDN	-4.1916		ATF1	-2.98038		LOC652493	-3.37027		IGLV7-46	-3.66189		KIR2DL3	-3.95576		GPR32	-2.65239		GTSF1	-2.99877
LOC652493	-2.94704		STEAP1	-7.18558		CD177	-2.20874		KIR3DL2	-2.56089		LGALS14	-2.20257		IGKV4-1	-8.89498		ARRB1	-3.32686					CDC42BPA	-10.7646		IGKC	-4.46499		BANK1	-3.45467		CYP4Z2P	-2.94581		SNORD13P2	-2.69081		IGKC	-2.83474		IGKC	-3.41201		PLXDC2	-2.31094		FLJ38379	-2.72289
FMN1	-2.90247		SUCNR1	-6.60651		LOC100289385	-2.18631		LRRC16A	-2.52463		OR52N4	-2.01983		IGKC	-8.04681		FAM101B	-3.23829					C14orf105	-9.79564		RBMY1A1	-4.39098		LRRK2	-3.34756		TDP2	-2.87827		IGLV7-46	-2.65793		CADM1	-2.58396		LOC652493	-3.12032		GPC4	-2.19404		CDRT1	-2.57702
CDC42BPA	-2.69771		RGS13	-6.11442		LOC100289385	-2.18631		CD96	-2.4531					GZMK	-6.75263		SMAD1	-3.16703					GPR125	-8.87467		LOC652493	-3.79966		IL2RA	-3.26457		OCLN	-2.80012		IL1A	-2.53631		CXCR4	-2.54084		IGKV3D-11	-2.99893		SDCCAG1	-2.073		RBMY1A1	-2.20445
CD96	-2.35363		PLS3	-5.60986		EPHB1	-2.09798		CACNB2	-2.34915					NPNT	-6.24423		GRAP2	-2.83671					HNF1B	-7.84471		CYP4Z2P	-3.71185		TTLL7	-3.16648		SPIN1	-2.78275		TMPRSS3	-2.51484		ALDH7A1	-2.48668		NRIP1	-2.85499		FAM48B2	-2.06729		LHB	-2.09159
XCL2	-2.34951		CDC42BPA	-5.54656		SEPT14	-2.06143		TMEM2	-2.28504					TJP1	-6.06857		PECAM1	-2.6409					WFDC2	-6.9084		OR52K3P	-3.29601		SNORD116-18	-3.11601		SPRYD5	-2.74084		IGKC	-2.50739		IGKV3D-11	-2.47815		IGKC	-2.84834		FAM48B2	-2.06729		FMN1	-2.08897
GPR34	-2.32138		RNU5B-1	-5.25043		PXDN	-2.04776		SNORA20	-2.09372					SLC35D2	-5.59965		FLJ44896	-2.52611					CHL1	-6.40914		OR5H14	-3.28172		KLRK1	-2.7707		MRPL46	-2.73822		OCR1	-2.32921		LOC100129278	-2.43882		IGK@	-2.84828		LOC652493	-2.04449		PXDN	-2.05247
IGKC	-2.28082		LOC644714	-5.19069		LOC100289528	-2.03761								LRRC16A	-4.97937		AIF1	-2.46198					PLXDC2	-6.19235		EPS8	-2.91072		RAB38	-2.75508		KDELR3	-2.66335		DAPK1	-2.30361		TDGF3	-2.2862		TRIM49	-2.64703		OR2T6	-2.04279
LOC284861	-2.17543		LOC90925	-5.14355		LOC100289528	-2.03761								CXCL9	-4.92463		AIF1	-2.46198					KCTD14	-6.15999		ITGB8	-2.78167		LOC652493	-2.60406		AREG	-2.5875		NLRP11	-2.29388		ENAM	-2.20799		RHOBTB3	-2.63829
LPAR6	-2.14292		LOC644714	-5.12698		PLXDC2	-2.02648								MCTP1	-4.47594		AIF1	-2.46198					TBX15	-5.96141		TBX15	-2.69963		FAM169A	-2.59969		FAM164A	-2.58465		SNORD56B	-2.27555		VSIG6	-2.16274		IGKC	-2.60923
ANKS4B	-2.1119		PSMA8	-5.02218		C1orf161	-2.01436								ZFP57	-4.44961		ZNF578	-2.42984					MYO6	-5.8118		CADM1	-2.60111		FAM38B	-2.57775		FAM117B	-2.56264		ZNF208	-2.22994		ZFP57	-2.14844		TRIM49	-2.54449
CXCR4	-2.06091		LEF1	-4.85445		FAM169A	-2.01219								PITPNC1	-4.35863		IL10	-2.40985					PTPRG	-5.59231		LOC100129278	-2.45867		LOC100129150	-2.48933		CCDC59	-2.53276		TOM1L1	-2.18915		IQCA1L	-2.12671		IGKC	-2.51852
FLJ32742	-2.05748		LOC644714	-4.78481		GPC4	-2.00959								MOXD1	-4.10078		CACNB4	-2.37983					EPB41L5	-5.34221		NEFH	-2.45002		XAGE-4	-2.3763		ZCCHC9	-2.503		CD200R1	-2.14139		TOX	-2.11736		AK3L1	-2.30698
FCER1G	-2.04097		GPAM	-4.57227		PTPRG	-2.00647								GUCY1A3	-4.09234		TOM1L1	-2.32513					LRRK2	-5.23405		VN1R4	-2.42428		SLC47A1	-2.30959		PRICKLE1	-2.4564		VTRNA1-1	-2.07077		CD96	-2.07608		FAM169A	-2.29627
LOC100130100	-2.00029		CRIM1	-4.53044		HMOX1	-2.00611								SEL1L3	-3.92048		CCR2	-2.3192					ANO10	-5.07097		UCHL1	-2.39116		CXCL10	-2.29184		SNORD116-21	-2.44298		MGAT4A	-2.06058		C10orf99	-2.05287		PYHIN1	-2.29135
			IL13RA1	-4.51626		CRH	-2.00058								BVES	-3.807		PHKA1	-2.29697					GPR125	-5.00578		CCDC59	-2.38039		FAM38B	-2.28212		NPIPL3	-2.42891		MOSC2	-2.05497					PHEX	-2.26396
			SNORD116-21	-4.47298											LOC100291056	-3.77711		OCLN	-2.29634					GAS2	-4.88793		LILRA2	-2.33786		TNFSF8	-2.26616		LY96	-2.378		FLJ32742	-2.05324					SEL1L3	-2.23326
			SLCO3A1	-4.14511											CXCR4	-3.76911		LOC652493	-2.24625					CT45A6	-4.85844		PTPN14	-2.27996		IL18R1	-2.26389		FAM101B	-2.37707		LOC100131541	-2.0346					IGK@	-2.2148
			CADM2	-4.12068											SPARC	-3.76076		PRICKLE1	-2.24568					CYP7B1	-4.5552		SNX16	-2.27944		SNORD41	-2.24134		CCDC125	-2.31997		LOC100132099	-2.02041					LOC100130100	-2.21113
			CLEC6A	-4.09588											GRAP2	-3.63883		GPAM	-2.23944					LOC652493	-4.5003		GPR125	-2.09813		SNORD109A	-2.23545		CCDC125	-2.29673		IGKC	-2.01573					RNF130	-2.19925
			RPS6KA6	-4.0242											PYHIN1	-3.61588		PSTPIP2	-2.20063					STEAP1	-4.38015		SNORA40	-2.07268		SNORD109A	-2.23545		ZNF486	-2.29598		C21orf94	-2.01009					IGLV7-46	-2.19143
			ANO5	-3.92622											LOC652493	-3.61457		AS3MT	-2.19651					CD9	-4.25017		LAD1	-2.04593		SORT1	-2.22801		OR52K3P	-2.2953								KIR3DL2	-2.01147
			CD96	-3.76195											LGALS14	-3.61006		GLT1D1	-2.17573					TSPAN1	-4.24649		C3orf59	-2.04098		PTGER2	-2.21901		CEP70	-2.25966
			CACNB2	-3.71711											PTPN13	-3.58279		PRKCH	-2.15858					DACT1	-4.11434					PLA2G10	-2.21263		CD200	-2.25196
			UGT2B7	-3.64761											NRCAM	-3.43578		MIR142	-2.1412					RASSF6	-4.00295					SNORD116-1	-2.20084		GPR18	-2.19469
			KIAA1324	-3.64559											IGKC	-3.41959		SIX3	-2.1287					CD24	-3.91033					SRPX	-2.19452		C6orf47	-2.17142
			NT5E	-3.63191											UGT2B7	-3.3751		CD209	-2.10869					PTGS1	-3.86771					OR2M7	-2.18184		C6orf47	-2.17142
			NFIB	-3.59299											NEFH	-3.31882		MPP1	-2.09104					TINAG	-3.83188					CACNB4	-2.17172		LEF1	-2.16522
			RFC1	-3.51603											CDC42BPA	-3.31149		SNORD116-21	-2.0904					PARD3	-3.78764					IL18RAP	-2.15353		FMN1	-2.15742
			HIST1H2AK	-3.47012											RAB3B	-3.29836		IGLV7-46	-2.06929					MTTP	-3.68112					IGSF9B	-2.13788		LOC157740	-2.14157
			EPHB1	-3.42677											IGKC	-3.29448		GCNT1	-2.06582					SUCNR1	-3.62545					GPR183	-2.10874		HNF1B	-2.06805
			PTCH2	-3.40032											IGKC	-3.28433		PTHLH	-2.05188					CD96	-3.59715					KIAA1324L	-2.10112		LGALS3BP	-2.02375
			ANKRD32	-3.34683											GUCY1B3	-3.24569		FLNB	-2.03631					PARM1	-3.57048					SNORD116-23	-2.09672		NEFH	-2.01984
			RNU5A	-3.28435											PSTPIP2	-3.22547		RAB34	-2.03598					LIN7A	-3.5321					SNORD116-5	-2.09199
			EDN1	-3.26814											LOC646057	-3.14211		GPAM	-2.03009					S100A10	-3.42216					SNORD116-5	-2.09199
			SNORD77	-3.24959											LOC96610	-3.10403		GPAM	-2.02842					HOXB2	-3.41505					OR5M3	-2.08864
			GPR174	-3.24325											EPHB1	-3.04456								LOC100292301	-3.31034					IPCEF1	-2.0814
			SNORA40	-3.23135											CASP1	-3.00898								GPR34	-3.15231					KLRD1	-2.07752
			TRPC1	-3.2066											GTSF1	-2.9823								EDN1	-3.12439					GSTA4	-2.07514
			AMZ2P1	-3.1975											IL12RB2	-2.9817								DDX60L	-3.12321					IGKV3D-11	-2.06504
			OVOS	-3.17116											SYNJ2	-2.979								IFIT1	-3.1107					KLF3	-2.05791
			MIR186	-3.1521											INPP4B	-2.89173								CT45A1	-3.10284					ADAM19	-2.05539
			PRO2012	-3.13045											PLD1	-2.88843								CT45A4	-3.09689					C5orf17	-2.03977
			GPAM	-3.12789											TRAM2	-2.86363								TRIM2	-3.08726					IGF1	-2.03408
			TINAG	-3.09878											MYOF	-2.85186								LOC613266	-3.00658					SNORD116-6	-2.01923
			PLA2G4A	-3.08994											IGKC	-2.84124								CRIM1	-2.99637					CBLB	-2.01255
			RNU4-2	-3.07674											PFN2	-2.8283								PTPRJ	-2.98416					IL12RB2	-2.01048
			SCARNA9L	-3.05149											CASK	-2.78913								CT45A2	-2.97357					TMPRSS3	-2.00787
			PTGS1	-3.04415											ERC1	-2.76184								ALDH2	-2.91636					KIR2DS5	-2.00766
			SCARNA9	-3.03471											C14orf105	-2.75685								GLYATL2	-2.87674					DTX1	-2.0066
			GPR171	-3.03174											ARRB1	-2.70738								NCALD	-2.86325
			SNORD116-6	-3.01668											LOC642838	-2.70261								EPS8	-2.85084
			SNORD79	-3.01406											FRMD6	-2.68954								CPXM1	-2.84969
			STS	-3.00813											FARP1	-2.68629								FAM169A	-2.84847
			SAMD12	-3.0028											IGKV3D-11	-2.65445								GPR171	-2.81861
			CEP170L	-2.98872											LOC441233	-2.57688								RHOU	-2.74792
			LMO3	-2.95347											DNAJA4	-2.57247								DDX60	-2.73957
			SNORD47	-2.94601											EPB41L4A	-2.55162								SLC37A2	-2.71509
			EPS8	-2.92874											AMICA1	-2.54623								XAF1	-2.70447
			SNORD58A	-2.92411											VCAM1	-2.53133								IGF1	-2.68732
			HOOK1	-2.91899											LOC642838	-2.52936								NBEA	-2.68256
			CPXM1	-2.90424											LGALS3BP	-2.49349								IPCEF1	-2.67999
			RHOU	-2.88652											CYP1B1	-2.49207								OAS3	-2.65176
			PIGF	-2.88647											EDNRB	-2.44341								C2orf88	-2.64782
			LRRK2	-2.85945											SESN3	-2.42829								APOL1	-2.62148
			IMPAD1	-2.81479											T	-2.41994								IFI6	-2.62109
			CHL1	-2.80012											CYSLTR2	-2.3873								C10orf99	-2.61305
			CXorf21	-2.78127											ZNF730	-2.38719								CXCL10	-2.60719
			CD101	-2.77634											HAPLN3	-2.38699								TMEM2	-2.60566
			RPSAP58	-2.76167											LOC100132426	-2.36304								PLA1A	-2.57767
			ZNF675	-2.75196											TMEM2	-2.34739								ATP1B1	-2.57717
			OVOS	-2.74807											ZNF257	-2.33637								NLRP7	-2.56082
			CYP3A4	-2.73909											APOL6	-2.31702								HOOK1	-2.53864
			FAM134B	-2.73434											TMTC1	-2.31628								SPATS2L	-2.52195
			LRRC16A	-2.73097											VANGL1	-2.30515								BCORL2	-2.51475
			DACT1	-2.7188											AQP7	-2.30372								SASH1	-2.49736
			RAB7A	-2.70846											GCNT4	-2.29206								LIPH	-2.49381
			PARP15	-2.70806											DSG2	-2.28996								SAT1	-2.49004
			SCML1	-2.67968											RBPMS2	-2.27811								IFI44L	-2.4865
			ALDH7A1	-2.67406											HMOX1	-2.27409								LCN1L1	-2.48385
			ZNF257	-2.64061											FAM46C	-2.26196								CXorf21	-2.47642
			PARD3	-2.63582											EHHADH	-2.25986								CNKSR3	-2.46492
			CEP70	-2.61315											ROCK1P1	-2.25097								TCP11L2	-2.45421
			RNU5D	-2.61277											EPHX2	-2.22925								OR6B2	-2.4521
			HNF4G	-2.60438											SLC30A4	-2.21983								SLCO4C1	-2.43805
			RLIM	-2.59999											GBP5	-2.21752								CT45A5	-2.41843
			C2orf67	-2.5977											FCRL3	-2.21628								ILDR2	-2.38231
			CADPS2	-2.59643											GIMAP5	-2.20181								CT45A3	-2.35751
			CUZD1	-2.59478											TSPYL5	-2.19275								TCN2	-2.32586
			CRY1	-2.58124											FAM99A	-2.18477								FXYD2	-2.31236
			TRERF1	-2.56892											UBD	-2.1812								TMEM140	-2.30745
			RCHY1	-2.55921											KIAA1328	-2.17606								GAPT	-2.30744
			ELOVL6	-2.55416											CAMK4	-2.17443								ANTXR2	-2.3057
			C13orf27	-2.54884											GBP4	-2.17336								TNFRSF11A	-2.29233
			PARM1	-2.53807											SLC7A7	-2.14552								CCR1	-2.29191
			COX7B	-2.52855											DDX43	-2.12948								ABCA12	-2.28561
			S100A10	-2.52257											IGKC	-2.1278								CLMN	-2.28415
			SNRPG	-2.518											SORBS2	-2.12561								PRO2012	-2.27033
			HNF1B	-2.5154											CPPED1	-2.11976								NCF4	-2.26981
			FGFR1	-2.51034											SNX9	-2.10914								LRRC31	-2.24662
			MYO1B	-2.5054											GPR174	-2.09996								BCMO1	-2.24653
			CDA	-2.50423											NEFM	-2.09492								EPAS1	-2.24416
			ARRB1	-2.48371											SHOX2	-2.0783								SERPINB1	-2.23316
			PAR5	-2.4653											TLE1	-2.07079								OR5M3	-2.23257
			SNORD28	-2.45515											NLRP7	-2.06681								TIMP3	-2.22046
			CENPH	-2.45233											TRY6	-2.06632								EPSTI1	-2.20591
			ZFP37	-2.44974											SLC41A1	-2.0456								TMTC2	-2.20359
			HIST1H2AJ	-2.44107											TCN2	-2.04198								RASGRP1	-2.18382
			SNORD27	-2.43903											ULK2	-2.03973								KRT18	-2.1825
			KGFLP1	-2.43573											FAM101B	-2.02838								CASK	-2.1815
			KGFLP1	-2.43573											GGT3P	-2.02415								SPDYE3	-2.18037
			KGFLP1	-2.43573											LOC654433	-2.018								ADHFE1	-2.17611
			ZNF90	-2.43476											EYS	-2.01785								CECR1	-2.17403
			MIR142	-2.42611											CLCN4	-2.01359								TDGF3	-2.16098
			DDX60L	-2.42399											UBD	-2.0012								RSAD2	-2.15702
			CD3E	-2.41986																				ACTR3C	-2.15474
			TCP11L2	-2.41749																				SAMD9L	-2.15471
			FABP3	-2.41589																				IFIT3	-2.15284
			SNORD42A	-2.40481																				SYNE2	-2.14781
			KIAA1328	-2.4023																				LOC100130100	-2.14093
			VCL	-2.39775																				NCKAP5	-2.1367
			SCARNA1	-2.39606																				CD180	-2.13265
			NLRP2	-2.39573																				DAAM2	-2.12804
			PRTFDC1	-2.39297																				TRANK1	-2.11967
			LOC730144	-2.39256																				NCRNA00189	-2.11742
			GAB1	-2.39101																				KIAA1324	-2.11375
			LY96	-2.38745																				GPR82	-2.10155
			ETV5	-2.38109																				HERC6	-2.09513
			SNRPG	-2.35989																				TPTE2	-2.09133
			LOC100130428	-2.35891																				FCRL5	-2.09057
			RNU5F	-2.35502																				SERINC2	-2.07354
			SLCO4C1	-2.34704																				TXNIP	-2.07058
			CCR6	-2.3465																				HSD3B1	-2.06948
			C9orf21	-2.34253																				ELF3	-2.06118
			LRRC37A4	-2.33696																				SMC1B	-2.0599
			SLC25A24	-2.32631																				PARD6G	-2.05965
			DUSP19	-2.31994																				EVI2A	-2.05947
			MOSC2	-2.31765																				LILRB4	-2.05104
			PIGT	-2.31327																				KLHL13	-2.04079
			SNORD25	-2.30705																				APOC1	-2.02109
			EVI2A	-2.29877																				GPR174	-2.01382
			CT45A1	-2.28883																				LRP5	-2.01343
			GAS2L3	-2.28637																				FABP3	-2.00014
			LRRFIP1	-2.28511
			SNORD60	-2.2837
			HSD17B7P2	-2.27303
			GKAP1	-2.26397
			RNF125	-2.2607
			TM6SF1	-2.25905
			CETN3	-2.25835
			DEFB109P1B	-2.25241
			FLT1	-2.2517
			GNG2	-2.25119
			ZNF780B	-2.25036
			MSL3L2	-2.25009
			USP8	-2.24883
			THAP2	-2.24822
			SNORD1B	-2.24748
			LOC100129278	-2.24058
			NPIP	-2.23941
			SNORD24	-2.23667
			SNX9	-2.23646
			ALS2CR8	-2.23198
			LRRFIP1	-2.23195
			SLC44A1	-2.22445
			GPAM	-2.2242
			SNORD22	-2.21986
			LOC1720	-2.21649
			PDGFA	-2.21412
			ZNF224	-2.21072
			SPRY4	-2.20483
			SCD	-2.2025
			EIF4B	-2.201
			SNORD116-26	-2.19842
			FAM185A	-2.19207
			ZNF117	-2.19189
			LYPLAL1	-2.19167
			CCDC138	-2.18843
			CLECL1	-2.18835
			MRPS18C	-2.18145
			RALGAPA1	-2.18012
			ZNF814	-2.17651
			SNORD54	-2.17619
			LRRC37A4	-2.17523
			ST3GAL6	-2.1746
			RPAP3	-2.17027
			PION	-2.16871
			CXCR4	-2.16846
			ENY2	-2.16464
			LRRC1	-2.16379
			ZNF823	-2.16318
			ALDH1L2	-2.1618
			SNORA33	-2.15296
			BIK	-2.15247
			FAIM	-2.15243
			CHORDC1	-2.15223
			NDUFB6	-2.15058
			BTLA	-2.15022
			ZFP14	-2.14982
			CPNE8	-2.14899
			PITPNC1	-2.14898
			SNORD50B	-2.14482
			ZNF568	-2.14114
			TBXAS1	-2.13889
			SLC37A2	-2.13371
			ZNF181	-2.13218
			GCA	-2.13169
			ACTR6	-2.13127
			NCRNA00174	-2.13041
			RAB42	-2.12942
			ZNF486	-2.12896
			SNORD36B	-2.12838
			FCGR2A	-2.1269
			ACSM3	-2.12667
			KDELC1	-2.12376
			EFHA1	-2.11912
			ZNF577	-2.11803
			ZNF680	-2.11749
			ZNF724P	-2.11509
			EIF4A2	-2.11031
			LOC400061	-2.10718
			GPR34	-2.0935
			TNFRSF21	-2.09188
			ZNF230	-2.0906
			PION	-2.09025
			FAM164A	-2.08903
			LOC729595	-2.08881
			SPC25	-2.08782
			TMSB15B	-2.08645
			SNX16	-2.08521
			ZNF362	-2.08478
			KGFLP1	-2.08375
			TBC1D19	-2.08216
			LRRCC1	-2.08189
			ARHGAP21	-2.08141
			TBC1D2B	-2.08001
			SASH1	-2.07792
			OR4C6	-2.07747
			ITM2A	-2.07658
			TTC39B	-2.07561
			HIST1H2AM	-2.07555
			MORF4L2	-2.0741
			ZNF252	-2.07164
			NFIL3	-2.07126
			C15orf17	-2.07083
			CLEC2D	-2.06874
			SNORA22	-2.06511
			CCDC15	-2.05712
			CPPED1	-2.05559
			ATPBD4	-2.05473
			GBP5	-2.05391
			SNORA40	-2.04958
			ERMP1	-2.04933
			SYAP1	-2.0475
			ERP27	-2.04744
			SCD	-2.04638
			HIST1H2BF	-2.04352
			CHEK2	-2.04253
			PLEKHG7	-2.04013
			ZNF615	-2.03989
			TBC1D8B	-2.03865
			LOC400986	-2.03817
			ZNF253	-2.0381
			ZNF708	-2.03682
			LMBRD2	-2.03642
			TIMM23	-2.03453
			AIM2	-2.03105
			TLR1	-2.03094
			PLEKHA3	-2.03079
			ZNF542	-2.0295
			ISCA1	-2.02915
			SNORA1	-2.02852
			PDE8A	-2.02546
			SCRN3	-2.02339
			DTWD1	-2.0224
			ZNF430	-2.02129
			GAPT	-2.02022
			GLCE	-2.01974
			BCMO1	-2.01843
			RGL2	-2.01757
			RGL2	-2.01757
			GLUD1	-2.01721
			LAPTM4B	-2.01607
			FLJ32742	-2.01597
			NDFIP1	-2.01528
			CMAH	-2.01425
			IFT20	-2.01182
			ETV4	-2.01033
			FRG1	-2.00999
			SNORD63	-2.00981
			ASRGL1	-2.00964
			NAIP	-2.00875
			OTUD4	-2.0062
			SNORD82	-2.00262
			ANKRD32	-2.00229
			TMEM194B	-2.00147
			PTGR1	-2.00113
			ACSL3	-2.0001
