# Supplementary material for: Genome-Wide DNA Methylation and Gene Expression Analyses of Monozygotic Twins Discordant for Intelligence Levels
Source: PLoS One. 2012 Oct 17;7(10):e47081. doi: 10.1371/journal.pone.0047081 (PMC3474830; doi:10.1371/journal.pone.0047081)
Supplement: Dataset S2 — Pair-wise GSEA results using BioCarta database. Gene sets with a FDR q-value<0.25 were included. n/a indicates no gene set matched the FDR cutoff value. (XLS) [file pone.0047081.s002.xls]

## Sheet: twin pair ID 1
Up-regulated in Twin Pair ID 1 twinA										Up-regulated in Twin Pair ID 1 twinB
Gene Sets Name	Gene Sets Size	Enrichment Score	Normalized Enrichment Score	NOM p-val	FDR q-val	FWER p-val	RANK AT MAX	LEADING EDGE		Gene Sets Name	Gene Sets Size	Enrichment Score	Normalized Enrichment Score	NOM p-val	FDR q-val	FWER p-val	RANK AT MAX	LEADING EDGE
BIOCARTA_PROTEASOME_PATHWAY	18	0.676865	1.98944	0	0.0163518	0.057	4974	tags=72%, list=24%, signal=95%		n/a
BIOCARTA_MCM_PATHWAY	18	0.670819	1.99982	0	0.0224519	0.052	3661	tags=56%, list=18%, signal=67%
BIOCARTA_MITOCHONDRIA_PATHWAY	20	0.661859	2.02725	0	0.0303704	0.035	1174	tags=40%, list=6%, signal=42%
BIOCARTA_ATRBRCA_PATHWAY	18	0.63363	1.88132	0.0020284	0.0473201	0.201	6827	tags=83%, list=33%, signal=124%
BIOCARTA_DEATH_PATHWAY	30	0.537683	1.84791	0.00414079	0.0509234	0.259	1209	tags=27%, list=6%, signal=28%
BIOCARTA_EIF_PATHWAY	15	0.617882	1.77668	0.00803213	0.065827	0.459	7189	tags=80%, list=35%, signal=123%
BIOCARTA_HIVNEF_PATHWAY	55	0.460192	1.80363	0.00219298	0.0676059	0.38	4185	tags=31%, list=20%, signal=39%
BIOCARTA_NO2IL12_PATHWAY	17	0.597891	1.7782	0.0063425	0.0740333	0.455	656	tags=24%, list=3%, signal=24%
BIOCARTA_IGF1MTOR_PATHWAY	18	0.560103	1.70125	0.0223577	0.0963689	0.717	6916	tags=67%, list=33%, signal=100%
BIOCARTA_ETC_PATHWAY	9	0.718251	1.72219	0.0114504	0.0971992	0.641	5497	tags=89%, list=27%, signal=121%
BIOCARTA_MTOR_PATHWAY	21	0.542744	1.70565	0.00671141	0.102439	0.697	5839	tags=52%, list=28%, signal=73%
BIOCARTA_IL12_PATHWAY	22	0.519595	1.66904	0.0113852	0.113672	0.8	656	tags=23%, list=3%, signal=23%
BIOCARTA_KREB_PATHWAY	7	0.728675	1.65186	0.013363	0.1196	0.841	4618	tags=71%, list=22%, signal=92%
BIOCARTA_SODD_PATHWAY	10	0.639874	1.62468	0.014553	0.136365	0.905	4185	tags=70%, list=20%, signal=88%
BIOCARTA_CASPASE_PATHWAY	23	0.499081	1.60804	0.0164609	0.143402	0.925	978	tags=26%, list=5%, signal=27%
BIOCARTA_RANMS_PATHWAY	9	0.649058	1.57507	0.0318471	0.170875	0.962	4191	tags=56%, list=20%, signal=70%
BIOCARTA_BCELLSURVIVAL_PATHWAY	14	0.555222	1.55878	0.0421941	0.179678	0.976	3027	tags=36%, list=15%, signal=42%
BIOCARTA_DNAFRAGMENT_PATHWAY	9	0.624503	1.53641	0.0449898	0.185921	0.984	377	tags=33%, list=2%, signal=34%
BIOCARTA_CYTOKINE_PATHWAY	20	0.501254	1.53646	0.0240175	0.196204	0.984	1921	tags=35%, list=9%, signal=39%

## Sheet: twin pair ID 2
Up-regulated Twin Pair ID 2 twinA										Up-regulated in Twin Pair ID 2 twinB
Gene Sets Name	Gene Sets Size	Enrichment Score	Normalized Enrichment Score	NOM p-val	FDR q-val	FWER p-val	RANK AT MAX	LEADING EDGE		Gene Sets Name	Gene Sets Size	Enrichment Score	Normalized Enrichment Score	NOM p-val	FDR q-val	FWER p-val	RANK AT MAX	LEADING EDGE
BIOCARTA_CYTOKINE_PATHWAY	20	0.5977	1.79908	0.00157978	0.0901906	0.291	4620	tags=60%, list=22%, signal=77%		BIOCARTA_ATRBRCA_PATHWAY	18	-0.728089	-2.31999	0	0	0	3194	tags=61%, list=15%, signal=72%
BIOCARTA_INTRINSIC_PATHWAY	23	0.578524	1.80009	0.00153139	0.134136	0.289	7933	tags=83%, list=38%, signal=134%		BIOCARTA_MCM_PATHWAY	18	-0.703496	-2.22249	0	0.00203181	0.003	2837	tags=56%, list=14%, signal=64%
BIOCARTA_ERYTH_PATHWAY	15	0.63268	1.72942	0	0.1432	0.529	4688	tags=60%, list=23%, signal=78%		BIOCARTA_DEATH_PATHWAY	30	-0.560881	-2.004	0	0.0218968	0.061	4056	tags=40%, list=20%, signal=50%
BIOCARTA_COMP_PATHWAY	16	0.58944	1.66982	0.011041	0.154177	0.752	6715	tags=69%, list=32%, signal=102%		BIOCARTA_ATM_PATHWAY	19	-0.616691	-2.00603	0	0.0282481	0.059	3194	tags=37%, list=15%, signal=44%
BIOCARTA_ACE2_PATHWAY	13	0.63825	1.68354	0.0114566	0.155165	0.698	7493	tags=100%, list=36%, signal=157%		BIOCARTA_D4GDI_PATHWAY	13	-0.681828	-1.95697	0.00250627	0.0289773	0.097	4948	tags=77%, list=24%, signal=101%
BIOCARTA_AMI_PATHWAY	19	0.579974	1.70043	0.012012	0.159315	0.647	7933	tags=79%, list=38%, signal=128%		BIOCARTA_MTOR_PATHWAY	21	-0.579861	-1.91636	0.0030303	0.0374901	0.148	7533	tags=81%, list=36%, signal=127%
BIOCARTA_INFLAM_PATHWAY	26	0.576309	1.83525	0.00166945	0.180391	0.207	4688	tags=54%, list=23%, signal=70%		BIOCARTA_CASPASE_PATHWAY	23	-0.578054	-1.88255	0.00289855	0.049439	0.222	4907	tags=65%, list=24%, signal=85%
BIOCARTA_STEM_PATHWAY	15	0.595143	1.60428	0.0113452	0.242277	0.924	4620	tags=60%, list=22%, signal=77%		BIOCARTA_TALL1_PATHWAY	13	-0.628435	-1.80506	0.00248756	0.0906292	0.395	2477	tags=38%, list=12%, signal=44%
										BIOCARTA_DNAFRAGMENT_PATHWAY	9	-0.689028	-1.77148	0.00722892	0.0934785	0.475	4056	tags=56%, list=20%, signal=69%
										BIOCARTA_PROTEASOME_PATHWAY	18	-0.564262	-1.78447	0.00520833	0.0936818	0.443	5815	tags=50%, list=28%, signal=69%
										BIOCARTA_MITOCHONDRIA_PATHWAY	20	-0.547658	-1.75528	0.00817439	0.095859	0.523	4056	tags=40%, list=20%, signal=50%
										BIOCARTA_TOLL_PATHWAY	33	-0.458569	-1.67787	0.00914634	0.160117	0.737	3193	tags=33%, list=15%, signal=39%
										BIOCARTA_EIF2_PATHWAY	11	-0.604149	-1.63474	0.0253807	0.201448	0.84	8199	tags=100%, list=40%, signal=166%

## Sheet: twin pair ID 3
Up-regulated Twin Pair ID 3 twinA										Up-regulated Twin Pair ID 3 twinB
Gene Sets Name	Gene Sets Size	Enrichment Score	Normalized Enrichment Score	NOM p-val	FDR q-val	FWER p-val	RANK AT MAX	LEADING EDGE		Gene Sets Name	Gene Sets Size	Enrichment Score	Normalized Enrichment Score	NOM p-val	FDR q-val	FWER p-val	RANK AT MAX	LEADING EDGE
BIOCARTA_IL12_PATHWAY	22	0.622944	1.88002	0.00196464	0.214901	0.14	5077	tags=64%, list=25%, signal=84%		n/a
BIOCARTA_CDMAC_PATHWAY	15	0.643288	1.74846	0.011811	0.225797	0.475	858	tags=20%, list=4%, signal=21%
BIOCARTA_MET_PATHWAY	33	0.551489	1.81057	0	0.24341	0.294	2079	tags=27%, list=10%, signal=30%

## Sheet: twin pair ID 4
Up-regulated in Twin Pair ID 4 twinA										Up-regulated in Twin Pair ID 4 twinB
Gene Sets Name	Gene Sets Size	Enrichment Score	Normalized Enrichment Score	NOM p-val	FDR q-val	FWER p-val	RANK AT MAX	LEADING EDGE		Gene Sets Name	Gene Sets Size	Enrichment Score	Normalized Enrichment Score	NOM p-val	FDR q-val	FWER p-val	RANK AT MAX	LEADING EDGE
n/a										n/a

## Sheet: twin pair ID 5
Up-regulated in Twin Pair ID 5 twinA										Up-regulated in Twin Pair ID 5 twinB
Gene Sets Name	Gene Sets Size	Enrichment Score	Normalized Enrichment Score	NOM p-val	FDR q-val	FWER p-val	RANK AT MAX	LEADING EDGE		Gene Sets Name	Gene Sets Size	Enrichment Score	Normalized Enrichment Score	NOM p-val	FDR q-val	FWER p-val	RANK AT MAX	LEADING EDGE
n/a										n/a

## Sheet: twin pair ID 6
Up-regulated in Twin Pair ID 6 twinA										Up-regulated in Twin Pair ID 6 twinB
Gene Sets Name	Gene Sets Size	Enrichment Score	Normalized Enrichment Score	NOM p-val	FDR q-val	FWER p-val	RANK AT MAX	LEADING EDGE		Gene Sets Name	Gene Sets Size	Enrichment Score	Normalized Enrichment Score	NOM p-val	FDR q-val	FWER p-val	RANK AT MAX	LEADING EDGE
n/a										BIOCARTA_NO2IL12_PATHWAY	17	-0.739843	-2.04727	0.00200401	0.0245482	0.042	2149	tags=41%, list=10%, signal=46%
										BIOCARTA_ATRBRCA_PATHWAY	18	-0.750764	-2.12121	0	0.0283995	0.016	4129	tags=78%, list=20%, signal=97%
										BIOCARTA_TOB1_PATHWAY	20	-0.719017	-2.06935	0	0.0301971	0.034	2600	tags=35%, list=13%, signal=40%
										BIOCARTA_FAS_PATHWAY	30	-0.614861	-1.96812	0	0.0427862	0.096	5548	tags=60%, list=27%, signal=82%
										BIOCARTA_G2_PATHWAY	20	-0.657417	-1.91161	0	0.0633478	0.177	5704	tags=75%, list=28%, signal=103%
										BIOCARTA_NDKDYNAMIN_PATHWAY	15	-0.701214	-1.89416	0	0.0651364	0.214	1629	tags=33%, list=8%, signal=36%
										BIOCARTA_MCM_PATHWAY	18	-0.656301	-1.83105	0.00824742	0.10255	0.403	6059	tags=83%, list=29%, signal=118%
										BIOCARTA_NKT_PATHWAY	28	-0.59448	-1.84234	0.00795229	0.102938	0.356	218	tags=18%, list=1%, signal=18%
										BIOCARTA_THELPER_PATHWAY	13	-0.713156	-1.79319	0.00986193	0.138027	0.548	2068	tags=38%, list=10%, signal=43%
										BIOCARTA_TCYTOTOXIC_PATHWAY	13	-0.696852	-1.7637	0.00608519	0.146272	0.631	2068	tags=38%, list=10%, signal=43%
										BIOCARTA_DNAFRAGMENT_PATHWAY	9	-0.732411	-1.76749	0.00821355	0.155857	0.623	4399	tags=78%, list=21%, signal=99%
										BIOCARTA_FCER1_PATHWAY	35	-0.510999	-1.70435	0.00770713	0.176036	0.809	6861	tags=57%, list=33%, signal=85%
										BIOCARTA_EPHA4_PATHWAY	8	-0.738928	-1.71014	0.0164609	0.179748	0.796	3016	tags=63%, list=15%, signal=73%
										BIOCARTA_IL12_PATHWAY	22	-0.560857	-1.65893	0.0195695	0.188596	0.908	2853	tags=41%, list=14%, signal=47%
										BIOCARTA_BAD_PATHWAY	24	-0.563155	-1.71109	0.01002	0.192412	0.794	2392	tags=29%, list=12%, signal=33%
										BIOCARTA_SKP2E2F_PATHWAY	10	-0.695973	-1.64763	0.0220884	0.193544	0.926	5631	tags=90%, list=27%, signal=124%
										BIOCARTA_BCELLSURVIVAL_PATHWAY	14	-0.643929	-1.66028	0.0232558	0.196393	0.904	4085	tags=50%, list=20%, signal=62%
										BIOCARTA_PROTEASOME_PATHWAY	18	-0.59271	-1.66596	0.014433	0.197786	0.893	5625	tags=61%, list=27%, signal=84%
										BIOCARTA_INSULIN_PATHWAY	18	-0.576663	-1.6353	0.0276134	0.202192	0.937	6657	tags=67%, list=32%, signal=98%
										BIOCARTA_IL3_PATHWAY	14	-0.654009	-1.71508	0.0125523	0.202732	0.784	769	tags=29%, list=4%, signal=30%
										BIOCARTA_TNFR1_PATHWAY	29	-0.530227	-1.66812	0.00813008	0.205402	0.888	5548	tags=62%, list=27%, signal=85%
										BIOCARTA_CASPASE_PATHWAY	23	-0.561176	-1.67601	0.0124224	0.206493	0.877	2625	tags=39%, list=13%, signal=45%
										BIOCARTA_MONOCYTE_PATHWAY	10	-0.678307	-1.62236	0.025641	0.213127	0.953	1506	tags=50%, list=7%, signal=54%
										BIOCARTA_RAC1_PATHWAY	22	-0.549004	-1.57818	0.0336842	0.235232	0.982	2814	tags=36%, list=14%, signal=42%
										BIOCARTA_RB_PATHWAY	10	-0.651562	-1.58077	0.0425101	0.239455	0.979	5548	tags=60%, list=27%, signal=82%
										BIOCARTA_RAS_PATHWAY	20	-0.533184	-1.56734	0.0352251	0.244044	0.989	2392	tags=20%, list=12%, signal=23%
										BIOCARTA_GLEEVEC_PATHWAY	20	-0.544738	-1.56159	0.0392157	0.245522	0.992	6861	tags=70%, list=33%, signal=105%
										BIOCARTA_P27_PATHWAY	12	-0.622079	-1.58134	0.0487329	0.248077	0.979	7496	tags=92%, list=36%, signal=144%

## Sheet: twin pair ID 7
Up-regulated in Twin Pair ID 7 twinA										Up-regulated in Twin Pair ID 7 twinB
Gene Sets Name	Gene Sets Size	Enrichment Score	Normalized Enrichment Score	NOM p-val	FDR q-val	FWER p-val	RANK AT MAX	LEADING EDGE		Gene Sets Name	Gene Sets Size	Enrichment Score	Normalized Enrichment Score	NOM p-val	FDR q-val	FWER p-val	RANK AT MAX	LEADING EDGE
BIOCARTA_ERYTH_PATHWAY	15	0.70548	1.89811	0.0019685	0.111486	0.128	708	tags=33%, list=3%, signal=34%		BIOCARTA_MONOCYTE_PATHWAY	10	-0.788443	-1.89405	0	0.201178	0.156	593	tags=40%, list=3%, signal=41%
BIOCARTA_IGF1MTOR_PATHWAY	18	0.639182	1.77703	0	0.238491	0.448	1881	tags=28%, list=9%, signal=31%

## Sheet: twin piar ID 8
Up-regulated in Twin Pair ID 8 twinA										Up-regulated in Twin Pair ID 8 twinB
Gene Sets Name	Gene Sets Size	Enrichment Score	Normalized Enrichment Score	NOM p-val	FDR q-val	FWER p-val	RANK AT MAX	LEADING EDGE		Gene Sets Name	Gene Sets Size	Enrichment Score	Normalized Enrichment Score	NOM p-val	FDR q-val	FWER p-val	RANK AT MAX	LEADING EDGE
BIOCARTA_NFKB_PATHWAY	21	0.657169	1.90812	0	0.106033	0.082	1899	tags=29%, list=9%, signal=31%		n/a
BIOCARTA_41BB_PATHWAY	17	0.652216	1.7951	0.00191205	0.148802	0.303	2043	tags=35%, list=10%, signal=39%
BIOCARTA_CYTOKINE_PATHWAY	20	0.637347	1.81547	0.0037594	0.179236	0.251	1607	tags=40%, list=8%, signal=43%
BIOCARTA_LAIR_PATHWAY	16	0.619572	1.65069	0.0190476	0.238685	0.823	1287	tags=38%, list=6%, signal=40%
BIOCARTA_INTEGRIN_PATHWAY	36	0.504451	1.66123	0.0093985	0.23936	0.794	4165	tags=42%, list=20%, signal=52%
BIOCARTA_P53HYPOXIA_PATHWAY	20	0.586819	1.67505	0.0146789	0.243593	0.752	4466	tags=50%, list=22%, signal=64%
BIOCARTA_IL10_PATHWAY	17	0.627714	1.68905	0.013308	0.246823	0.707	4037	tags=41%, list=20%, signal=51%

## Sheet: twin pair ID 9
Up-regulated in Twin Pair ID 9 twinA										Up-regulated in Twin Pair ID 9 twinB
Gene Sets Name	Gene Sets Size	Enrichment Score	Normalized Enrichment Score	NOM p-val	FDR q-val	FWER p-val	RANK AT MAX	LEADING EDGE		Gene Sets Name	Gene Sets Size	Enrichment Score	Normalized Enrichment Score	NOM p-val	FDR q-val	FWER p-val	RANK AT MAX	LEADING EDGE
BIOCARTA_MCM_PATHWAY	18	0.669742	1.91561	0.00198413	0.160308	0.174	2912	tags=72%, list=14%, signal=84%		n/a

## Sheet: twin pair ID 10
Up-regulated in Twin Pair ID 10 twinA										Up-regulated in Twin Pair ID 10 twinB
Gene Sets Name	Gene Sets Size	Enrichment Score	Normalized Enrichment Score	NOM p-val	FDR q-val	FWER p-val	RANK AT MAX	LEADING EDGE		Gene Sets Name	Gene Sets Size	Enrichment Score	Normalized Enrichment Score	NOM p-val	FDR q-val	FWER p-val	RANK AT MAX	LEADING EDGE
BIOCARTA_PDGF_PATHWAY	28	0.587687	1.90191	0	0.0979066	0.124	3968	tags=43%, list=19%, signal=53%		n/a
BIOCARTA_IL10_PATHWAY	17	0.679791	1.95125	0	0.106146	0.072	3968	tags=59%, list=19%, signal=73%
BIOCARTA_CCR5_PATHWAY	16	0.642736	1.79182	0.00184502	0.135574	0.383	4689	tags=63%, list=23%, signal=81%
BIOCARTA_IL2RB_PATHWAY	36	0.515765	1.79611	0.00409836	0.164209	0.371	3916	tags=42%, list=19%, signal=51%
BIOCARTA_IL22BP_PATHWAY	16	0.65276	1.81327	0	0.182103	0.315	3968	tags=75%, list=19%, signal=93%
BIOCARTA_ETC_PATHWAY	9	0.729284	1.72853	0.0126812	0.214232	0.59	4467	tags=78%, list=22%, signal=99%
BIOCARTA_EGF_PATHWAY	28	0.531481	1.67225	0.0134875	0.219399	0.792	3968	tags=39%, list=19%, signal=49%
BIOCARTA_UCALPAIN_PATHWAY	17	0.608008	1.70958	0.00998004	0.221037	0.664	4154	tags=47%, list=20%, signal=59%
BIOCARTA_KERATINOCYTE_PATHWAY	43	0.467167	1.67752	0.00775194	0.230061	0.775	5603	tags=44%, list=27%, signal=60%
BIOCARTA_CHEMICAL_PATHWAY	20	0.572859	1.68643	0.0101626	0.239928	0.749	5774	tags=60%, list=28%, signal=83%

[truncated: 7 more sheets: twin piar ID 11, twin pair ID 12, twin pair ID 13, twin pair ID 14, twin pair ID 15, twin pair ID 16, twin pair ID 17]
