# Supplementary material for: Genome-Wide DNA Methylation and Gene Expression Analyses of Monozygotic Twins Discordant for Intelligence Levels
Source: PLoS One. 2012 Oct 17;7(10):e47081. doi: 10.1371/journal.pone.0047081 (PMC3474830; doi:10.1371/journal.pone.0047081)
Supplement: Dataset S4 — Pair-wise GSEA results using Reactome database. Gene sets with a FDR q-value<0.25 were included. n/a indicates no gene set matched the FDR cutoff value. (XLS) [file pone.0047081.s004.xls]

## Sheet: twin pair ID 1
Up-regulated in Twin Pair ID 1 twinA										Up-regulated in Twin Pair ID 1 twinB
Gene Sets Name	Gene Sets Size	Enrichment Score	Normalized Enrichment Score	NOM p-val	FDR q-val	FWER p-val	RANK AT MAX	LEADING EDGE		Gene Sets Name	Gene Sets Size	Enrichment Score	Normalized Enrichment Score	NOM p-val	FDR q-val	FWER p-val	RANK AT MAX	LEADING EDGE
REACTOME_CELL_CYCLE_CHECKPOINTS	101	0.63915	2.81085	0	0	0	5114	tags=65%, list=25%, signal=86%		REACTOME_GPCR_LIGAND_BINDING	366	-0.431515	-2.19172	0	0.000773913	0.002	6540	tags=57%, list=32%, signal=82%
REACTOME_CELL_CYCLE_MITOTIC	282	0.534197	2.7419	0	0	0	4974	tags=49%, list=24%, signal=63%		REACTOME_NCAM1_INTERACTIONS	44	-0.599006	-2.19975	0	0.00154783	0.002	5187	tags=64%, list=25%, signal=85%
REACTOME_DNA_REPLICATION_PRE_INITIATION	74	0.651273	2.73163	0	0	0	4704	tags=65%, list=23%, signal=84%		REACTOME_DEPOLARIZATION_OF_THE_PRESYNAPTIC_TERMINAL_TRIGGERS_THE_OPENING_OF_CALCIUM_CHANNELS	12	-0.795734	-2.0875	0	0.00155076	0.01	2177	tags=42%, list=11%, signal=47%
REACTOME_S_PHASE	100	0.612834	2.70504	0	0	0	4974	tags=60%, list=24%, signal=79%		REACTOME_DOWNSTREAM_EVENTS_IN_GPCR_SIGNALING	420	-0.400914	-2.07213	0	0.00155154	0.014	5514	tags=43%, list=27%, signal=58%
REACTOME_SYNTHESIS_OF_DNA	86	0.627999	2.68702	0	0	0	4974	tags=63%, list=24%, signal=82%		REACTOME_CLASS_A1_RHODOPSIN_LIKE_RECEPTORS	269	-0.428813	-2.10965	0	0.00156883	0.006	5514	tags=49%, list=27%, signal=66%
REACTOME_G1_S_TRANSITION	96	0.618837	2.67041	0	0	0	4704	tags=61%, list=23%, signal=79%		REACTOME_AMINE_LIGAND_BINDING_RECEPTORS	42	-0.574996	-2.07896	0	0.00167945	0.013	5348	tags=52%, list=26%, signal=70%
REACTOME_MITOTIC_M_M_G1_PHASES	146	0.570854	2.65852	0	0	0	4974	tags=55%, list=24%, signal=72%		REACTOME_NCAM_SIGNALING_FOR_NEURITE_OUT_GROWTH	65	-0.535332	-2.09386	0	0.00175681	0.009	5187	tags=54%, list=25%, signal=72%
REACTOME_M_G1_TRANSITION	60	0.648105	2.59997	0	0	0	4974	tags=67%, list=24%, signal=88%		REACTOME_OTHER_SEMAPHORIN_INTERACTIONS	14	-0.69365	-1.91943	0	0.0115054	0.143	5593	tags=71%, list=27%, signal=98%
REACTOME_TRANSCRIPTION	171	0.539231	2.58601	0	0	0	6617	tags=60%, list=32%, signal=88%		REACTOME_G_ALPHA_Q_SIGNALLING_EVENTS	146	-0.419804	-1.92105	0	0.0125209	0.14	5588	tags=50%, list=27%, signal=68%
REACTOME_CDT1_ASSOCIATION_WITH_THE_CDC6_ORC_ORIGIN_COMPLEX	51	0.670469	2.55471	0	0	0	4974	tags=71%, list=24%, signal=93%		REACTOME_PLATELET_ADHESION_TO_EXPOSED_COLLAGEN	14	-0.698529	-1.92451	0.00200401	0.0132985	0.132	5121	tags=57%, list=25%, signal=76%
REACTOME_METABOLISM_OF_RNA	89	0.590353	2.54261	0	0	0	6916	tags=72%, list=33%, signal=108%		REACTOME_AXON_GUIDANCE	154	-0.411424	-1.87764	0	0.0157238	0.235	5378	tags=43%, list=26%, signal=57%
REACTOME_AUTODEGRADATION_OF_CDH1_BY_CDH1_APC	55	0.637403	2.53777	0	0	0	5114	tags=65%, list=25%, signal=87%		REACTOME_PHOSPHOLIPASE_CMEDIATED_CASCADE	22	-0.601996	-1.88086	0.0019802	0.0162466	0.227	6909	tags=77%, list=33%, signal=116%
REACTOME_VIF_MEDIATED_DEGRADATION_OF_APOBEC3G	45	0.660741	2.53754	0	0	0	4974	tags=69%, list=24%, signal=90%		REACTOME_PEPTIDE_LIGAND_BINDING_RECEPTORS	163	-0.405663	-1.86776	0	0.0165143	0.262	5373	tags=49%, list=26%, signal=66%
REACTOME_ORC1_REMOVAL_FROM_CHROMATIN	62	0.623618	2.5094	0	0	0	4974	tags=63%, list=24%, signal=83%		REACTOME_CLASS_B2_SECRETIN_FAMILY_RECEPTORS	82	-0.451058	-1.85923	0	0.0168772	0.282	6628	tags=57%, list=32%, signal=84%
REACTOME_REGULATION_OF_APC_ACTIVATORS_BETWEEN_G1_S_AND_EARLY_ANAPHASE	67	0.610817	2.50915	0	0	0	5114	tags=63%, list=25%, signal=83%		REACTOME_NUCLEOTIDE_LIKE_PURINERGIC_RECEPTORS	14	-0.68147	-1.88227	0	0.0175077	0.224	3308	tags=57%, list=16%, signal=68%
REACTOME_SCF_BETA_TRCP_MEDIATED_DEGRADATION_OF_EMI1	47	0.647467	2.47433	0	0	0	4974	tags=66%, list=24%, signal=87%		REACTOME_SEMAPHORIN_INTERACTIONS	64	-0.456207	-1.82782	0	0.0227526	0.383	5721	tags=44%, list=28%, signal=60%
REACTOME_REGULATION_OF_ORNITHINE_DECARBOXYLASE	46	0.657066	2.47235	0	0	0	4974	tags=67%, list=24%, signal=89%		REACTOME_G_ALPHA_S_SIGNALLING_EVENTS	117	-0.411867	-1.81187	0	0.0263315	0.447	6142	tags=47%, list=30%, signal=66%
REACTOME_ELECTRON_TRANSPORT_CHAIN	57	0.623452	2.46464	0	0	0	5729	tags=65%, list=28%, signal=90%		REACTOME_SHCMEDIATED_CASCADE	20	-0.58719	-1.77815	0.00766283	0.0336508	0.568	6909	tags=70%, list=33%, signal=105%
REACTOME_CDC20_PHOSPHO_APC_MEDIATED_DEGRADATION_OF_CYCLIN_A	59	0.619869	2.46152	0	0	0	5114	tags=66%, list=25%, signal=88%		REACTOME_TRANSMISSION_ACROSS_CHEMICAL_SYNAPSES	123	-0.404394	-1.78	0	0.0349914	0.565	3422	tags=30%, list=17%, signal=36%
REACTOME_FORMATION_AND_MATURATION_OF_MRNA_TRANSCRIPT	140	0.52564	2.4598	0	0	0	6493	tags=58%, list=31%, signal=84%		REACTOME_NEURORANSMITTER_RECEPTOR_BINDING_AND_DOWNSTREAM_TRANSMISSION_IN_THE_POSTSYNAPTIC_CELL	77	-0.431802	-1.75995	0	0.0389825	0.64	3352	tags=30%, list=16%, signal=36%
REACTOME_RNA_POLYMERASE_II_TRANSCRIPTION	85	0.564023	2.44833	0	0	0	6732	tags=68%, list=33%, signal=101%		REACTOME_CREB_PHOSPHORYLATION_THROUGH_THE_ACTIVATION_OF_CAMKII	14	-0.650914	-1.74575	0.0075188	0.0404119	0.682	3352	tags=43%, list=16%, signal=51%
REACTOME_P53_INDEPENDENT_DNA_DAMAGE_RESPONSE	42	0.668766	2.43088	0	0	0	4974	tags=71%, list=24%, signal=94%		REACTOME_STRIATED_MUSCLE_CONTRACTION	30	-0.521563	-1.74089	0.00773694	0.0409664	0.7	3789	tags=47%, list=18%, signal=57%
REACTOME_TRANSLATION	106	0.541638	2.42934	0	0	0	7227	tags=64%, list=35%, signal=98%		REACTOME_PHASE_1_FUNCTIONALIZATION	14	-0.634461	-1.74646	0.0134615	0.0420094	0.677	3291	tags=43%, list=16%, signal=51%
REACTOME_STABILIZATION_OF_P53	44	0.640355	2.42812	0	0	0	4974	tags=66%, list=24%, signal=87%		REACTOME_MUSCLE_CONTRACTION	48	-0.458047	-1.72329	0	0.0449295	0.751	5445	tags=48%, list=26%, signal=65%
REACTOME_CYCLIN_E_ASSOCIATED_EVENTS_DURING_G1_S_TRANSITION_	57	0.61944	2.42292	0	0	0	4974	tags=63%, list=24%, signal=83%		REACTOME_G_ALPHA_I_SIGNALLING_EVENTS	164	-0.373761	-1.72774	0	0.0449548	0.743	5376	tags=39%, list=26%, signal=52%
REACTOME_G2_M_CHECKPOINTS	37	0.6668	2.38936	0	0	0	4386	tags=65%, list=21%, signal=82%		REACTOME_ACTIVATION_OF_NMDA_RECEPTOR_UPON_GLUTAMATE_BINDING_AND_POSTSYNAPTIC_EVENTS	33	-0.483455	-1.67783	0.0115163	0.0557403	0.895	3352	tags=33%, list=16%, signal=40%
REACTOME_LATE_PHASE_OF_HIV_LIFE_CYCLE	82	0.557903	2.38031	0	0	0	6091	tags=62%, list=29%, signal=88%		REACTOME_XENOBIOTICS	12	-0.63867	-1.68049	0.0125261	0.0562654	0.886	3606	tags=58%, list=17%, signal=71%
REACTOME_SNRNP_ASSEMBLY	45	0.631749	2.36772	0	0	0	6079	tags=76%, list=29%, signal=107%		REACTOME_INTEGRIN_CELL_SURFACE_INTERACTIONS	76	-0.409276	-1.684	0	0.0566445	0.876	5213	tags=45%, list=25%, signal=60%
REACTOME_ACTIVATION_OF_ATR_IN_RESPONSE_TO_REPLICATION_STRESS	33	0.677744	2.36468	0	0	0	4386	tags=67%, list=21%, signal=84%		REACTOME_FRS2MEDIATED_CASCADE	26	-0.525021	-1.68772	0.00715563	0.056714	0.859	7135	tags=69%, list=34%, signal=106%
REACTOME_SIGNALING_BY_WNT	56	0.59367	2.36344	0	0	0	4974	tags=57%, list=24%, signal=75%		REACTOME_SEROTONIN_RECEPTORS	12	-0.64271	-1.6883	0.0122449	0.0583544	0.855	2026	tags=42%, list=10%, signal=46%
REACTOME_TELOMERE_MAINTENANCE	65	0.577414	2.35114	0	0	0	5723	tags=58%, list=28%, signal=81%		REACTOME_DOWNSTREAM_SIGNALING_OF_ACTIVATED_FGFR	39	-0.462986	-1.64972	0.00579151	0.0687827	0.943	7135	tags=62%, list=34%, signal=94%
REACTOME_SCF_SKP2_MEDIATED_DEGRADATION_OF_P27_P21	51	0.606496	2.34571	0	0	0	4974	tags=63%, list=24%, signal=82%		REACTOME_ADHERENS_JUNCTIONS_INTERACTIONS	28	-0.497857	-1.63161	0.00798403	0.0703808	0.96	4766	tags=50%, list=23%, signal=65%
REACTOME_ELONGATION_AND_PROCESSING_OF_CAPPED_TRANSCRIPTS	123	0.520811	2.34164	0	0	0	6493	tags=57%, list=31%, signal=82%		REACTOME_DOPAMINE_NEUROTRANSMITTER_RELEASE_CYCLE	14	-0.604458	-1.63872	0.0291829	0.0707343	0.956	3813	tags=50%, list=18%, signal=61%
REACTOME_INFLUENZA_LIFE_CYCLE	122	0.512923	2.33308	0	0	0	7227	tags=60%, list=35%, signal=91%		REACTOME_PI3K_CASCADE	34	-0.474892	-1.63252	0.00539568	0.071854	0.959	7135	tags=65%, list=34%, signal=99%
REACTOME_GTP_HYDROLYSIS_AND_JOINING_OF_THE_60S_RIBOSOMAL_SUBUNIT	93	0.531213	2.32632	0	0	0	7227	tags=62%, list=35%, signal=95%		REACTOME_CELL_JUNCTION_ORGANIZATION	76	-0.397734	-1.63879	0.00567108	0.0728965	0.956	3963	tags=37%, list=19%, signal=45%
REACTOME_RNA_POLYMERASE_I_PROMOTER_CLEARANCE	64	0.553902	2.26015	0	3.2967e-05	0.001	6461	tags=58%, list=31%, signal=84%		REACTOME_CYTOSOLIC_SULFONATION_OF_SMALL_MOLECULES	9	-0.661599	-1.61782	0.0292398	0.075322	0.97	1647	tags=44%, list=8%, signal=48%
REACTOME_RNA_POLYMERASE_I_III_AND_MITOCHONDRIAL_TRANSCRIPTION	99	0.521815	2.26839	0	3.38346e-05	0.001	6541	tags=55%, list=32%, signal=79%		REACTOME_CRMPS_IN_SEMA3A_SIGNALING	16	-0.564564	-1.62048	0.0234834	0.0757573	0.968	5333	tags=63%, list=26%, signal=84%
REACTOME_HIV_INFECTION	172	0.475537	2.27294	0	3.4749e-05	0.001	6617	tags=59%, list=32%, signal=86%		REACTOME_PYRIMIDINE_CATABOLISM	9	-0.662748	-1.60268	0.0196078	0.0828575	0.982	1784	tags=44%, list=9%, signal=49%
REACTOME_PROCESSING_OF_CAPPED_INTRON_CONTAINING_PRE_MRNA	129	0.508509	2.30843	0	3.57143e-05	0.001	6356	tags=53%, list=31%, signal=77%		REACTOME_RAS_ACTIVATION_UOPN_CA2_INFUX_THROUGH_NMDA_RECEPTOR	16	-0.563042	-1.58907	0.0228571	0.0899155	0.988	3352	tags=38%, list=16%, signal=45%
REACTOME_HIV_LIFE_CYCLE	95	0.499393	2.20749	0	6.21361e-05	0.002	6617	tags=63%, list=32%, signal=92%		REACTOME_CREB_PHOPHORYLATION_THROUGH_THE_ACTIVATION_OF_RAS	24	-0.502596	-1.57944	0.0175781	0.0941134	0.991	3352	tags=33%, list=16%, signal=40%
REACTOME_DNA_REPAIR	92	0.516394	2.22511	0	6.35812e-05	0.002	7103	tags=62%, list=34%, signal=94%		REACTOME_HDL_MEDIATED_LIPID_TRANSPORT	10	-0.616591	-1.56148	0.0490196	0.0998117	0.996	5168	tags=70%, list=25%, signal=93%
REACTOME_MRNA_SPLICING	100	0.507085	2.23106	0	6.5095e-05	0.002	6489	tags=54%, list=31%, signal=78%		REACTOME_FGFR_LIGAND_BINDING_AND_ACTIVATION	26	-0.496667	-1.56669	0.0245747	0.101052	0.996	7135	tags=69%, list=34%, signal=106%
REACTOME_GENE_EXPRESSION	383	0.428119	2.24207	0	6.66827e-05	0.002	6617	tags=52%, list=32%, signal=76%		REACTOME_SEROTONIN_NEUROTRANSMITTER_RELEASE_CYCLE	14	-0.575323	-1.56265	0.027451	0.101383	0.996	3813	tags=43%, list=18%, signal=53%
REACTOME_ACTIVATION_OF_THE_PRE_REPLICATIVE_COMPLEX	29	0.674548	2.24246	0	6.83498e-05	0.002	4386	tags=62%, list=21%, signal=79%		REACTOME_POST_NMDA_RECEPTOR_ACTIVATION_EVENTS	29	-0.470006	-1.53726	0.0304183	0.109561	0.999	3352	tags=31%, list=16%, signal=37%
REACTOME_MITOTIC_PROMETAPHASE	83	0.510564	2.18943	0	0.000114494	0.004	4967	tags=47%, list=24%, signal=62%		REACTOME_P2Y_RECEPTORS	11	-0.60505	-1.54583	0.0478927	0.109979	0.999	3308	tags=45%, list=16%, signal=54%
REACTOME_TRANSCRIPTION_OF_THE_HIV_GENOME	53	0.565828	2.1946	0	0.000117038	0.004	6617	tags=68%, list=32%, signal=100%		REACTOME_TRAFFICKING_OF_AMPA_RECEPTORS	28	-0.468261	-1.53936	0.0330275	0.110222	0.999	3352	tags=32%, list=16%, signal=38%
REACTOME_TRANSLATION_INITIATION_COMPLEX_FORMATION	50	0.583348	2.17967	0	0.000165039	0.006	7227	tags=70%, list=35%, signal=107%		REACTOME_BILE_SALT_AND_ORGANIC_ANION_SLC_TRANSPORTERS	12	-0.577267	-1.53258	0.0459082	0.111061	0.999	2000	tags=42%, list=10%, signal=46%
REACTOME_TRNA_AMINOACYLATION	36	0.595852	2.15766	0	0.000174453	0.007	7319	tags=78%, list=35%, signal=120%		REACTOME_REGULATION_OF_INSULIN_SECRETION_BY_ACETYLCHOLINE	21	-0.493691	-1.54003	0.0249042	0.112254	0.999	3392	tags=43%, list=16%, signal=51%
REACTOME_DNA_STRAND_ELONGATION	29	0.633444	2.17413	0	0.000177942	0.007	5239	tags=62%, list=25%, signal=83%		REACTOME_CELL_CELL_ADHESION_SYSTEMS	54	-0.394718	-1.52113	0.0209125	0.11773	0.999	3297	tags=35%, list=16%, signal=42%
REACTOME_INFLUENZA_VIRAL_RNA_TRANSCRIPTION_AND_REPLICATION	89	0.504501	2.17522	0	0.000181574	0.007	7227	tags=58%, list=35%, signal=89%		REACTOME_REGULATION_OF_INSULIN_SECRETION_BY_FREE_FATTY_ACIDS	19	-0.49044	-1.50441	0.0433925	0.129351	0.999	3392	tags=42%, list=16%, signal=50%
REACTOME_FORMATION_OF_THE_TERNARY_COMPLEX_AND_SUBSEQUENTLY_THE_43S_COMPLEX	43	0.579213	2.1764	0	0.000185356	0.007	7227	tags=70%, list=35%, signal=107%		REACTOME_AMINE_DERIVED_HORMONES	12	-0.566614	-1.49252	0.0705882	0.137297	1	2042	tags=25%, list=10%, signal=28%
REACTOME_VIRAL_MRNA_TRANSLATION	74	0.50796	2.14243	0	0.000189581	0.008	7227	tags=58%, list=35%, signal=89%		REACTOME_REGULATION_OF_INSULIN_SECRETION_BY_GLUCAGON_LIKE_PEPTIDE_1	57	-0.383023	-1.48679	0.02693	0.14013	1	3857	tags=28%, list=19%, signal=34%
REACTOME_FORMATION_OF_A_POOL_OF_FREE_40S_SUBUNITS	82	0.508003	2.14524	0	0.000193227	0.008	7227	tags=59%, list=35%, signal=90%		REACTOME_TRANSLOCATION_OF_ZAP70_TO_IMMUNOLOGICAL_SYNAPSE	16	-0.521988	-1.47981	0.0504854	0.144175	1	3828	tags=56%, list=18%, signal=69%
REACTOME_TRANSPORT_OF_MATURE_MRNA_DERIVED_FROM_AN_INTRON_CONTAINING_TRANSCRIPT	48	0.545342	2.09511	0	0.00031574	0.014	7905	tags=75%, list=38%, signal=121%		REACTOME_FORMATION_OF_PLATELET_PLUG	175	-0.312276	-1.46047	0.00530035	0.157294	1	3963	tags=26%, list=19%, signal=32%
REACTOME_HOST_INTERACTIONS_OF_HIV_FACTORS	115	0.465761	2.10976	0	0.000321587	0.014	6321	tags=54%, list=31%, signal=77%		REACTOME_SEMA3A_PLEXIN_REPULSION_SIGNALING_BY_INHIBITING_INTEGRIN_ADHESION	14	-0.542194	-1.46168	0.0578035	0.159003	1	5378	tags=57%, list=26%, signal=77%
REACTOME_PEPTIDE_CHAIN_ELONGATION	74	0.502504	2.08151	0	0.000398645	0.018	7227	tags=58%, list=35%, signal=89%		REACTOME_SIGNALING_BY_PDGF	59	-0.368726	-1.44627	0.0325048	0.1678	1	5187	tags=41%, list=25%, signal=54%
REACTOME_METABOLISM_OF_PROTEINS	194	0.42897	2.07522	0	0.000458831	0.021	7356	tags=58%, list=36%, signal=90%		REACTOME_HEMOSTASIS	255	-0.295035	-1.43936	0.00340136	0.172249	1	3963	tags=25%, list=19%, signal=31%
REACTOME_METABOLISM_OF_MRNA	44	0.554852	2.05678	0	0.000601171	0.028	6916	tags=64%, list=33%, signal=95%		REACTOME_PROSTANOID_HORMONES	10	-0.571628	-1.43613	0.0762082	0.172536	1	4009	tags=40%, list=19%, signal=50%
REACTOME_TRANSCRIPTION_COUPLED_NER	38	0.568013	2.05206	0	0.000610756	0.029	7103	tags=66%, list=34%, signal=100%		REACTOME_CLASS_C3_METABOTROPIC_GLUTAMATE_PHEROMONE_RECEPTORS	15	-0.508784	-1.43165	0.0816733	0.17443	1	6019	tags=60%, list=29%, signal=85%
REACTOME_EXTENSION_OF_TELOMERES	27	0.626371	2.03249	0	0.000723333	0.035	5239	tags=63%, list=25%, signal=84%		REACTOME_INTRINSIC_PATHWAY	17	-0.497083	-1.42234	0.06917	0.180756	1	6984	tags=65%, list=34%, signal=98%
REACTOME_MRNA_3_END_PROCESSING	33	0.588445	2.02901	0	0.000769709	0.038	6356	tags=70%, list=31%, signal=100%		REACTOME_OLFACTORY_SIGNALING_PATHWAY	321	-0.281162	-1.41642	0.00167224	0.184559	1	3347	tags=26%, list=16%, signal=30%
REACTOME_RNA_POLYMERASE_I_PROMOTER_OPENING	44	0.533488	2.02728	0	0.000776835	0.039	6301	tags=57%, list=30%, signal=82%		REACTOME_INTEGRIN_ALPHAIIBBETA3_SIGNALING	22	-0.462779	-1.40579	0.0676692	0.190375	1	3933	tags=36%, list=19%, signal=45%
REACTOME_HIV1_TRANSCRIPTION_ELONGATION	36	0.563601	2.00822	0.00214133	0.00115981	0.056	6493	tags=67%, list=31%, signal=97%		REACTOME_AMINE_COMPOUND_SLC_TRANSPORTERS	28	-0.421616	-1.40736	0.0620301	0.19138	1	4010	tags=36%, list=19%, signal=44%
REACTOME_PACKAGING_OF_TELOMERE_ENDS	38	0.556027	1.98314	0	0.00148407	0.073	5723	tags=55%, list=28%, signal=76%		REACTOME_CELL_SURFACE_INTERACTIONS_AT_THE_VASCULAR_WALL	87	-0.331186	-1.39964	0.0419708	0.192251	1	3675	tags=26%, list=18%, signal=32%
REACTOME_RNA_POLYMERASE_I_PROMOTER_ESCAPE	18	0.663613	1.98399	0.00213675	0.00150726	0.073	4124	tags=50%, list=20%, signal=62%		REACTOME_PLATELET_AGGREGATION_PLUG_FORMATION	25	-0.441209	-1.40022	0.061657	0.194525	1	3933	tags=32%, list=19%, signal=39%
REACTOME_NUCLEOTIDE_EXCISION_REPAIR	43	0.534035	1.96382	0	0.00184152	0.092	7103	tags=63%, list=34%, signal=95%		REACTOME_PLATELET_ACTIVATION	157	-0.302778	-1.38981	0.0189329	0.200142	1	3963	tags=26%, list=19%, signal=32%
REACTOME_CYTOSOLIC_TRNA_AMINOACYLATION	21	0.628335	1.94157	0.00212314	0.00221043	0.115	7319	tags=86%, list=35%, signal=132%		REACTOME_INHIBITION_OF_INSULIN_SECRETION_BY_ADRENALINE_NORADRENALINE	27	-0.421667	-1.38657	0.0912477	0.201212	1	3392	tags=30%, list=16%, signal=35%
REACTOME_LAGGING_STRAND_SYNTHESIS	19	0.63848	1.94274	0	0.00224293	0.115	5239	tags=63%, list=25%, signal=84%		REACTOME_PLATELET_DEGRANULATION	81	-0.332598	-1.38272	0.0430328	0.202825	1	5168	tags=33%, list=25%, signal=44%
REACTOME_E2F_MEDIATED_REGULATION_OF_DNA_REPLICATION	28	0.577843	1.94316	0	0.00225891	0.114	5870	tags=68%, list=28%, signal=95%		REACTOME_THROMBIN_SIGNALLING_THROUGH_PROTEINASE_ACTIVATED_RECEPTORS	25	-0.419281	-1.36764	0.0981481	0.218038	1	3219	tags=32%, list=16%, signal=38%
REACTOME_HIV1_TRANSCRIPTION_INITIATION	35	0.543077	1.93521	0	0.00235209	0.123	6617	tags=63%, list=32%, signal=92%		REACTOME_NOREPINEPHRINE_NEUROTRANSMITTER_RELEASE_CYCLE	12	-0.518079	-1.36326	0.103774	0.220215	1	2809	tags=42%, list=14%, signal=48%
REACTOME_METABOLISM_OF_AMINO_ACIDS	154	0.412005	1.92876	0	0.00254705	0.135	4974	tags=45%, list=24%, signal=59%		REACTOME_CYTOCHROME_P450_ARRANGED_BY_SUBSTRATE_TYPE	46	-0.369949	-1.35611	0.0784314	0.225619	1	6014	tags=52%, list=29%, signal=73%
REACTOME_APOPTOSIS	124	0.421538	1.92131	0	0.00269736	0.146	4704	tags=40%, list=23%, signal=51%		REACTOME_HORMONE_BIOSYNTHESIS	48	-0.360238	-1.34692	0.072695	0.230621	1	6219	tags=42%, list=30%, signal=59%
REACTOME_RNA_POLYMERASE_I_CHAIN_ELONGATION	28	0.570116	1.92155	0	0.00273381	0.146	4124	tags=46%, list=20%, signal=58%		REACTOME_REGULATION_OF_INSULIN_LIKE_GROWTH_FACTOR_ACTIVITY_BY_INSULIN_LIKE_GROWTH_FACTOR_BINDING_PROTEINS	15	-0.477643	-1.34717	0.133452	0.233445	1	5716	tags=60%, list=28%, signal=83%
REACTOME_PURINE_RIBONUCLEOSIDE_MONOPHOSPHATE_BIOSYNTHESIS	11	0.724727	1.92364	0.00207039	0.00275665	0.144	4245	tags=64%, list=21%, signal=80%		REACTOME_TRAFFICKING_OF_GLUR2_CONTAINING_AMPA_RECEPTORS	16	-0.470617	-1.33846	0.119403	0.234506	1	2911	tags=31%, list=14%, signal=36%
REACTOME_RNA_POLYMERASE_I_TRANSCRIPTION_INITIATION	21	0.617079	1.92195	0	0.00277126	0.146	6461	tags=57%, list=31%, signal=83%		REACTOME_CALCITONIN_LIKE_LIGAND_RECEPTORS	10	-0.544476	-1.34113	0.130261	0.234607	1	1636	tags=40%, list=8%, signal=43%
REACTOME_REV_MEDIATED_NUCLEAR_EXPORT_OF_HIV1_RNA	29	0.566229	1.91269	0	0.0031197	0.171	6079	tags=62%, list=29%, signal=88%		REACTOME_GAMMA_CARBOXYLATION_TRANSPORT_AND_AMINO_TERMINAL_CLEAVAGE_OF_PROTEINS	10	-0.531134	-1.33158	0.13215	0.240486	1	5619	tags=70%, list=27%, signal=96%
REACTOME_NEP_NS2_INTERACTS_WITH_THE_CELLULAR_EXPORT_MACHINERY	27	0.57204	1.91128	0	0.00322843	0.179	6079	tags=63%, list=29%, signal=89%		REACTOME_IONOTROPIC_ACTIVITY_OF_KAINATE_RECEPTORS	11	-0.523542	-1.32782	0.157282	0.242735	1	1185	tags=27%, list=6%, signal=29%
REACTOME_ACTIVATION_OF_CHAPERONES_BY_IRE1_ALPHA	10	0.755535	1.89912	0.00447427	0.00388705	0.211	2129	tags=60%, list=10%, signal=67%
REACTOME_TRANSPORT_OF_THE_SLBP_INDEPENDENT_MATURE_MRNA	30	0.560857	1.89536	0.00217865	0.0039639	0.218	6079	tags=60%, list=29%, signal=85%
REACTOME_MRNA_SPLICING_MINOR_PATHWAY	40	0.515669	1.88533	0	0.00446453	0.239	8425	tags=78%, list=41%, signal=130%
REACTOME_ASSOCIATION_OF_LICENSING_FACTORS_WITH_THE_PREREPLICATIVE_COMPLEX	12	0.707025	1.88268	0.00205761	0.00455973	0.248	3232	tags=58%, list=16%, signal=69%
REACTOME_GLOBAL_GENOMIC_NER	29	0.549616	1.87207	0.002079	0.00486426	0.269	6980	tags=62%, list=34%, signal=94%
REACTOME_NUCLEAR_IMPORT_OF_REV_PROTEIN	28	0.555216	1.87228	0	0.00492359	0.269	6079	tags=57%, list=29%, signal=81%
REACTOME_RNA_POLYMERASE_I_TRANSCRIPTION_TERMINATION	19	0.629503	1.85496	0.00440529	0.00584926	0.316	6461	tags=63%, list=31%, signal=92%
REACTOME_INSULIN_SYNTHESIS_AND_SECRETION	115	0.411032	1.84826	0	0.00638122	0.347	6546	tags=51%, list=32%, signal=75%
REACTOME_BRANCHED_CHAIN_AMINO_ACID_CATABOLISM	16	0.641394	1.83479	0	0.00731266	0.395	1946	tags=44%, list=9%, signal=48%
REACTOME_GLUCOSE_REGULATION_OF_INSULIN_SECRETION	133	0.394093	1.82995	0	0.00744722	0.406	5742	tags=47%, list=28%, signal=64%
REACTOME_RNA_POL_II_CTD_PHOSPHORYLATION_AND_INTERACTION_WITH_CE	23	0.571713	1.83068	0.002	0.00751805	0.406	5244	tags=57%, list=25%, signal=76%
REACTOME_PYRUVATE_METABOLISM_AND_TCA_CYCLE	34	0.518954	1.82451	0.00445434	0.00771103	0.422	6065	tags=56%, list=29%, signal=79%
REACTOME_CDC6_ASSOCIATION_WITH_THE_ORC:ORIGIN_COMPLEX	11	0.698497	1.8144	0.00968992	0.00850031	0.453	3232	tags=64%, list=16%, signal=75%
REACTOME_SYNTHESIS_OF_GPI_ANCHORED_PROTEINS	24	0.566963	1.81193	0.0042735	0.00862953	0.461	5708	tags=50%, list=28%, signal=69%
REACTOME_REGULATION_OF_GLUCOKINASE_BY_GLUCOKINASE_REGULATORY_PROTEIN	27	0.543176	1.81046	0.00413223	0.00866855	0.467	6079	tags=56%, list=29%, signal=79%
REACTOME_TRANSPORT_OF_RIBONUCLEOPROTEINS_INTO_THE_HOST_NUCLEUS	27	0.541513	1.80563	0	0.0090555	0.487	6079	tags=56%, list=29%, signal=79%
REACTOME_FORMATION_OF_ATP_BY_CHEMIOSMOTIC_COUPLING	11	0.707852	1.79569	0.010101	0.00972281	0.523	5024	tags=82%, list=24%, signal=108%
REACTOME_FORMATION_OF_THE_EARLY_ELONGATION_COMPLEX	27	0.539239	1.79599	0.010352	0.00982625	0.523	6493	tags=63%, list=31%, signal=92%
REACTOME_E2F_ENABLED_INHIBITION_OF_PRE_REPLICATION_COMPLEX_FORMATION	9	0.754427	1.79285	0.00656455	0.00989044	0.533	4064	tags=78%, list=20%, signal=97%
REACTOME_MRNA_PROCESSING	29	0.527334	1.77811	0.0043384	0.0112904	0.593	5796	tags=59%, list=28%, signal=81%
REACTOME_INACTIVATION_OF_APC_VIA_DIRECT_INHIBITION_OF_THE_APCOMPLEX	16	0.629097	1.7774	0.0106157	0.0113009	0.6	5114	tags=63%, list=25%, signal=83%
REACTOME_CITRIC_ACID_CYCLE	17	0.601462	1.77152	0.00198413	0.0117679	0.611	5742	tags=53%, list=28%, signal=73%
REACTOME_G2_M_TRANSITION	75	0.420104	1.76999	0	0.0118023	0.616	7202	tags=51%, list=35%, signal=77%
REACTOME_TAT_MEDIATED_HIV1_ELONGATION_ARREST_AND_RECOVERY	27	0.528587	1.76862	0.00826446	0.0118208	0.619	6493	tags=63%, list=31%, signal=92%
REACTOME_MRNA_DECAY_BY_5_TO_3_EXORIBONUCLEASE	13	0.639974	1.76074	0.010989	0.0124945	0.639	4318	tags=54%, list=21%, signal=68%
REACTOME_VPR_MEDIATED_NUCLEAR_IMPORT_OF_PICS	29	0.517898	1.75899	0	0.0126178	0.647	6079	tags=55%, list=29%, signal=78%
REACTOME_APCDC20_MEDIATED_DEGRADATION_OF_CYCLIN_B	16	0.605023	1.74062	0.0116959	0.0145277	0.705	5114	tags=56%, list=25%, signal=75%
REACTOME_MITOCHONDRIAL_TRNA_AMINOACYLATION	18	0.591323	1.73488	0.0107296	0.0150401	0.718	6723	tags=67%, list=32%, signal=99%
REACTOME_POLYMERASE_SWITCHING	13	0.632219	1.72602	0.0107991	0.0163841	0.754	6833	tags=77%, list=33%, signal=115%
REACTOME_REPAIR_SYNTHESIS_OF_PATCH_27_30_BASES_LONG_BY_DNA_POLYMERASE	14	0.618785	1.72427	0.0160966	0.0164686	0.76	4936	tags=57%, list=24%, signal=75%
REACTOME_UNFOLDED_PROTEIN_RESPONSE	19	0.575729	1.72268	0.00814664	0.0166081	0.769	2201	tags=37%, list=11%, signal=41%
REACTOME_DUAL_INCISION_REACTION_IN_TC_NER	23	0.54555	1.71136	0.00821355	0.0182099	0.803	6461	tags=61%, list=31%, signal=88%
REACTOME_PHOSPHORYLATION_OF_THE_APC	15	0.60934	1.70626	0.010142	0.0188413	0.815	5114	tags=60%, list=25%, signal=80%
REACTOME_INTEGRATION_OF_ENERGY_METABOLISM	195	0.349465	1.69869	0	0.0202034	0.836	5742	tags=42%, list=28%, signal=57%
REACTOME_LOSS_OF_NLP_FROM_MITOTIC_CENTROSOMES	56	0.423349	1.68977	0.00207039	0.021552	0.856	7202	tags=52%, list=35%, signal=79%
REACTOME_E2F_TRANSCRIPTIONAL_TARGETS_AT_G1_S	17	0.568704	1.68999	0.01222	0.0216986	0.855	3487	tags=53%, list=17%, signal=64%
REACTOME_REMOVAL_OF_THE_FLAP_INTERMEDIATE	13	0.607191	1.68118	0.0346939	0.0228084	0.881	6833	tags=69%, list=33%, signal=103%
REACTOME_CONVERSION_FROM_APC_CDC20_TO_APC_CDH1_IN_LATE_ANAPHASE	16	0.583139	1.67674	0.014862	0.0235606	0.887	5114	tags=50%, list=25%, signal=66%
REACTOME_DOUBLE_STRAND_BREAK_REPAIR	20	0.549974	1.65869	0.0152174	0.0268504	0.915	6827	tags=60%, list=33%, signal=89%
REACTOME_SYNTHESIS_OF_GLYCOSYLPHOSPHATIDYLINOSITOL	15	0.587777	1.65355	0.0165631	0.0278057	0.931	2771	tags=33%, list=13%, signal=38%
REACTOME_CYCLIN_A1_ASSOCIATED_EVENTS_DURING_G2_M_TRANSITION	13	0.603337	1.65232	0.0125261	0.0278462	0.932	4921	tags=69%, list=24%, signal=91%
REACTOME_DIABETES_PATHWAYS	334	0.318875	1.64317	0	0.0295544	0.945	5768	tags=39%, list=28%, signal=53%
REACTOME_RNA_POLYMERASE_III_TRANSCRIPTION	31	0.469416	1.63248	0.002079	0.0318546	0.956	5409	tags=42%, list=26%, signal=57%
REACTOME_DEADENYLATION_OF_MRNA	22	0.513651	1.62729	0.0185567	0.0329678	0.963	6916	tags=59%, list=33%, signal=89%
REACTOME_ABORTIVE_ELONGATION_OF_HIV1_TRANSCRIPT_IN_THE_ABSENCE_OF_TAT	20	0.517084	1.62203	0.0250522	0.0340051	0.968	7914	tags=75%, list=38%, signal=121%
REACTOME_CENTROSOME_MATURATION	64	0.398804	1.61723	0	0.0351347	0.971	7202	tags=47%, list=35%, signal=72%
REACTOME_UNWINDING_OF_DNA	10	0.648958	1.60769	0.0340426	0.0374305	0.979	4733	tags=60%, list=23%, signal=78%
REACTOME_HOMOLOGOUS_RECOMBINATION_REPAIR	14	0.56974	1.57697	0.0282828	0.0464715	0.992	6827	tags=57%, list=33%, signal=85%
REACTOME_MITOCHONDRIAL_FATTY_ACID_BETA_OXIDATION	10	0.623132	1.57266	0.0389344	0.0474209	0.995	6979	tags=60%, list=34%, signal=90%
REACTOME_ZINC_INFLUX_INTO_CELLS_BY_THE_SLC39_GENES_FAMILY	10	0.617754	1.56663	0.036	0.0489707	0.996	3194	tags=50%, list=15%, signal=59%
REACTOME_SYNTHESIS_AND_INTERCONVERSION_OF_NUCLEOTIDE_DI_AND_TRIPHOSPHATES	16	0.539622	1.5654	0.0311203	0.0490844	0.996	6344	tags=69%, list=31%, signal=99%
REACTOME_MTORC1_MEDIATED_SIGNALLING	11	0.603765	1.54028	0.0526316	0.0583859	0.998	6916	tags=73%, list=33%, signal=109%
REACTOME_POST_TRANSLATIONAL_PROTEIN_MODIFICATION	38	0.416431	1.53718	0.0284553	0.0592939	0.998	4611	tags=37%, list=22%, signal=47%
REACTOME_MEMBRANE_TRAFFICKING	74	0.369434	1.53176	0.00928074	0.06121	0.999	5939	tags=47%, list=29%, signal=66%
REACTOME_RNA_POLYMERASE_III_TRANSCRIPTION_INITIATION	26	0.460111	1.51863	0.0407725	0.06638	0.999	5409	tags=42%, list=26%, signal=57%
REACTOME_METAL_ION_SLC_TRANSPORTERS	23	0.484565	1.51639	0.0406852	0.0665045	0.999	3309	tags=43%, list=16%, signal=52%
REACTOME_REGULATION_OF_PYRUVATE_DEHYDROGENASE_COMPLEX	12	0.57703	1.51642	0.0465116	0.0669857	0.999	4926	tags=50%, list=24%, signal=66%
REACTOME_PEROXISOMAL_LIPID_METABOLISM	19	0.492231	1.51387	0.0347072	0.0671392	0.999	4243	tags=53%, list=21%, signal=66%
REACTOME_MRNA_DECAY_BY_3_TO_5_EXORIBONUCLEASE	9	0.616751	1.50622	0.0606061	0.0700928	0.999	6683	tags=78%, list=32%, signal=115%
REACTOME_GLUCURONIDATION	8	0.635503	1.49113	0.0578512	0.0764906	1	1234	tags=50%, list=6%, signal=53%
REACTOME_ZINC_TRANSPORTATION	17	0.502636	1.48952	0.0476191	0.0769391	1	3309	tags=47%, list=16%, signal=56%
REACTOME_REGULATION_OF_GENE_EXPRESSION_IN_BETA_CELLS	90	0.346492	1.48597	0.00696056	0.0780406	1	6546	tags=42%, list=32%, signal=61%
REACTOME_METABOLISM_OF_CARBOHYDRATES	109	0.323798	1.47497	0.0175824	0.0827708	1	6432	tags=44%, list=31%, signal=64%
REACTOME_DUAL_INCISION_REACTION_IN_GG_NER	17	0.494907	1.47279	0.077551	0.0833047	1	6980	tags=59%, list=34%, signal=89%
REACTOME_VIRAL_MESSENGER_RNA_SYNTHESIS	13	0.548299	1.47152	0.062753	0.0833056	1	5244	tags=54%, list=25%, signal=72%
REACTOME_FANCONI_ANEMIA_PATHWAY	14	0.530763	1.45248	0.0591716	0.0926634	1	5479	tags=57%, list=26%, signal=78%
REACTOME_COPI_MEDIATED_TRANSPORT	9	0.589538	1.44428	0.0810811	0.0963221	1	6741	tags=78%, list=33%, signal=115%
REACTOME_METABOLISM_OF_NITRIC_OXIDE	10	0.575373	1.445	0.0890269	0.0965939	1	8282	tags=80%, list=40%, signal=133%
REACTOME_REMOVAL_OF_THE_FLAP_INTERMEDIATE_FROM_THE_C_STRAND	9	0.595565	1.43852	0.0912621	0.0980401	1	6833	tags=67%, list=33%, signal=99%
REACTOME_MICRORNA_BIOGENESIS	17	0.496966	1.43868	0.0697211	0.0986592	1	7914	tags=65%, list=38%, signal=105%
REACTOME_AMINO_ACID_SYNTHESIS_AND_INTERCONVERSION	12	0.540153	1.43014	0.10559	0.102579	1	2986	tags=42%, list=14%, signal=49%
REACTOME_APOPTOSIS_INDUCED_DNA_FRAGMENTATION	11	0.563023	1.4267	0.0866808	0.104156	1	2650	tags=27%, list=13%, signal=31%
REACTOME_CASPASE_MEDIATED_CLEAVAGE_OF_CYTOSKELETAL_PROTEINS	11	0.539646	1.42456	0.100823	0.104871	1	747	tags=27%, list=4%, signal=28%
REACTOME_REGULATION_OF_INSULIN_SECRETION	181	0.293763	1.41568	0.00626305	0.108941	1	5742	tags=39%, list=28%, signal=53%
REACTOME_AKT_PHOSPHORYLATES_TARGETS_IN_THE_CYTOSOL	13	0.519167	1.41629	0.0869565	0.10934	1	1866	tags=23%, list=9%, signal=25%
REACTOME_RNA_POLYMERASE_III_TRANSCRIPTION_TERMINATION	15	0.494642	1.39888	0.106855	0.11893	1	7144	tags=67%, list=35%, signal=102%
REACTOME_PI3K_AKT_SIGNALLING	35	0.38571	1.37588	0.0612245	0.134605	1	1939	tags=20%, list=9%, signal=22%
REACTOME_REMOVAL_OF_DNA_PATCH_CONTAINING_ABASIC_RESIDUE	14	0.492792	1.37395	0.102397	0.13515	1	8099	tags=64%, list=39%, signal=106%
REACTOME_PYRUVATE_METABOLISM	18	0.462634	1.36774	0.118126	0.139086	1	5203	tags=50%, list=25%, signal=67%
REACTOME_APOPTOTIC_CLEAVAGE_OF_CELL_ADHESION_PROTEINS	10	0.543254	1.33189	0.152866	0.168449	1	2632	tags=30%, list=13%, signal=34%
REACTOME_BASE_EXCISION_REPAIR	17	0.446782	1.32606	0.130604	0.172702	1	8099	tags=59%, list=39%, signal=97%
REACTOME_RNA_POLYMERASE_III_TRANSCRIPTION_INITIATION_FROM_TYPE_2_PROMOTER	17	0.468007	1.32107	0.136364	0.176193	1	7103	tags=53%, list=34%, signal=81%
REACTOME_GLUCOSE_TRANSPORT	36	0.367255	1.31033	0.0993378	0.184235	1	6079	tags=47%, list=29%, signal=67%
REACTOME_RNA_POLYMERASE_III_TRANSCRIPTION_INITIATION_FROM_TYPE_3_PROMOTER	20	0.42527	1.31121	0.152401	0.184388	1	5409	tags=45%, list=26%, signal=61%
REACTOME_PREFOLDIN_MEDIATED_TRANSFER_OF_SUBSTRATE_TO_CCT_TRIC	26	0.40642	1.30614	0.128205	0.187146	1	6809	tags=69%, list=33%, signal=103%
REACTOME_INTRINSIC_PATHWAY_FOR_APOPTOSIS	28	0.388966	1.2999	0.144654	0.191924	1	1464	tags=21%, list=7%, signal=23%
REACTOME_APOPTOTIC_EXECUTION_PHASE	45	0.345855	1.29545	0.112554	0.195351	1	747	tags=11%, list=4%, signal=12%
REACTOME_VITAMIN_B5_(PANTOTHENATE)_METABOLISM	11	0.503233	1.29391	0.171946	0.195527	1	1703	tags=18%, list=8%, signal=20%
REACTOME_DARPP32_EVENTS	24	0.399562	1.29117	0.144766	0.195861	1	7314	tags=46%, list=35%, signal=71%
REACTOME_TRANSFORMATION_OF_LANOSTEROL_TO_CHOLESTEROL	9	0.537908	1.2921	0.163399	0.196301	1	3206	tags=33%, list=15%, signal=39%
REACTOME_TRIACYLGLYCERIDE_BIOSYNTHESIS	13	0.466256	1.2818	0.162887	0.202521	1	3944	tags=31%, list=19%, signal=38%
REACTOME_REGULATION_OF_BETA_CELL_DEVELOPMENT	102	0.291421	1.28244	0.0762527	0.203039	1	6546	tags=40%, list=32%, signal=59%
REACTOME_GENES_INVOLVED_IN_APOPTOTIC_CLEAVAGE_OF_CELLULAR_PROTEINS	34	0.355419	1.23817	0.150424	0.249523	1	747	tags=12%, list=4%, signal=12%

## Sheet: twin pair ID 2
Up-regulated Twin Pair ID 2 twinA										Up-regulated in Twin Pair ID 2 twinB
Gene Sets Name	Gene Sets Size	Enrichment Score	Normalized Enrichment Score	NOM p-val	FDR q-val	FWER p-val	RANK AT MAX	LEADING EDGE		Gene Sets Name	Gene Sets Size	Enrichment Score	Normalized Enrichment Score	NOM p-val	FDR q-val	FWER p-val	RANK AT MAX	LEADING EDGE
REACTOME_GPCR_LIGAND_BINDING	366	0.501053	2.37732	0	0	0	5081	tags=53%, list=25%, signal=69%		REACTOME_CELL_CYCLE_MITOTIC	282	-0.567997	-3.08627	0	0	0	6035	tags=60%, list=29%, signal=83%
REACTOME_G_ALPHA_I_SIGNALLING_EVENTS	164	0.535225	2.32936	0	0	0	5812	tags=59%, list=28%, signal=82%		REACTOME_MITOTIC_M_M_G1_PHASES	146	-0.619017	-3.06103	0	0	0	4377	tags=52%, list=21%, signal=66%
REACTOME_AMINE_LIGAND_BINDING_RECEPTORS	42	0.625271	2.1921	0	0.00011777	0.001	5870	tags=69%, list=28%, signal=96%		REACTOME_MITOTIC_PROMETAPHASE	83	-0.647024	-2.86235	0	0	0	4377	tags=59%, list=21%, signal=75%
REACTOME_CLASS_A1_RHODOPSIN_LIKE_RECEPTORS	269	0.486255	2.22947	0	0.000147213	0.001	5870	tags=58%, list=28%, signal=80%		REACTOME_TRANSCRIPTION	171	-0.553488	-2.80244	0	0	0	5659	tags=53%, list=27%, signal=73%
REACTOME_CLASS_B2_SECRETIN_FAMILY_RECEPTORS	82	0.566116	2.24616	0	0.000196283	0.001	4849	tags=52%, list=23%, signal=68%		REACTOME_RNA_POLYMERASE_I_III_AND_MITOCHONDRIAL_TRANSCRIPTION	99	-0.599408	-2.78694	0	0	0	4923	tags=56%, list=24%, signal=73%
REACTOME_PEPTIDE_LIGAND_BINDING_RECEPTORS	163	0.483174	2.12996	0	0.000289137	0.003	5545	tags=58%, list=27%, signal=78%		REACTOME_RNA_POLYMERASE_I_PROMOTER_CLEARANCE	64	-0.648012	-2.76029	0	0	0	5413	tags=69%, list=26%, signal=93%
REACTOME_DOWNSTREAM_EVENTS_IN_GPCR_SIGNALING	420	0.427492	2.04891	0	0.00117563	0.013	5109	tags=43%, list=25%, signal=56%		REACTOME_SYNTHESIS_OF_DNA	86	-0.592915	-2.71749	0	0	0	6009	tags=58%, list=29%, signal=82%
REACTOME_OLFACTORY_SIGNALING_PATHWAY	321	0.426184	1.9933	0	0.00237491	0.03	8571	tags=60%, list=41%, signal=101%		REACTOME_CELL_CYCLE_CHECKPOINTS	101	-0.584929	-2.71294	0	0	0	6035	tags=59%, list=29%, signal=83%
REACTOME_NCAM1_INTERACTIONS	44	0.560839	1.95332	0.00145773	0.00403377	0.057	6435	tags=80%, list=31%, signal=115%		REACTOME_TELOMERE_MAINTENANCE	65	-0.620605	-2.67146	0	0	0	5266	tags=63%, list=25%, signal=84%
REACTOME_G_ALPHA_S_SIGNALLING_EVENTS	117	0.447079	1.89155	0	0.00727109	0.136	4497	tags=40%, list=22%, signal=51%		REACTOME_G1_S_TRANSITION	96	-0.577206	-2.66998	0	0	0	6035	tags=58%, list=29%, signal=82%
REACTOME_NA_CL_DEPENDENT_NEUROTRANSMITTER_TRANSPORTERS	18	0.6641	1.90327	0.00167224	0.00758882	0.119	5056	tags=67%, list=24%, signal=88%		REACTOME_DNA_REPLICATION_PRE_INITIATION	74	-0.608422	-2.64922	0	0	0	6009	tags=59%, list=29%, signal=83%
REACTOME_SIGNALING_BY_PDGF	59	0.506347	1.89216	0.00142653	0.00787857	0.135	4373	tags=36%, list=21%, signal=45%		REACTOME_RNA_POLYMERASE_I_PROMOTER_OPENING	44	-0.663939	-2.61876	0	0	0	5266	tags=70%, list=25%, signal=94%
REACTOME_CALCITONIN_LIKE_LIGAND_RECEPTORS	10	0.759643	1.85646	0.00159744	0.010294	0.202	2908	tags=60%, list=14%, signal=70%		REACTOME_S_PHASE	100	-0.553045	-2.57817	0	0	0	6035	tags=57%, list=29%, signal=80%
REACTOME_FORMATION_OF_FIBRIN_CLOT_CLOTTING_CASCADE	32	0.541572	1.81041	0	0.0175278	0.344	6164	tags=59%, list=30%, signal=84%		REACTOME_DNA_REPAIR	92	-0.553244	-2.55924	0	0	0	7014	tags=68%, list=34%, signal=103%
REACTOME_NCAM_SIGNALING_FOR_NEURITE_OUT_GROWTH	65	0.472513	1.76556	0	0.0284594	0.512	6435	tags=65%, list=31%, signal=93%		REACTOME_METABOLISM_OF_RNA	89	-0.569704	-2.55775	0	0	0	6240	tags=65%, list=30%, signal=93%
REACTOME_INTRINSIC_PATHWAY	17	0.608569	1.73784	0.00652529	0.0339508	0.626	5370	tags=71%, list=26%, signal=95%		REACTOME_M_G1_TRANSITION	60	-0.603438	-2.55481	0	0	0	6009	tags=57%, list=29%, signal=80%
REACTOME_REGULATION_OF_INSULIN_LIKE_GROWTH_FACTOR_ACTIVITY_BY_INSULIN_LIKE_GROWTH_FACTOR_BINDING_PROTEINS	15	0.633427	1.73912	0.00991735	0.0354431	0.617	4988	tags=67%, list=24%, signal=88%		REACTOME_PACKAGING_OF_TELOMERE_ENDS	38	-0.681125	-2.54839	0	0	0	5266	tags=76%, list=25%, signal=102%
REACTOME_AXON_GUIDANCE	154	0.391492	1.71316	0	0.0420272	0.724	5220	tags=39%, list=25%, signal=52%		REACTOME_FORMATION_AND_MATURATION_OF_MRNA_TRANSCRIPT	140	-0.51733	-2.52423	0	0	0	7401	tags=61%, list=36%, signal=94%
REACTOME_G_ALPHA_Q_SIGNALLING_EVENTS	146	0.394549	1.70371	0	0.0440201	0.76	5870	tags=48%, list=28%, signal=66%		REACTOME_CDT1_ASSOCIATION_WITH_THE_CDC6_ORC_ORIGIN_COMPLEX	51	-0.61574	-2.51916	0	0	0	6009	tags=59%, list=29%, signal=83%
REACTOME_PLATELET_ADHESION_TO_EXPOSED_COLLAGEN	14	0.623998	1.6886	0.00841751	0.0496241	0.813	3850	tags=64%, list=19%, signal=79%		REACTOME_PROCESSING_OF_CAPPED_INTRON_CONTAINING_PRE_MRNA	129	-0.517173	-2.48825	0	0	0	7401	tags=61%, list=36%, signal=95%
REACTOME_GAP_JUNCTION_TRAFFICKING	25	0.537343	1.64647	0.009375	0.0594356	0.928	2171	tags=32%, list=10%, signal=36%		REACTOME_ORC1_REMOVAL_FROM_CHROMATIN	62	-0.590383	-2.48436	0	0	0	6009	tags=56%, list=29%, signal=79%
REACTOME_SEROTONIN_RECEPTORS	12	0.640469	1.6493	0.0181518	0.0602361	0.92	1541	tags=42%, list=7%, signal=45%		REACTOME_G2_M_TRANSITION	75	-0.553142	-2.47278	0	0	0	5689	tags=55%, list=27%, signal=75%
REACTOME_GLUCAGON_TYPE_LIGAND_RECEPTORS	31	0.504823	1.66493	0.0122699	0.0618569	0.889	5073	tags=42%, list=25%, signal=55%		REACTOME_REGULATION_OF_APC_ACTIVATORS_BETWEEN_G1_S_AND_EARLY_ANAPHASE	67	-0.574303	-2.45968	0	0	0	6014	tags=57%, list=29%, signal=80%
REACTOME_AMINE_DERIVED_HORMONES	12	0.63963	1.65133	0.0113086	0.0619246	0.916	5246	tags=83%, list=25%, signal=112%		REACTOME_G2_M_CHECKPOINTS	37	-0.63748	-2.41619	0	0	0	6230	tags=76%, list=30%, signal=108%
REACTOME_SLC_MEDIATED_TRANSMEMBRANE_TRANSPORT	160	0.378178	1.65758	0.00122399	0.063306	0.902	6843	tags=48%, list=33%, signal=71%		REACTOME_LATE_PHASE_OF_HIV_LIFE_CYCLE	82	-0.545974	-2.41166	0	0	0	6960	tags=67%, list=34%, signal=101%
REACTOME_AMINE_COMPOUND_SLC_TRANSPORTERS	28	0.511381	1.65196	0.0109034	0.0642579	0.915	5302	tags=61%, list=26%, signal=82%		REACTOME_RNA_POLYMERASE_II_TRANSCRIPTION	85	-0.532583	-2.41095	0	0	0	7500	tags=67%, list=36%, signal=105%
REACTOME_GAP_JUNCTION_ASSEMBLY	18	0.565796	1.63394	0.0172684	0.0660215	0.957	5730	tags=61%, list=28%, signal=84%		REACTOME_ACTIVATION_OF_ATR_IN_RESPONSE_TO_REPLICATION_STRESS	33	-0.637265	-2.40387	0	0	0	6230	tags=76%, list=30%, signal=108%
REACTOME_AMINO_ACID_TRANSPORT_ACROSS_THE_PLASMA_MEMBRANE	29	0.503944	1.61356	0.0191693	0.0761935	0.977	3945	tags=41%, list=19%, signal=51%		REACTOME_CENTROSOME_MATURATION	64	-0.556814	-2.39963	0	0	0	5689	tags=55%, list=27%, signal=75%
REACTOME_GS_ALPHA_MEDIATED_EVENTS_IN_GLUCAGON_SIGNALLING	24	0.516672	1.59961	0.01875	0.0806834	0.988	4741	tags=42%, list=23%, signal=54%		REACTOME_CDC20_PHOSPHO_APC_MEDIATED_DEGRADATION_OF_CYCLIN_A	59	-0.567974	-2.37953	0	0	0	7187	tags=66%, list=35%, signal=101%
REACTOME_NUCLEOTIDE_LIKE_PURINERGIC_RECEPTORS	14	0.588684	1.60314	0.02589	0.0807319	0.988	2248	tags=43%, list=11%, signal=48%		REACTOME_AUTODEGRADATION_OF_CDH1_BY_CDH1_APC	55	-0.577196	-2.37372	0	0	0	7187	tags=67%, list=35%, signal=103%
REACTOME_GLUCOSE_AND_OTHER_SUGAR_SLC_TRANSPORTERS	79	0.398683	1.59028	0.00547945	0.0852274	0.991	6843	tags=51%, list=33%, signal=75%		REACTOME_SNRNP_ASSEMBLY	45	-0.597192	-2.35377	0	0	0	6875	tags=76%, list=33%, signal=113%
REACTOME_INTEGRIN_CELL_SURFACE_INTERACTIONS	76	0.401392	1.58364	0.00569801	0.0879008	0.993	5950	tags=46%, list=29%, signal=64%		REACTOME_ELONGATION_AND_PROCESSING_OF_CAPPED_TRANSCRIPTS	123	-0.500262	-2.34484	0	0	0	7401	tags=58%, list=36%, signal=89%
REACTOME_CLASS_C3_METABOTROPIC_GLUTAMATE_PHEROMONE_RECEPTORS	15	0.576062	1.57781	0.0406886	0.0893359	0.994	5933	tags=80%, list=29%, signal=112%		REACTOME_HIV_INFECTION	172	-0.460293	-2.34	0	0	0	7740	tags=65%, list=37%, signal=102%
REACTOME_AMINO_ACID_AND_OLIGOPEPTIDE_SLC_TRANSPORTERS	45	0.442453	1.57104	0.0132548	0.0920873	0.995	5246	tags=44%, list=25%, signal=59%		REACTOME_CYCLIN_E_ASSOCIATED_EVENTS_DURING_G1_S_TRANSITION_	57	-0.564157	-2.33127	0	0	0	7187	tags=61%, list=35%, signal=94%
REACTOME_INORGANIC_CATION_ANION_SLC_TRANSPORTERS	88	0.388584	1.56372	0.00684931	0.0947816	0.997	4496	tags=35%, list=22%, signal=45%		REACTOME_STABILIZATION_OF_P53	44	-0.566768	-2.23724	0	8.20448e-05	0.002	7722	tags=64%, list=37%, signal=101%
REACTOME_CHEMOKINE_RECEPTORS_BIND_CHEMOKINES	49	0.425529	1.54352	0.00732064	0.107861	0.999	4011	tags=41%, list=19%, signal=51%		REACTOME_ACTIVATION_OF_THE_PRE_REPLICATIVE_COMPLEX	29	-0.640016	-2.24406	0	8.40459e-05	0.002	5546	tags=69%, list=27%, signal=94%
REACTOME_OPSINS	6	0.723498	1.53326	0.0394265	0.114146	1	5724	tags=83%, list=28%, signal=115%		REACTOME_VIF_MEDIATED_DEGRADATION_OF_APOBEC3G	45	-0.567116	-2.25978	0	8.61471e-05	0.002	7722	tags=64%, list=37%, signal=103%
REACTOME_FGFR_LIGAND_BINDING_AND_ACTIVATION	26	0.481715	1.51391	0.0307942	0.129968	1	6481	tags=62%, list=31%, signal=89%		REACTOME_SCF_BETA_TRCP_MEDIATED_DEGRADATION_OF_EMI1	47	-0.565627	-2.26415	0	8.8356e-05	0.002	7722	tags=64%, list=37%, signal=102%
REACTOME_BILE_SALT_AND_ORGANIC_ANION_SLC_TRANSPORTERS	12	0.578469	1.49284	0.0495868	0.148716	1	3637	tags=42%, list=18%, signal=51%		REACTOME_HIV_LIFE_CYCLE	95	-0.496032	-2.27774	0	9.06811e-05	0.002	6960	tags=65%, list=34%, signal=98%
REACTOME_PLATELET_DEGRANULATION	81	0.36483	1.47789	0.0128023	0.161903	1	5370	tags=33%, list=26%, signal=45%		REACTOME_SIGNALING_BY_WNT	56	-0.550831	-2.28904	0	9.3132e-05	0.002	7548	tags=63%, list=36%, signal=98%
REACTOME_ENDOGENOUS_STEROLS	14	0.546234	1.46691	0.0662359	0.167581	1	1585	tags=36%, list=8%, signal=39%		REACTOME_MRNA_SPLICING	100	-0.494599	-2.29186	0	9.5719e-05	0.002	8147	tags=66%, list=39%, signal=108%
REACTOME_PHOSPHOLIPASE_CMEDIATED_CASCADE	22	0.498342	1.46928	0.0458136	0.168718	1	4784	tags=55%, list=23%, signal=71%		REACTOME_TRANSPORT_OF_MATURE_MRNA_DERIVED_FROM_AN_INTRON_CONTAINING_TRANSCRIPT	48	-0.582453	-2.30676	0	9.84538e-05	0.002	6780	tags=71%, list=33%, signal=105%
REACTOME_SHCMEDIATED_CASCADE	20	0.483944	1.43173	0.0580645	0.181208	1	4784	tags=50%, list=23%, signal=65%		REACTOME_P53_INDEPENDENT_DNA_DAMAGE_RESPONSE	42	-0.579967	-2.22972	0	0.000125434	0.003	7722	tags=67%, list=37%, signal=106%
REACTOME_CYTOSOLIC_SULFONATION_OF_SMALL_MOLECULES	9	0.595999	1.44204	0.0669935	0.1834	1	6003	tags=56%, list=29%, signal=78%		REACTOME_SCF_SKP2_MEDIATED_DEGRADATION_OF_P27_P21	51	-0.546752	-2.21675	0	0.000161353	0.004	7548	tags=61%, list=36%, signal=95%
REACTOME_RECYCLING_OF_BILE_ACIDS_AND_SALTS	10	0.583557	1.43239	0.0759076	0.184049	1	2487	tags=30%, list=12%, signal=34%		REACTOME_E2F_MEDIATED_REGULATION_OF_DNA_REPLICATION	28	-0.619847	-2.20699	0	0.000197767	0.005	4841	tags=68%, list=23%, signal=88%
REACTOME_G_PROTEIN_ACTIVATION	25	0.461252	1.43542	0.0646154	0.184249	1	4184	tags=32%, list=20%, signal=40%		REACTOME_BRANCHED_CHAIN_AMINO_ACID_CATABOLISM	16	-0.722231	-2.18215	0	0.000290579	0.008	3818	tags=44%, list=18%, signal=54%
REACTOME_INITIAL_TRIGGERING_OF_COMPLEMENT	15	0.524771	1.44422	0.0721476	0.184459	1	1981	tags=47%, list=10%, signal=52%		REACTOME_TRANSCRIPTION_OF_THE_HIV_GENOME	53	-0.536599	-2.19282	0	0.000296633	0.008	6960	tags=64%, list=34%, signal=96%
REACTOME_DOPAMINE_NEUROTRANSMITTER_RELEASE_CYCLE	14	0.534757	1.44923	0.0738255	0.186657	1	5056	tags=50%, list=24%, signal=66%		REACTOME_TRANSPORT_OF_THE_SLBP_INDEPENDENT_MATURE_MRNA	30	-0.602358	-2.19324	0	0.000302944	0.008	6780	tags=77%, list=33%, signal=114%
REACTOME_FRS2MEDIATED_CASCADE	26	0.458587	1.44571	0.048855	0.186687	1	6481	tags=62%, list=31%, signal=89%		REACTOME_LOSS_OF_NLP_FROM_MITOTIC_CENTROSOMES	56	-0.534074	-2.1996	0	0.00030953	0.008	5689	tags=50%, list=27%, signal=69%
REACTOME_STRIATED_MUSCLE_CONTRACTION	30	0.440086	1.43556	0.049922	0.187902	1	5789	tags=53%, list=28%, signal=74%		REACTOME_METABOLISM_OF_MRNA	44	-0.551961	-2.16514	0	0.000342214	0.01	5946	tags=61%, list=29%, signal=86%
REACTOME_MUSCLE_CONTRACTION	48	0.388435	1.41306	0.0443491	0.201428	1	5789	tags=50%, list=28%, signal=69%		REACTOME_RNA_POLYMERASE_I_CHAIN_ELONGATION	28	-0.625651	-2.16626	0	0.000349059	0.01	4797	tags=57%, list=23%, signal=74%
REACTOME_GAMMA_CARBOXYLATION_TRANSPORT_AND_AMINO_TERMINAL_CLEAVAGE_OF_PROTEINS	10	0.565615	1.39307	0.099026	0.204945	1	5829	tags=70%, list=28%, signal=97%		REACTOME_HIV1_TRANSCRIPTION_INITIATION	35	-0.57756	-2.13562	0	0.000542123	0.016	5631	tags=60%, list=27%, signal=82%
REACTOME_COMMON_PATHWAY	14	0.519446	1.3952	0.0993378	0.205703	1	9522	tags=86%, list=46%, signal=159%		REACTOME_REGULATION_OF_ORNITHINE_DECARBOXYLASE	46	-0.528207	-2.12138	0	0.000636949	0.019	7722	tags=63%, list=37%, signal=100%
REACTOME_THROMBOXANE_SIGNALLING_THROUGH_TP_RECEPTOR	21	0.468349	1.39714	0.0776397	0.20668	1	3856	tags=29%, list=19%, signal=35%		REACTOME_FANCONI_ANEMIA_PATHWAY	14	-0.720356	-2.11851	0	0.000658487	0.02	4989	tags=71%, list=24%, signal=94%
REACTOME_CRMPS_IN_SEMA3A_SIGNALING	16	0.502806	1.40522	0.0787781	0.207293	1	4334	tags=44%, list=21%, signal=55%		REACTOME_NUCLEAR_IMPORT_OF_REV_PROTEIN	28	-0.576522	-2.08563	0	0.00116341	0.036	6780	tags=71%, list=33%, signal=106%
REACTOME_COMPLEMENT_CASCADE	22	0.462598	1.39954	0.084127	0.207315	1	1981	tags=36%, list=10%, signal=40%		REACTOME_ASSOCIATION_OF_LICENSING_FACTORS_WITH_THE_PREREPLICATIVE_COMPLEX	12	-0.745423	-2.08886	0	0.00118456	0.036	3584	tags=75%, list=17%, signal=91%
REACTOME_GLUCAGON_SIGNALING_IN_METABOLIC_REGULATION	31	0.430572	1.40041	0.0796325	0.209904	1	4741	tags=39%, list=23%, signal=50%		REACTOME_MRNA_3_END_PROCESSING	33	-0.561626	-2.07678	0	0.00133683	0.042	8147	tags=82%, list=39%, signal=135%
REACTOME_ADENYLATE_CYCLASE_ACTIVATING_PATHWAY	10	0.565011	1.37788	0.0838816	0.217361	1	4741	tags=60%, list=23%, signal=78%		REACTOME_CDC6_ASSOCIATION_WITH_THE_ORC:ORIGIN_COMPLEX	11	-0.771292	-2.0708	0	0.00138475	0.045	3584	tags=82%, list=17%, signal=99%
REACTOME_NEUROTRANSMITTER_RELEASE_CYCLE	28	0.427465	1.37351	0.0942249	0.219601	1	5056	tags=43%, list=24%, signal=57%		REACTOME_VPR_MEDIATED_NUCLEAR_IMPORT_OF_PICS	29	-0.57819	-2.0733	0	0.00140863	0.045	6780	tags=76%, list=33%, signal=113%
REACTOME_DEPOLARIZATION_OF_THE_PRESYNAPTIC_TERMINAL_TRIGGERS_THE_OPENING_OF_CALCIUM_CHANNELS	12	0.53413	1.37887	0.112745	0.219688	1	2273	tags=50%, list=11%, signal=56%		REACTOME_NEP_NS2_INTERACTS_WITH_THE_CELLULAR_EXPORT_MACHINERY	27	-0.596812	-2.06231	0	0.00159566	0.052	6780	tags=78%, list=33%, signal=116%
										REACTOME_DNA_STRAND_ELONGATION	29	-0.576278	-2.06075	0	0.00159641	0.053	7033	tags=69%, list=34%, signal=104%
										REACTOME_ACTIVATED_TLR4_SIGNALLING	22	-0.6178	-2.05651	0	0.00165584	0.056	3740	tags=41%, list=18%, signal=50%
										REACTOME_DEADENYLATION_OF_MRNA	22	-0.597433	-2.03494	0.00280899	0.00177623	0.066	7533	tags=77%, list=36%, signal=121%
										REACTOME_TRANSPORT_OF_RIBONUCLEOPROTEINS_INTO_THE_HOST_NUCLEUS	27	-0.592768	-2.03627	0	0.00180274	0.066	6780	tags=78%, list=33%, signal=116%
										REACTOME_TRANSCRIPTION_COUPLED_NER	38	-0.530083	-2.04209	0	0.00180469	0.063	7014	tags=63%, list=34%, signal=95%
										REACTOME_TOLL_LIKE_RECEPTOR_9_CASCADE	22	-0.603924	-2.02749	0	0.00182853	0.069	3740	tags=41%, list=18%, signal=50%
										REACTOME_REV_MEDIATED_NUCLEAR_EXPORT_OF_HIV1_RNA	29	-0.56826	-2.03692	0	0.00183006	0.066	6780	tags=72%, list=33%, signal=108%
										REACTOME_DOUBLE_STRAND_BREAK_REPAIR	20	-0.636548	-2.03933	0	0.0018318	0.065	7000	tags=90%, list=34%, signal=136%
										REACTOME_HOST_INTERACTIONS_OF_HIV_FACTORS	115	-0.430606	-2.04261	0	0.00183334	0.063	7740	tags=61%, list=37%, signal=97%
										REACTOME_CHOLESTEROL_BIOSYNTHESIS	19	-0.639117	-2.02861	0	0.00185503	0.069	4970	tags=63%, list=24%, signal=83%
										REACTOME_NUCLEOTIDE_EXCISION_REPAIR	43	-0.518789	-2.01261	0	0.00221477	0.083	7014	tags=60%, list=34%, signal=91%
										REACTOME_RNA_POLYMERASE_I_TRANSCRIPTION_INITIATION	21	-0.610232	-2.011	0	0.00223176	0.085	5413	tags=62%, list=26%, signal=84%
										REACTOME_TRNA_AMINOACYLATION	36	-0.527828	-2.00442	0	0.00239346	0.092	7364	tags=69%, list=36%, signal=108%
										REACTOME_GLOBAL_GENOMIC_NER	29	-0.563741	-1.9863	0	0.00278633	0.106	7014	tags=66%, list=34%, signal=99%
										REACTOME_TOLL_RECEPTOR_CASCADES	78	-0.438336	-1.98157	0	0.00289646	0.112	4635	tags=37%, list=22%, signal=48%
										REACTOME_MRNA_SPLICING_MINOR_PATHWAY	40	-0.507731	-1.97668	0	0.00302354	0.119	6954	tags=55%, list=34%, signal=83%
										REACTOME_ELECTRON_TRANSPORT_CHAIN	57	-0.467999	-1.94969	0	0.00372369	0.145	6451	tags=49%, list=31%, signal=71%
										REACTOME_TOLL_LIKE_RECEPTOR_4_CASCADE	26	-0.564846	-1.94682	0	0.00374424	0.148	3740	tags=42%, list=18%, signal=52%
										REACTOME_CASPASE_MEDIATED_CLEAVAGE_OF_CYTOSKELETAL_PROTEINS	11	-0.708351	-1.89241	0	0.00611473	0.233	1881	tags=36%, list=9%, signal=40%
										REACTOME_RNA_POLYMERASE_I_TRANSCRIPTION_TERMINATION	19	-0.603299	-1.89579	0.0027027	0.00612684	0.228	4797	tags=53%, list=23%, signal=68%
										REACTOME_E2F_ENABLED_INHIBITION_OF_PRE_REPLICATION_COMPLEX_FORMATION	9	-0.740971	-1.89399	0.00527705	0.00614337	0.232	3172	tags=78%, list=15%, signal=92%
										REACTOME_MYD88_CASCADE	18	-0.599034	-1.89118	0.00268817	0.0062093	0.239	3740	tags=39%, list=18%, signal=47%
										REACTOME_LAGGING_STRAND_SYNTHESIS	19	-0.580669	-1.88566	0.00277778	0.0064581	0.251	7033	tags=68%, list=34%, signal=104%
										REACTOME_RNA_POLYMERASE_I_PROMOTER_ESCAPE	18	-0.609931	-1.88263	0.00544959	0.0066088	0.261	4797	tags=56%, list=23%, signal=72%
										REACTOME_HOMOLOGOUS_RECOMBINATION_REPAIR	14	-0.649471	-1.87707	0.00261097	0.00682909	0.273	6536	tags=86%, list=32%, signal=125%
										REACTOME_MEMBRANE_TRAFFICKING	74	-0.422625	-1.87218	0	0.00728637	0.294	7744	tags=65%, list=37%, signal=103%
										REACTOME_RECRUITMENT_OF_NUMA_TO_MITOTIC_CENTROSOMES	10	-0.693193	-1.84668	0	0.00946145	0.367	5401	tags=80%, list=26%, signal=108%
										REACTOME_RNA_POLYMERASE_III_TRANSCRIPTION	31	-0.504251	-1.83778	0	0.0102606	0.395	4600	tags=42%, list=22%, signal=54%
										REACTOME_MRNA_DECAY_BY_5_TO_3_EXORIBONUCLEASE	13	-0.646866	-1.83046	0.00815217	0.0109833	0.42	5567	tags=77%, list=27%, signal=105%
										REACTOME_HIV1_TRANSCRIPTION_ELONGATION	36	-0.484624	-1.83227	0.00615385	0.0110225	0.418	7401	tags=61%, list=36%, signal=95%
										REACTOME_GLUCURONIDATION	8	-0.752679	-1.82508	0.00746269	0.0112799	0.433	1992	tags=50%, list=10%, signal=55%
										REACTOME_GOLGI_ASSOCIATED_VESICLE_BIOGENESIS	51	-0.442475	-1.81859	0.00337838	0.0117228	0.452	5353	tags=41%, list=26%, signal=55%
										REACTOME_CLATHRIN_DERIVED_VESICLE_BUDDING	58	-0.438519	-1.81474	0	0.0117512	0.456	5353	tags=41%, list=26%, signal=56%
										REACTOME_GENE_EXPRESSION	383	-0.329085	-1.81014	0	0.0120904	0.471	7401	tags=51%, list=36%, signal=79%
										REACTOME_RNA_POL_II_CTD_PHOSPHORYLATION_AND_INTERACTION_WITH_CE	23	-0.52768	-1.81029	0.00268817	0.0121977	0.47	5337	tags=48%, list=26%, signal=64%
										REACTOME_CYCLIN_A1_ASSOCIATED_EVENTS_DURING_G2_M_TRANSITION	13	-0.630559	-1.80008	0.00269542	0.0130903	0.507	6689	tags=85%, list=32%, signal=125%
										REACTOME_INACTIVATION_OF_APC_VIA_DIRECT_INHIBITION_OF_THE_APCOMPLEX	16	-0.589766	-1.80096	0.0100251	0.0131191	0.502	7059	tags=88%, list=34%, signal=133%
										REACTOME_EXTENSION_OF_TELOMERES	27	-0.506368	-1.79568	0.010989	0.0133289	0.52	7033	tags=63%, list=34%, signal=95%
										REACTOME_SYNTHESIS_OF_GLYCOSYLPHOSPHATIDYLINOSITOL	15	-0.58932	-1.79358	0.0138889	0.0134043	0.526	4280	tags=60%, list=21%, signal=76%
										REACTOME_FORMATION_OF_THE_EARLY_ELONGATION_COMPLEX	27	-0.507249	-1.77657	0.00284091	0.0154671	0.571	6065	tags=52%, list=29%, signal=73%
										REACTOME_APCDC20_MEDIATED_DEGRADATION_OF_CYCLIN_B	16	-0.582556	-1.76873	0.00555556	0.0166476	0.603	7059	tags=88%, list=34%, signal=133%
										REACTOME_UNFOLDED_PROTEIN_RESPONSE	19	-0.555412	-1.76538	0.0111421	0.0168362	0.615	5003	tags=53%, list=24%, signal=69%
										REACTOME_SYNTHESIS_OF_GPI_ANCHORED_PROTEINS	24	-0.50593	-1.75669	0.00828729	0.0177549	0.642	4280	tags=50%, list=21%, signal=63%
										REACTOME_PHOSPHORYLATION_OF_THE_APC	15	-0.599847	-1.74867	0.00826446	0.0189032	0.666	7059	tags=93%, list=34%, signal=142%
										REACTOME_CYTOSOLIC_TRNA_AMINOACYLATION	21	-0.537366	-1.73801	0.00842697	0.0203517	0.695	7364	tags=76%, list=36%, signal=118%
										REACTOME_POLYMERASE_SWITCHING	13	-0.607063	-1.73545	0.00497512	0.020642	0.701	7033	tags=69%, list=34%, signal=105%
										REACTOME_DUAL_INCISION_REACTION_IN_TC_NER	23	-0.513289	-1.71703	0.00852273	0.0238723	0.766	6773	tags=61%, list=33%, signal=90%
										REACTOME_DUAL_INCISION_REACTION_IN_GG_NER	17	-0.545688	-1.69652	0.00815217	0.0275478	0.815	6773	tags=65%, list=33%, signal=96%
										REACTOME_REGULATION_OF_GLUCOKINASE_BY_GLUCOKINASE_REGULATORY_PROTEIN	27	-0.480139	-1.69097	0.0232558	0.0287648	0.83	6780	tags=74%, list=33%, signal=110%
										REACTOME_PYRIMIDINE_METABOLISM	21	-0.502447	-1.67788	0.017094	0.0309314	0.854	1152	tags=14%, list=6%, signal=15%
										REACTOME_APOPTOSIS	124	-0.350948	-1.67562	0	0.0311564	0.855	4369	tags=32%, list=21%, signal=41%
										REACTOME_JNK_PHOSPHORYLATION_AND_ACTIVATION_MEDIATED_BY_ACTIVATED_HUMAN_TAK1	9	-0.655627	-1.66503	0.045	0.033811	0.874	3193	tags=44%, list=15%, signal=53%
										REACTOME_REPAIR_SYNTHESIS_OF_PATCH_27_30_BASES_LONG_BY_DNA_POLYMERASE	14	-0.565425	-1.6547	0.0336538	0.0359827	0.893	6230	tags=57%, list=30%, signal=82%
										REACTOME_PYRIMIDINE_CATABOLISM	9	-0.650635	-1.65141	0.0220049	0.0365275	0.897	1152	tags=22%, list=6%, signal=24%
										REACTOME_ACTIVATION_OF_CHAPERONES_BY_IRE1_ALPHA	10	-0.627647	-1.64685	0.0258398	0.0374153	0.905	5003	tags=60%, list=24%, signal=79%
										REACTOME_REMOVAL_OF_THE_FLAP_INTERMEDIATE	13	-0.571083	-1.62627	0.0384615	0.0429743	0.936	5546	tags=46%, list=27%, signal=63%
										REACTOME_CONVERSION_FROM_APC_CDC20_TO_APC_CDH1_IN_LATE_ANAPHASE	16	-0.545163	-1.62003	0.0215633	0.0445899	0.95	7059	tags=81%, list=34%, signal=123%
										REACTOME_UNWINDING_OF_DNA	10	-0.609631	-1.60412	0.0280612	0.0491351	0.962	8085	tags=100%, list=39%, signal=164%
										REACTOME_PHASE_1_FUNCTIONALIZATION	14	-0.547675	-1.58864	0.0396825	0.0537835	0.972	433	tags=21%, list=2%, signal=22%
										REACTOME_VIRAL_DSRNA_TLR3_TRIF_COMPLEX_ACTIVATES_RIP1	12	-0.577973	-1.58227	0.0382514	0.0557362	0.977	4635	tags=42%, list=22%, signal=54%
										REACTOME_RNA_POLYMERASE_III_TRANSCRIPTION_INITIATION	26	-0.476279	-1.58009	0.0215633	0.0561609	0.977	4600	tags=42%, list=22%, signal=54%
										REACTOME_TOLL_LIKE_RECEPTOR_3_CASCADE	53	-0.379982	-1.57825	0.0157233	0.0563816	0.98	4635	tags=34%, list=22%, signal=44%
										REACTOME_PEROXISOMAL_LIPID_METABOLISM	19	-0.492912	-1.56898	0.0350404	0.0592664	0.982	5023	tags=58%, list=24%, signal=76%
										REACTOME_INFLUENZA_LIFE_CYCLE	122	-0.327189	-1.5632	0	0.0611628	0.984	7982	tags=56%, list=39%, signal=90%
										REACTOME_E2F_TRANSCRIPTIONAL_TARGETS_AT_G1_S	17	-0.513529	-1.54364	0.048913	0.0688911	0.994	6035	tags=65%, list=29%, signal=91%
										REACTOME_METABOLISM_OF_NITRIC_OXIDE	10	-0.574828	-1.52832	0.0649351	0.0755215	0.996	7031	tags=90%, list=34%, signal=136%
										REACTOME_G1_PHASE	16	-0.491737	-1.51791	0.0580475	0.0796327	0.998	3584	tags=44%, list=17%, signal=53%
										REACTOME_MRNA_PROCESSING	29	-0.417648	-1.50778	0.0369231	0.0841019	0.998	6040	tags=52%, list=29%, signal=73%
										REACTOME_RNA_POLYMERASE_III_TRANSCRIPTION_INITIATION_FROM_TYPE_3_PROMOTER	20	-0.460145	-1.48397	0.0502645	0.095516	0.999	4600	tags=40%, list=22%, signal=51%
										REACTOME_MITOCHONDRIAL_TRNA_AMINOACYLATION	18	-0.473862	-1.47498	0.0580111	0.0989307	0.999	7267	tags=56%, list=35%, signal=86%
										REACTOME_ABORTIVE_ELONGATION_OF_HIV1_TRANSCRIPT_IN_THE_ABSENCE_OF_TAT	20	-0.463252	-1.47554	0.0450704	0.0993808	0.999	6065	tags=50%, list=29%, signal=71%
										REACTOME_GENES_INVOLVED_IN_APOPTOTIC_CLEAVAGE_OF_CELLULAR_PROTEINS	34	-0.391554	-1.46526	0.0508475	0.102171	0.999	2502	tags=26%, list=12%, signal=30%
										REACTOME_CTLA4_INHIBITORY_SIGNALING	20	-0.444572	-1.46544	0.0552326	0.102812	0.999	3854	tags=35%, list=19%, signal=43%
										REACTOME_SYNTHESIS_AND_INTERCONVERSION_OF_NUCLEOTIDE_DI_AND_TRIPHOSPHATES	16	-0.483638	-1.46676	0.0615385	0.102905	0.999	2247	tags=25%, list=11%, signal=28%
										REACTOME_METABLISM_OF_NUCLEOTIDES	67	-0.339209	-1.45474	0.0268456	0.107728	1	4771	tags=33%, list=23%, signal=43%
										REACTOME_PROSTANOID_HORMONES	10	-0.565652	-1.45096	0.0809399	0.108315	1	1097	tags=30%, list=5%, signal=32%
										REACTOME_TAT_MEDIATED_HIV1_ELONGATION_ARREST_AND_RECOVERY	27	-0.417086	-1.45169	0.0733696	0.108729	1	7401	tags=56%, list=36%, signal=86%
										REACTOME_LYSOSOME_VESICLE_BIOGENESIS	21	-0.425527	-1.41645	0.0752089	0.130177	1	3066	tags=24%, list=15%, signal=28%
										REACTOME_APOPTOTIC_EXECUTION_PHASE	45	-0.355338	-1.40738	0.0603175	0.135445	1	2502	tags=27%, list=12%, signal=30%
										REACTOME_FURTHER_PLATELET_RELEASATE	21	-0.424855	-1.40211	0.0652174	0.137885	1	6000	tags=48%, list=29%, signal=67%
										REACTOME_BETACATENIN_PHOSPHORYLATION_CASCADE	12	-0.506483	-1.39208	0.126943	0.143919	1	7238	tags=67%, list=35%, signal=102%
										REACTOME_AKT_PHOSPHORYLATES_TARGETS_IN_THE_CYTOSOL	13	-0.476338	-1.38682	0.111111	0.146745	1	7046	tags=54%, list=34%, signal=82%
										REACTOME_CD28_DEPENDENT_PI3K_AKT_SIGNALING	17	-0.4422	-1.38522	0.0851064	0.146885	1	3854	tags=35%, list=19%, signal=43%
										REACTOME_HUMAN_TAK1_ACTIVATES_NFKB_BY_PHOSPHORYLATION_AND_ACTIVATION_OF_IKKS_COMPLEX	12	-0.485968	-1.38078	0.107417	0.149193	1	4635	tags=33%, list=22%, signal=43%
										REACTOME_MICRORNA_BIOGENESIS	17	-0.439634	-1.37934	0.0989011	0.149371	1	7401	tags=53%, list=36%, signal=82%
										REACTOME_GENERIC_TRANSCRIPTION_PATHWAY	30	-0.379552	-1.37715	0.0823529	0.150094	1	5541	tags=53%, list=27%, signal=73%
										REACTOME_DEATH_RECEPTOR_SIGNALLING	13	-0.481877	-1.36155	0.11828	0.161352	1	2740	tags=31%, list=13%, signal=35%
										REACTOME_GLUCOSE_TRANSPORT	36	-0.353982	-1.35958	0.058642	0.161988	1	6780	tags=61%, list=33%, signal=91%
										REACTOME_PECAM1_INTERACTIONS	12	-0.483764	-1.35011	0.143577	0.168858	1	7135	tags=75%, list=34%, signal=114%
										REACTOME_PURINE_METABOLISM	29	-0.373323	-1.329	0.101604	0.184717	1	4771	tags=41%, list=23%, signal=54%
										REACTOME_PURINE_RIBONUCLEOSIDE_MONOPHOSPHATE_BIOSYNTHESIS	11	-0.479825	-1.32952	0.13388	0.185469	1	4677	tags=45%, list=23%, signal=59%
										REACTOME_COSTIMULATION_BY_THE_CD28_FAMILY	59	-0.31747	-1.32562	0.0923077	0.186322	1	4391	tags=27%, list=21%, signal=34%
										REACTOME_TRAF6_MEDIATED_INDUCTION_OF_THE_ANTIVIRAL_CYTOKINE_IFN_ALPHA_BETA_CASCADE	47	-0.325041	-1.32225	0.0712074	0.188303	1	5725	tags=36%, list=28%, signal=50%
										REACTOME_TRANSFORMATION_OF_LANOSTEROL_TO_CHOLESTEROL	9	-0.524172	-1.31965	0.139423	0.189694	1	4947	tags=56%, list=24%, signal=73%
										REACTOME_MAP_KINASES_ACTIVATION_IN_TLR_CASCADE	38	-0.343193	-1.30911	0.111111	0.198453	1	3327	tags=26%, list=16%, signal=31%
										REACTOME_PHASE_II_CONJUGATION	45	-0.32784	-1.30521	0.0925926	0.200784	1	2484	tags=24%, list=12%, signal=28%
										REACTOME_AMINO_ACID_SYNTHESIS_AND_INTERCONVERSION	12	-0.461132	-1.28909	0.142119	0.216462	1	2474	tags=33%, list=12%, signal=38%
										REACTOME_INNATE_IMMUNITY_SIGNALING	100	-0.274663	-1.28779	0.0811808	0.216539	1	4204	tags=29%, list=20%, signal=36%
										REACTOME_ENERGY_DEPENDENT_REGULATION_OF_MTOR_BY_LKB1_AMPK	17	-0.416688	-1.28097	0.161039	0.222526	1	3439	tags=35%, list=17%, signal=42%
										REACTOME_RNA_POLYMERASE_III_TRANSCRIPTION_TERMINATION	15	-0.415884	-1.25871	0.176781	0.245435	1	2882	tags=20%, list=14%, signal=23%
										REACTOME_REGULATION_OF_PYRUVATE_DEHYDROGENASE_COMPLEX	12	-0.465555	-1.25597	0.190736	0.247234	1	5675	tags=50%, list=27%, signal=69%

## Sheet: twin pair ID 3
Up-regulated Twin Pair ID 3 twinA										Up-regulated Twin Pair ID 3 twinB
Gene Sets Name	Gene Sets Size	Enrichment Score	Normalized Enrichment Score	NOM p-val	FDR q-val	FWER p-val	RANK AT MAX	LEADING EDGE		Gene Sets Name	Gene Sets Size	Enrichment Score	Normalized Enrichment Score	NOM p-val	FDR q-val	FWER p-val	RANK AT MAX	LEADING EDGE
REACTOME_CYCLIN_E_ASSOCIATED_EVENTS_DURING_G1_S_TRANSITION_	57	0.537267	1.98389	0	0.0153014	0.044	6182	tags=51%, list=30%, signal=72%		REACTOME_STRIATED_MUSCLE_CONTRACTION	30	-0.630043	-2.0027	0	0.00931791	0.029	4585	tags=67%, list=22%, signal=86%
REACTOME_G1_S_TRANSITION	96	0.488741	1.9892	0	0.0181596	0.039	6749	tags=51%, list=33%, signal=75%		REACTOME_XENOBIOTICS	12	-0.781632	-2.01651	0	0.0180043	0.028	2426	tags=58%, list=12%, signal=66%
REACTOME_P53_INDEPENDENT_DNA_DAMAGE_RESPONSE	42	0.541016	1.88661	0	0.0205271	0.165	6035	tags=50%, list=29%, signal=70%		REACTOME_ADHERENS_JUNCTIONS_INTERACTIONS	28	-0.596175	-1.91268	0	0.0286506	0.13	5241	tags=61%, list=25%, signal=81%
REACTOME_CLASSICAL_ANTIBODY_MEDIATED_COMPLEMENT_ACTIVATION	9	0.802061	1.87592	0	0.0212013	0.183	730	tags=44%, list=4%, signal=46%		REACTOME_OLFACTORY_SIGNALING_PATHWAY	321	-0.375755	-1.79074	0	0.101202	0.49	2935	tags=32%, list=14%, signal=37%
REACTOME_SCF_SKP2_MEDIATED_DEGRADATION_OF_P27_P21	51	0.525206	1.89062	0	0.0213785	0.16	6182	tags=49%, list=30%, signal=70%		REACTOME_DOPAMINE_NEUROTRANSMITTER_RELEASE_CYCLE	14	-0.636478	-1.71814	0.00417537	0.169852	0.76	4674	tags=57%, list=23%, signal=74%
REACTOME_CDT1_ASSOCIATION_WITH_THE_CDC6_ORC_ORIGIN_COMPLEX	51	0.519756	1.89342	0	0.0221643	0.151	6251	tags=51%, list=30%, signal=73%		REACTOME_SYNTHESIS_OF_BILE_ACIDS_AND_BILE_SALTS_VIA_24_HYDROXYCHOLESTEROL	10	-0.709977	-1.6668	0.0164609	0.191034	0.883	1275	tags=30%, list=6%, signal=32%
REACTOME_AMINO_ACID_SYNTHESIS_AND_INTERCONVERSION	12	0.762596	1.89913	0	0.022506	0.14	3285	tags=58%, list=16%, signal=69%		REACTOME_CYTOCHROME_P450_ARRANGED_BY_SUBSTRATE_TYPE	46	-0.450171	-1.60954	0.010352	0.196891	0.968	2580	tags=33%, list=12%, signal=37%
REACTOME_TELOMERE_MAINTENANCE	65	0.480544	1.81645	0	0.0228833	0.361	7583	tags=58%, list=37%, signal=92%		REACTOME_SYNTHESIS_OF_BILE_ACIDS_AND_BILE_SALTS	18	-0.56608	-1.61386	0.0397614	0.209629	0.966	1275	tags=22%, list=6%, signal=24%
REACTOME_INITIAL_TRIGGERING_OF_COMPLEMENT	15	0.698039	1.82056	0.00205339	0.023597	0.343	730	tags=27%, list=4%, signal=28%		REACTOME_MUSCLE_CONTRACTION	48	-0.467754	-1.6742	0.00581395	0.209672	0.871	4585	tags=48%, list=22%, signal=61%
REACTOME_AUTODEGRADATION_OF_CDH1_BY_CDH1_APC	55	0.498954	1.81654	0	0.0238368	0.361	6221	tags=51%, list=30%, signal=73%		REACTOME_CELL_CELL_ADHESION_SYSTEMS	54	-0.442366	-1.62624	0.00847458	0.211424	0.954	5241	tags=48%, list=25%, signal=64%
REACTOME_EXTENSION_OF_TELOMERES	27	0.574833	1.82153	0	0.0243035	0.338	5858	tags=63%, list=28%, signal=88%		REACTOME_PHASE_1_FUNCTIONALIZATION_OF_COMPOUNDS	64	-0.42812	-1.63828	0.00209205	0.213364	0.937	2580	tags=30%, list=12%, signal=34%
REACTOME_HIV_INFECTION	172	0.412984	1.8091	0	0.024379	0.389	7358	tags=52%, list=36%, signal=80%		REACTOME_GLYCOGEN_BREAKDOWN_GLYCOGENOLYSIS	15	-0.57333	-1.52414	0.0493827	0.24235	0.999	755	tags=20%, list=4%, signal=21%
REACTOME_ORC1_REMOVAL_FROM_CHROMATIN	62	0.503205	1.90274	0	0.0244536	0.135	6251	tags=50%, list=30%, signal=71%
REACTOME_HIV_LIFE_CYCLE	95	0.452196	1.83252	0	0.0246815	0.303	7698	tags=61%, list=37%, signal=97%
REACTOME_VIF_MEDIATED_DEGRADATION_OF_APOBEC3G	45	0.526685	1.82216	0	0.0253936	0.337	6035	tags=47%, list=29%, signal=66%
REACTOME_CDC20_PHOSPHO_APC_MEDIATED_DEGRADATION_OF_CYCLIN_A	59	0.499336	1.83331	0.0019802	0.0258319	0.301	6221	tags=51%, list=30%, signal=72%
REACTOME_S_PHASE	100	0.491489	1.99429	0	0.0258604	0.037	6251	tags=52%, list=30%, signal=74%
REACTOME_RNA_POLYMERASE_I_TRANSCRIPTION_INITIATION	21	0.619575	1.85582	0	0.0262491	0.242	4923	tags=62%, list=24%, signal=81%
REACTOME_CELL_CYCLE_MITOTIC	282	0.385274	1.82446	0	0.0262565	0.332	6515	tags=45%, list=31%, signal=65%
REACTOME_DNA_REPLICATION_PRE_INITIATION	74	0.492663	1.90624	0	0.0263919	0.128	6251	tags=47%, list=30%, signal=68%
REACTOME_GLOBAL_GENOMIC_NER	29	0.580803	1.84056	0	0.0264317	0.276	5858	tags=59%, list=28%, signal=82%
REACTOME_NUCLEOTIDE_EXCISION_REPAIR	43	0.530886	1.8459	0.00190476	0.0267646	0.264	7583	tags=63%, list=37%, signal=99%
REACTOME_COMPLEMENT_CASCADE	22	0.642741	1.93282	0	0.0267649	0.096	1250	tags=27%, list=6%, signal=29%
REACTOME_MITOTIC_M_M_G1_PHASES	146	0.424723	1.83431	0	0.0272739	0.301	6036	tags=42%, list=29%, signal=59%
REACTOME_REGULATION_OF_APC_ACTIVATORS_BETWEEN_G1_S_AND_EARLY_ANAPHASE	67	0.472867	1.79438	0	0.027571	0.437	6603	tags=52%, list=32%, signal=76%
REACTOME_TRANSCRIPTION_COUPLED_NER	38	0.557334	1.91034	0.00197628	0.0284834	0.12	7208	tags=63%, list=35%, signal=97%
REACTOME_M_G1_TRANSITION	60	0.482661	1.78686	0	0.0291865	0.47	6251	tags=47%, list=30%, signal=67%
REACTOME_SYNTHESIS_OF_DNA	86	0.5104	2.03807	0	0.0314578	0.022	6251	tags=52%, list=30%, signal=75%
REACTOME_RNA_POLYMERASE_I_TRANSCRIPTION_TERMINATION	19	0.637865	1.77589	0.00371747	0.0318049	0.5	4923	tags=63%, list=24%, signal=83%
REACTOME_CELL_CYCLE_CHECKPOINTS	101	0.425438	1.75874	0	0.0353014	0.555	6251	tags=46%, list=30%, signal=65%
REACTOME_RNA_POLYMERASE_I_CHAIN_ELONGATION	28	0.555063	1.75941	0.00616016	0.0361183	0.552	5226	tags=57%, list=25%, signal=76%
REACTOME_CYTOSOLIC_TRNA_AMINOACYLATION	21	0.599397	1.7471	0.00608519	0.0383611	0.604	5911	tags=62%, list=29%, signal=87%
REACTOME_SCF_BETA_TRCP_MEDIATED_DEGRADATION_OF_EMI1	47	0.495501	1.74819	0	0.0389671	0.596	6035	tags=47%, list=29%, signal=66%
REACTOME_FORMATION_AND_MATURATION_OF_MRNA_TRANSCRIPT	140	0.402709	1.72608	0	0.0433927	0.691	7490	tags=51%, list=36%, signal=80%
REACTOME_DNA_REPAIR	92	0.437474	1.73168	0	0.0439704	0.666	7709	tags=61%, list=37%, signal=97%
REACTOME_PROCESSING_OF_CAPPED_INTRON_CONTAINING_PRE_MRNA	129	0.409133	1.72251	0	0.044078	0.708	7715	tags=55%, list=37%, signal=87%
REACTOME_RNA_POLYMERASE_I_PROMOTER_CLEARANCE	64	0.455474	1.72807	0.0019685	0.0443627	0.68	7428	tags=56%, list=36%, signal=87%
REACTOME_MRNA_PROCESSING	29	0.546487	1.72632	0.00583658	0.0443764	0.689	7208	tags=59%, list=35%, signal=90%
REACTOME_TRANSCRIPTION	171	0.388999	1.70921	0	0.0487511	0.755	7921	tags=54%, list=38%, signal=87%
REACTOME_ELONGATION_AND_PROCESSING_OF_CAPPED_TRANSCRIPTS	123	0.405329	1.70594	0	0.0494877	0.772	7921	tags=54%, list=38%, signal=88%
REACTOME_LATE_PHASE_OF_HIV_LIFE_CYCLE	82	0.430875	1.6908	0.00389105	0.0560373	0.808	7698	tags=57%, list=37%, signal=91%
REACTOME_TRNA_AMINOACYLATION	36	0.498091	1.67838	0.00775194	0.0597692	0.841	6650	tags=56%, list=32%, signal=82%
REACTOME_IMMUNOREGULATORY_INTERACTIONS_BETWEEN_A_LYMPHOID_AND_A_NON_LYMPHOID_CELL	61	0.444831	1.67962	0.00377358	0.0604847	0.839	3424	tags=25%, list=17%, signal=29%
REACTOME_REPAIR_SYNTHESIS_OF_PATCH_27_30_BASES_LONG_BY_DNA_POLYMERASE	14	0.624608	1.66976	0.019802	0.0632456	0.861	5594	tags=64%, list=27%, signal=88%
REACTOME_FORMATION_OF_THE_EARLY_ELONGATION_COMPLEX	27	0.529853	1.65938	0.00772201	0.0662123	0.883	7698	tags=63%, list=37%, signal=100%
REACTOME_G_BETA_GAMMA_SIGNALLING_THROUGH_PI3KGAMMA	23	0.554841	1.65985	0.0101215	0.0674078	0.881	3563	tags=39%, list=17%, signal=47%
REACTOME_RNA_POLYMERASE_II_TRANSCRIPTION	85	0.422208	1.64528	0	0.0712687	0.916	7921	tags=56%, list=38%, signal=91%
REACTOME_STABILIZATION_OF_P53	44	0.471812	1.64556	0.00587084	0.0725896	0.915	6035	tags=45%, list=29%, signal=64%
REACTOME_HIV1_TRANSCRIPTION_ELONGATION	36	0.481151	1.64702	0.0110497	0.0729398	0.912	7921	tags=58%, list=38%, signal=94%
REACTOME_METABOLISM_OF_RNA	89	0.405717	1.61296	0.00194175	0.0897204	0.958	6543	tags=49%, list=32%, signal=72%
REACTOME_REGULATION_OF_ORNITHINE_DECARBOXYLASE	46	0.456199	1.61367	0.00763359	0.0911608	0.958	6035	tags=43%, list=29%, signal=61%
REACTOME_RNA_POLYMERASE_I_PROMOTER_ESCAPE	18	0.573267	1.60503	0.0296443	0.0936668	0.966	4923	tags=56%, list=24%, signal=73%
REACTOME_RNA_POL_II_CTD_PHOSPHORYLATION_AND_INTERACTION_WITH_CE	23	0.53081	1.58876	0.0196078	0.102992	0.977	7208	tags=57%, list=35%, signal=87%
REACTOME_TRANSCRIPTION_OF_THE_HIV_GENOME	53	0.440937	1.58992	0.0114504	0.103897	0.977	7921	tags=57%, list=38%, signal=91%
REACTOME_ABORTIVE_ELONGATION_OF_HIV1_TRANSCRIPT_IN_THE_ABSENCE_OF_TAT	20	0.536257	1.58156	0.0294118	0.106203	0.983	7698	tags=65%, list=37%, signal=103%
REACTOME_MRNA_SPLICING	100	0.386477	1.58207	0.00558659	0.107708	0.983	7435	tags=50%, list=36%, signal=78%
REACTOME_E2F_TRANSCRIPTIONAL_TARGETS_AT_G1_S	17	0.570875	1.57061	0.0404858	0.11166	0.988	5841	tags=59%, list=28%, signal=82%
REACTOME_DUAL_INCISION_REACTION_IN_TC_NER	23	0.526302	1.56437	0.0402299	0.11329	0.99	7208	tags=57%, list=35%, signal=87%
REACTOME_TRANSPORT_OF_THE_SLBP_INDEPENDENT_MATURE_MRNA	30	0.487128	1.57091	0.0182556	0.1135	0.988	6460	tags=60%, list=31%, signal=87%
REACTOME_LAGGING_STRAND_SYNTHESIS	19	0.536797	1.5651	0.0239521	0.114584	0.99	7922	tags=74%, list=38%, signal=119%
REACTOME_SNRNP_ASSEMBLY	45	0.440126	1.55343	0.0182927	0.121707	0.994	7203	tags=58%, list=35%, signal=88%
REACTOME_UNFOLDED_PROTEIN_RESPONSE	19	0.541366	1.54633	0.0457256	0.12602	0.997	7261	tags=68%, list=35%, signal=105%
REACTOME_CYCLIN_A1_ASSOCIATED_EVENTS_DURING_G2_M_TRANSITION	13	0.597486	1.53998	0.0352941	0.126077	0.998	6453	tags=77%, list=31%, signal=112%
REACTOME_HIV1_TRANSCRIPTION_INITIATION	35	0.464623	1.54097	0.0215686	0.127069	0.998	7208	tags=54%, list=35%, signal=83%
REACTOME_ACTIVATION_OF_CHAPERONES_BY_IRE1_ALPHA	10	0.649325	1.54277	0.0483871	0.127215	0.998	7261	tags=90%, list=35%, signal=139%
REACTOME_EARLY_PHASE_OF_HIV_LIFE_CYCLE	13	0.597521	1.53585	0.059387	0.127577	0.998	4653	tags=69%, list=22%, signal=89%
REACTOME_GENE_EXPRESSION	383	0.315565	1.53027	0	0.128914	0.999	7258	tags=45%, list=35%, signal=68%
REACTOME_CD28_CO_STIMULATION	27	0.486988	1.5312	0.0323887	0.130012	0.999	6367	tags=37%, list=31%, signal=53%
REACTOME_TAT_MEDIATED_HIV1_ELONGATION_ARREST_AND_RECOVERY	27	0.481289	1.51958	0.0426357	0.137557	1	7921	tags=59%, list=38%, signal=96%
REACTOME_MRNA_SPLICING_MINOR_PATHWAY	40	0.444749	1.51493	0.0296443	0.137769	1	7300	tags=58%, list=35%, signal=89%
REACTOME_DNA_STRAND_ELONGATION	29	0.48142	1.51687	0.0346821	0.138181	1	8243	tags=76%, list=40%, signal=126%
REACTOME_INNATE_IMMUNITY_SIGNALING	100	0.370896	1.51166	0.0170778	0.139056	1	2518	tags=18%, list=12%, signal=20%
REACTOME_RNA_POLYMERASE_I_III_AND_MITOCHONDRIAL_TRANSCRIPTION	99	0.376364	1.50935	0.00803213	0.139713	1	7754	tags=52%, list=37%, signal=82%
REACTOME_HOST_INTERACTIONS_OF_HIV_FACTORS	115	0.362378	1.50544	0.004	0.141848	1	7297	tags=47%, list=35%, signal=72%
REACTOME_ACTIVATION_OF_THE_AP1_FAMILY_OF_TRANSCRIPTION_FACTORS	10	0.618909	1.49723	0.0625	0.142918	1	2518	tags=40%, list=12%, signal=46%
REACTOME_VIRAL_DSRNA_TLR3_TRIF_COMPLEX_ACTIVATES_RIP1	12	0.59424	1.50078	0.0515021	0.143227	1	3045	tags=25%, list=15%, signal=29%
REACTOME_DUAL_INCISION_REACTION_IN_GG_NER	17	0.549168	1.49846	0.0480769	0.143607	1	5803	tags=47%, list=28%, signal=65%
REACTOME_COSTIMULATION_BY_THE_CD28_FAMILY	59	0.409065	1.50203	0.0123203	0.143683	1	7450	tags=44%, list=36%, signal=69%
REACTOME_TRANSPORT_OF_MATURE_MRNA_DERIVED_FROM_AN_INTRON_CONTAINING_TRANSCRIPT	48	0.418159	1.49343	0.0214008	0.144852	1	7904	tags=63%, list=38%, signal=101%
REACTOME_G_PROTEIN_BETA_GAMMA_SIGNALLING	26	0.479627	1.48832	0.035514	0.14792	1	4220	tags=42%, list=20%, signal=53%
REACTOME_CITRIC_ACID_CYCLE	17	0.539806	1.48537	0.0568627	0.148745	1	5889	tags=53%, list=28%, signal=74%
REACTOME_ACTIVATION_OF_THE_PRE_REPLICATIVE_COMPLEX	29	0.466779	1.47875	0.0426829	0.152305	1	6251	tags=48%, list=30%, signal=69%
REACTOME_PURINE_METABOLISM	29	0.471997	1.47911	0.026087	0.153815	1	5903	tags=48%, list=29%, signal=67%
REACTOME_TRANSLATION_INITIATION_COMPLEX_FORMATION	50	0.411425	1.46351	0.0350553	0.160661	1	6532	tags=46%, list=32%, signal=67%
REACTOME_PEROXISOMAL_LIPID_METABOLISM	19	0.506794	1.4678	0.0565302	0.161568	1	6723	tags=58%, list=32%, signal=86%
REACTOME_MITOTIC_PROMETAPHASE	83	0.373277	1.46369	0.00976562	0.162304	1	6033	tags=39%, list=29%, signal=54%
REACTOME_METABOLISM_OF_VITAMINS_AND_COFACTORS	40	0.428351	1.46389	0.0198807	0.164006	1	4848	tags=38%, list=23%, signal=49%
REACTOME_E2F_MEDIATED_REGULATION_OF_DNA_REPLICATION	28	0.464076	1.45615	0.0493359	0.165077	1	6749	tags=57%, list=33%, signal=85%
REACTOME_SIGNALING_BY_WNT	56	0.394431	1.45665	0.0409357	0.166397	1	7297	tags=50%, list=35%, signal=77%
REACTOME_TCR_SIGNALING	52	0.395227	1.43841	0.0343511	0.184122	1	3657	tags=23%, list=18%, signal=28%
REACTOME_MEMBRANE_TRAFFICKING	74	0.363745	1.43502	0.0316574	0.186454	1	7266	tags=49%, list=35%, signal=75%
REACTOME_RNA_POLYMERASE_I_PROMOTER_OPENING	44	0.412002	1.41848	0.0503018	0.203946	1	8566	tags=61%, list=41%, signal=104%
REACTOME_TRAFFICKING_OF_GLUR2_CONTAINING_AMPA_RECEPTORS	16	0.517294	1.41584	0.0755814	0.205386	1	3366	tags=38%, list=16%, signal=45%
REACTOME_PURINE_SALVAGE_REACTIONS	11	0.567897	1.40845	0.107345	0.212713	1	4150	tags=45%, list=20%, signal=57%
REACTOME_ELECTRON_TRANSPORT_CHAIN	57	0.378762	1.40286	0.040568	0.215322	1	7678	tags=58%, list=37%, signal=92%
REACTOME_ADP_SIGNALLING_THROUGH_P2Y_PURINOCEPTOR_12	19	0.492563	1.40377	0.104418	0.216653	1	3563	tags=37%, list=17%, signal=44%
REACTOME_REGULATION_OF_GLUCOKINASE_BY_GLUCOKINASE_REGULATORY_PROTEIN	27	0.442305	1.3975	0.0731225	0.219982	1	6460	tags=52%, list=31%, signal=75%
REACTOME_BRANCHED_CHAIN_AMINO_ACID_CATABOLISM	16	0.521162	1.39367	0.106061	0.222946	1	5551	tags=56%, list=27%, signal=77%
REACTOME_G2_M_CHECKPOINTS	37	0.413097	1.38927	0.0516899	0.226455	1	6721	tags=51%, list=32%, signal=76%
REACTOME_REMOVAL_OF_DNA_PATCH_CONTAINING_ABASIC_RESIDUE	14	0.526584	1.38411	0.110187	0.226982	1	5176	tags=50%, list=25%, signal=67%
REACTOME_PHOSPHORYLATION_OF_CD3_AND_TCR_ZETA_CHAINS	18	0.484705	1.38627	0.0914634	0.228626	1	7450	tags=61%, list=36%, signal=95%
REACTOME_PACKAGING_OF_TELOMERE_ENDS	38	0.412477	1.38445	0.0700389	0.228812	1	7428	tags=47%, list=36%, signal=74%
REACTOME_ASSOCIATION_OF_LICENSING_FACTORS_WITH_THE_PREREPLICATIVE_COMPLEX	12	0.546659	1.37427	0.108333	0.235861	1	6698	tags=67%, list=32%, signal=99%
REACTOME_NUCLEAR_IMPORT_OF_REV_PROTEIN	28	0.433575	1.37595	0.0759754	0.235905	1	6460	tags=57%, list=31%, signal=83%
REACTOME_REV_MEDIATED_NUCLEAR_EXPORT_OF_HIV1_RNA	29	0.426359	1.36846	0.0831758	0.241341	1	6530	tags=55%, list=32%, signal=80%
REACTOME_NEP_NS2_INTERACTS_WITH_THE_CELLULAR_EXPORT_MACHINERY	27	0.438885	1.36151	0.0964567	0.246127	1	6460	tags=56%, list=31%, signal=81%
REACTOME_METABOLISM_OF_MRNA	44	0.385728	1.36174	0.0684932	0.248111	1	6543	tags=48%, list=32%, signal=70%

## Sheet: twin pair ID 4
Up-regulated in Twin Pair ID 4 twinA										Up-regulated in Twin Pair ID 4 twinB
Gene Sets Name	Gene Sets Size	Enrichment Score	Normalized Enrichment Score	NOM p-val	FDR q-val	FWER p-val	RANK AT MAX	LEADING EDGE		Gene Sets Name	Gene Sets Size	Enrichment Score	Normalized Enrichment Score	NOM p-val	FDR q-val	FWER p-val	RANK AT MAX	LEADING EDGE
n/a										REACTOME_RECYCLING_OF_BILE_ACIDS_AND_SALTS	10	-0.740156	-1.78358	0.0144578	0.249283	0.508	291	tags=30%, list=1%, signal=30%

## Sheet: twin pair ID 5
Up-regulated in Twin Pair ID 5 twinA										Up-regulated in Twin Pair ID 5 twinB
Gene Sets Name	Gene Sets Size	Enrichment Score	Normalized Enrichment Score	NOM p-val	FDR q-val	FWER p-val	RANK AT MAX	LEADING EDGE		Gene Sets Name	Gene Sets Size	Enrichment Score	Normalized Enrichment Score	NOM p-val	FDR q-val	FWER p-val	RANK AT MAX	LEADING EDGE
n/a										REACTOME_UNFOLDED_PROTEIN_RESPONSE	19	-0.625897	-1.85219	0	0.227141	0.259	5858	tags=68%, list=28%, signal=95%

## Sheet: twin pair ID 6
Up-regulated in Twin Pair ID 6 twinA										Up-regulated in Twin Pair ID 6 twinB
Gene Sets Name	Gene Sets Size	Enrichment Score	Normalized Enrichment Score	NOM p-val	FDR q-val	FWER p-val	RANK AT MAX	LEADING EDGE		Gene Sets Name	Gene Sets Size	Enrichment Score	Normalized Enrichment Score	NOM p-val	FDR q-val	FWER p-val	RANK AT MAX	LEADING EDGE
REACTOME_REGULATION_OF_GENE_EXPRESSION_IN_BETA_CELLS	90	0.424616	1.72266	0	0.139002	0.731	8449	tags=63%, list=41%, signal=107%		REACTOME_S_PHASE	100	-0.597229	-2.42343	0	0	0	6223	tags=66%, list=30%, signal=94%
REACTOME_HORMONE_LIGAND_BINDING_RECEPTORS	8	0.754456	1.73238	0.00377358	0.153781	0.693	4531	tags=75%, list=22%, signal=96%		REACTOME_MITOTIC_M_M_G1_PHASES	146	-0.560126	-2.38724	0	0	0	6223	tags=67%, list=30%, signal=95%
REACTOME_CALCITONIN_LIKE_LIGAND_RECEPTORS	10	0.702804	1.69378	0.00189394	0.155019	0.821	5020	tags=60%, list=24%, signal=79%		REACTOME_CELL_CYCLE_CHECKPOINTS	101	-0.589027	-2.38632	0	0	0	6223	tags=65%, list=30%, signal=93%
REACTOME_AMINE_LIGAND_BINDING_RECEPTORS	42	0.50522	1.74131	0	0.189578	0.666	6534	tags=69%, list=32%, signal=101%		REACTOME_CELL_CYCLE_MITOTIC	282	-0.506979	-2.37048	0	0	0	6223	tags=61%, list=30%, signal=86%
REACTOME_NCAM1_INTERACTIONS	44	0.460865	1.62433	0.0123457	0.194064	0.959	4545	tags=43%, list=22%, signal=55%		REACTOME_SYNTHESIS_OF_DNA	86	-0.596397	-2.34258	0	0	0	6223	tags=69%, list=30%, signal=98%
REACTOME_PEPTIDE_CHAIN_ELONGATION	74	0.425894	1.64796	0.0019802	0.203147	0.929	8449	tags=66%, list=41%, signal=112%		REACTOME_G1_S_TRANSITION	96	-0.577569	-2.3354	0	0	0	6223	tags=68%, list=30%, signal=96%
REACTOME_STEROID_HORMONE_BIOSYNTHESIS	13	0.605297	1.62523	0.0285171	0.216836	0.959	6955	tags=77%, list=34%, signal=116%		REACTOME_DNA_REPLICATION_PRE_INITIATION	74	-0.598129	-2.2873	0	0	0	6223	tags=69%, list=30%, signal=98%
REACTOME_VIRAL_MRNA_TRANSLATION	74	0.47258	1.83178	0	0.216978	0.33	9115	tags=76%, list=44%, signal=135%		REACTOME_G2_M_CHECKPOINTS	37	-0.679853	-2.24716	0	0	0	5764	tags=84%, list=28%, signal=116%
										REACTOME_RNA_POLYMERASE_I_PROMOTER_CLEARANCE	64	-0.601254	-2.23317	0	0	0	5640	tags=63%, list=27%, signal=86%
										REACTOME_TELOMERE_MAINTENANCE	65	-0.594136	-2.21881	0	0.000110092	0.001	6262	tags=68%, list=30%, signal=97%
										REACTOME_RNA_POLYMERASE_I_PROMOTER_OPENING	44	-0.647248	-2.22101	0	0.000119266	0.001	5640	tags=70%, list=27%, signal=97%
										REACTOME_ACTIVATION_OF_ATR_IN_RESPONSE_TO_REPLICATION_STRESS	33	-0.690526	-2.22201	0	0.000130108	0.001	5214	tags=82%, list=25%, signal=109%
										REACTOME_COMPLEMENT_CASCADE	22	-0.755457	-2.22411	0	0.000143119	0.001	40	tags=14%, list=0%, signal=14%
										REACTOME_MITOTIC_PROMETAPHASE	83	-0.560831	-2.17466	0	0.000522988	0.005	4498	tags=55%, list=22%, signal=71%
										REACTOME_RNA_POLYMERASE_I_III_AND_MITOCHONDRIAL_TRANSCRIPTION	99	-0.521038	-2.11587	0	0.000778669	0.009	5707	tags=58%, list=28%, signal=79%
										REACTOME_CYCLIN_E_ASSOCIATED_EVENTS_DURING_G1_S_TRANSITION_	57	-0.583196	-2.13861	0	0.000785748	0.008	7802	tags=79%, list=38%, signal=126%
										REACTOME_M_G1_TRANSITION	60	-0.583571	-2.11854	0	0.000827336	0.009	6805	tags=70%, list=33%, signal=104%
										REACTOME_INITIAL_TRIGGERING_OF_COMPLEMENT	15	-0.806399	-2.1129	0	0.000855002	0.011	40	tags=20%, list=0%, signal=20%
										REACTOME_TRANSCRIPTION	171	-0.485993	-2.11343	0	0.000902502	0.011	6502	tags=60%, list=31%, signal=86%
										REACTOME_SIGNALING_BY_WNT	56	-0.571799	-2.09505	0	0.00097504	0.014	8078	tags=80%, list=39%, signal=131%
										REACTOME_ORC1_REMOVAL_FROM_CHROMATIN	62	-0.574625	-2.09581	0	0.00102379	0.014	6805	tags=69%, list=33%, signal=103%
										REACTOME_DNA_STRAND_ELONGATION	29	-0.663797	-2.08983	0	0.00105514	0.016	4747	tags=72%, list=23%, signal=94%
										REACTOME_SCF_SKP2_MEDIATED_DEGRADATION_OF_P27_P21	51	-0.589501	-2.07189	0	0.00159257	0.025	7802	tags=82%, list=38%, signal=132%
										REACTOME_CLASSICAL_ANTIBODY_MEDIATED_COMPLEMENT_ACTIVATION	9	-0.894208	-2.05941	0	0.00176863	0.029	40	tags=33%, list=0%, signal=33%
										REACTOME_APOPTOTIC_CLEAVAGE_OF_CELL_ADHESION_PROTEINS	10	-0.849163	-2.05405	0	0.00181373	0.031	493	tags=40%, list=2%, signal=41%
										REACTOME_IMMUNOREGULATORY_INTERACTIONS_BETWEEN_A_LYMPHOID_AND_A_NON_LYMPHOID_CELL	61	-0.556066	-2.05041	0	0.00196777	0.035	1553	tags=18%, list=8%, signal=19%
										REACTOME_REGULATION_OF_APC_ACTIVATORS_BETWEEN_G1_S_AND_EARLY_ANAPHASE	67	-0.540927	-2.04483	0	0.0019798	0.038	7802	tags=76%, list=38%, signal=122%
										REACTOME_DNA_REPAIR	92	-0.518605	-2.04614	0	0.00205313	0.038	5678	tags=54%, list=27%, signal=75%
										REACTOME_P53_INDEPENDENT_DNA_DAMAGE_RESPONSE	42	-0.578542	-2.02381	0	0.00233089	0.047	7802	tags=79%, list=38%, signal=126%
										REACTOME_ACTIVATION_OF_THE_PRE_REPLICATIVE_COMPLEX	29	-0.644999	-2.02429	0.00204499	0.00241126	0.047	4934	tags=72%, list=24%, signal=95%
										REACTOME_PACKAGING_OF_TELOMERE_ENDS	38	-0.610758	-2.01776	0	0.00254493	0.054	5640	tags=61%, list=27%, signal=83%
										REACTOME_CDT1_ASSOCIATION_WITH_THE_CDC6_ORC_ORIGIN_COMPLEX	51	-0.565863	-2.01833	0	0.00262703	0.054	7802	tags=78%, list=38%, signal=126%
										REACTOME_REGULATION_OF_ORNITHINE_DECARBOXYLASE	46	-0.578348	-2.00825	0	0.00308842	0.068	7810	tags=78%, list=38%, signal=125%
										REACTOME_APOPTOSIS	124	-0.491366	-2.0016	0	0.00325387	0.074	5326	tags=48%, list=26%, signal=65%
										REACTOME_PROCESSING_OF_CAPPED_INTRON_CONTAINING_PRE_MRNA	129	-0.466469	-1.96375	0	0.00585897	0.133	6855	tags=55%, list=33%, signal=82%
										REACTOME_SCF_BETA_TRCP_MEDIATED_DEGRADATION_OF_EMI1	47	-0.569683	-1.96175	0	0.00593393	0.137	7802	tags=79%, list=38%, signal=126%
										REACTOME_HIV_INFECTION	172	-0.447132	-1.9423	0	0.006637	0.159	6855	tags=54%, list=33%, signal=80%
										REACTOME_CDC20_PHOSPHO_APC_MEDIATED_DEGRADATION_OF_CYCLIN_A	59	-0.534152	-1.94386	0.00198413	0.00678003	0.159	7802	tags=75%, list=38%, signal=119%
										REACTOME_HIV_LIFE_CYCLE	95	-0.486778	-1.92425	0	0.00859078	0.207	6579	tags=54%, list=32%, signal=78%
										REACTOME_SNRNP_ASSEMBLY	45	-0.556118	-1.91771	0	0.00887986	0.224	7839	tags=80%, list=38%, signal=129%
										REACTOME_APOPTOTIC_EXECUTION_PHASE	45	-0.552991	-1.91803	0	0.00906541	0.223	2625	tags=36%, list=13%, signal=41%
										REACTOME_STABILIZATION_OF_P53	44	-0.557258	-1.90205	0.00194553	0.0106094	0.261	7802	tags=75%, list=38%, signal=120%
										REACTOME_FANCONI_ANEMIA_PATHWAY	14	-0.733462	-1.89519	0.00416667	0.0112215	0.286	4115	tags=64%, list=20%, signal=80%
										REACTOME_EARLY_PHASE_OF_HIV_LIFE_CYCLE	13	-0.736286	-1.89539	0	0.0114825	0.286	907	tags=15%, list=4%, signal=16%
										REACTOME_LATE_PHASE_OF_HIV_LIFE_CYCLE	82	-0.473122	-1.87515	0	0.013886	0.342	6579	tags=59%, list=32%, signal=85%
										REACTOME_REV_MEDIATED_NUCLEAR_EXPORT_OF_HIV1_RNA	29	-0.586336	-1.86573	0.00204918	0.0149148	0.366	8049	tags=86%, list=39%, signal=141%
										REACTOME_VIF_MEDIATED_DEGRADATION_OF_APOBEC3G	45	-0.545278	-1.86299	0	0.0151329	0.378	7802	tags=76%, list=38%, signal=121%
										REACTOME_GENES_INVOLVED_IN_APOPTOTIC_CLEAVAGE_OF_CELLULAR_PROTEINS	34	-0.572332	-1.84228	0	0.0184501	0.445	2625	tags=38%, list=13%, signal=44%
										REACTOME_MRNA_SPLICING	100	-0.459953	-1.83774	0	0.0189639	0.457	6854	tags=54%, list=33%, signal=80%
										REACTOME_FORMATION_AND_MATURATION_OF_MRNA_TRANSCRIPT	140	-0.428782	-1.83526	0	0.0192138	0.466	6556	tags=51%, list=32%, signal=75%
										REACTOME_TRANSPORT_OF_THE_SLBP_INDEPENDENT_MATURE_MRNA	30	-0.572457	-1.81879	0.00625	0.0215914	0.523	8049	tags=80%, list=39%, signal=131%
										REACTOME_NUCLEAR_IMPORT_OF_REV_PROTEIN	28	-0.586129	-1.82037	0.00206612	0.0216928	0.519	8049	tags=86%, list=39%, signal=140%
										REACTOME_CYCLIN_A1_ASSOCIATED_EVENTS_DURING_G2_M_TRANSITION	13	-0.727411	-1.82112	0.00828157	0.0217853	0.515	4748	tags=69%, list=23%, signal=90%
										REACTOME_AUTODEGRADATION_OF_CDH1_BY_CDH1_APC	55	-0.505401	-1.81509	0	0.0220511	0.538	7802	tags=71%, list=38%, signal=114%
										REACTOME_INNATE_IMMUNITY_SIGNALING	100	-0.453414	-1.81101	0	0.0221927	0.551	3895	tags=26%, list=19%, signal=32%
										REACTOME_EXTENSION_OF_TELOMERES	27	-0.580138	-1.81115	0.00591716	0.0225695	0.55	6458	tags=74%, list=31%, signal=108%
										REACTOME_UNWINDING_OF_DNA	10	-0.762404	-1.79529	0.00581395	0.0252574	0.611	4676	tags=90%, list=23%, signal=116%
										REACTOME_CHEMOKINE_RECEPTORS_BIND_CHEMOKINES	49	-0.509122	-1.79604	0.00196078	0.025575	0.609	909	tags=18%, list=4%, signal=19%
										REACTOME_TRANSPORT_OF_MATURE_MRNA_DERIVED_FROM_AN_INTRON_CONTAINING_TRANSCRIPT	48	-0.512897	-1.78644	0	0.0269972	0.646	4918	tags=46%, list=24%, signal=60%
										REACTOME_MRNA_SPLICING_MINOR_PATHWAY	40	-0.528791	-1.77976	0.00612245	0.0280443	0.676	5892	tags=58%, list=28%, signal=80%
										REACTOME_NEP_NS2_INTERACTS_WITH_THE_CELLULAR_EXPORT_MACHINERY	27	-0.585414	-1.76723	0.0157171	0.0307244	0.711	8049	tags=89%, list=39%, signal=145%
										REACTOME_HOST_INTERACTIONS_OF_HIV_FACTORS	115	-0.426238	-1.76112	0.00198413	0.0319461	0.73	7915	tags=67%, list=38%, signal=108%
										REACTOME_ELONGATION_AND_PROCESSING_OF_CAPPED_TRANSCRIPTS	123	-0.420699	-1.75835	0	0.032439	0.742	6357	tags=50%, list=31%, signal=71%
										REACTOME_TRANSCRIPTION_COUPLED_NER	38	-0.52543	-1.75209	0	0.0338524	0.769	5880	tags=63%, list=28%, signal=88%
										REACTOME_LAGGING_STRAND_SYNTHESIS	19	-0.637084	-1.74997	0.012685	0.0339777	0.777	5967	tags=79%, list=29%, signal=111%
										REACTOME_E2F_MEDIATED_REGULATION_OF_DNA_REPLICATION	28	-0.572574	-1.73445	0.00196464	0.0385427	0.827	6059	tags=79%, list=29%, signal=111%
										REACTOME_DOUBLE_STRAND_BREAK_REPAIR	20	-0.592694	-1.72277	0.0104167	0.0416991	0.852	4486	tags=50%, list=22%, signal=64%
										REACTOME_INTRINSIC_PATHWAY_FOR_APOPTOSIS	28	-0.551583	-1.71301	0.0125523	0.0446253	0.876	2864	tags=39%, list=14%, signal=46%
										REACTOME_NUCLEOTIDE_EXCISION_REPAIR	43	-0.49795	-1.70939	0.008	0.0450123	0.882	5880	tags=60%, list=28%, signal=84%
										REACTOME_OPIOID_SIGNALLING	77	-0.443549	-1.70084	0.00775194	0.0481097	0.915	5951	tags=47%, list=29%, signal=65%
										REACTOME_JNK_PHOSPHORYLATION_AND_ACTIVATION_MEDIATED_BY_ACTIVATED_HUMAN_TAK1	9	-0.7364	-1.69063	0.0261569	0.051775	0.93	4149	tags=67%, list=20%, signal=83%
										REACTOME_REMOVAL_OF_THE_FLAP_INTERMEDIATE	13	-0.652339	-1.68667	0.0163934	0.0521454	0.936	5967	tags=85%, list=29%, signal=119%
										REACTOME_RNA_POLYMERASE_I_CHAIN_ELONGATION	28	-0.539292	-1.68749	0.0117188	0.0524208	0.936	5880	tags=57%, list=28%, signal=80%
										REACTOME_SIGNALING_IN_IMMUNE_SYSTEM	297	-0.362498	-1.68385	0	0.052432	0.942	3295	tags=23%, list=16%, signal=26%
										REACTOME_RNA_POLYMERASE_II_TRANSCRIPTION	85	-0.428319	-1.67643	0.00585938	0.055053	0.953	6319	tags=53%, list=31%, signal=76%
										REACTOME_E2F_TRANSCRIPTIONAL_TARGETS_AT_G1_S	17	-0.603485	-1.67393	0.0159046	0.0553615	0.954	4456	tags=71%, list=22%, signal=90%
										REACTOME_REPAIR_SYNTHESIS_OF_PATCH_27_30_BASES_LONG_BY_DNA_POLYMERASE	14	-0.64512	-1.66697	0.024	0.0577291	0.961	5678	tags=79%, list=27%, signal=108%
										REACTOME_G1_PHASE	16	-0.617551	-1.65498	0.0151188	0.0626077	0.973	6020	tags=56%, list=29%, signal=79%
										REACTOME_ELECTRON_TRANSPORT_CHAIN	57	-0.456953	-1.65212	0.00556586	0.0632051	0.974	5998	tags=53%, list=29%, signal=74%
										REACTOME_CAM_PATHWAY	24	-0.54825	-1.6377	0.0230608	0.0664693	0.977	5951	tags=58%, list=29%, signal=82%
										REACTOME_POLYMERASE_SWITCHING	13	-0.640327	-1.63803	0.0388548	0.0672296	0.977	5967	tags=85%, list=29%, signal=119%
										REACTOME_SIGNAL_ATTENUATION	10	-0.682837	-1.63816	0.0319829	0.0679492	0.976	2392	tags=40%, list=12%, signal=45%
										REACTOME_PYRUVATE_METABOLISM_AND_TCA_CYCLE	34	-0.500051	-1.6387	0.0134875	0.0686196	0.976	5414	tags=44%, list=26%, signal=60%
										REACTOME_GLUCURONIDATION	8	-0.704759	-1.63207	0.0388548	0.0686282	0.978	1591	tags=38%, list=8%, signal=41%
										REACTOME_METABOLISM_OF_RNA	89	-0.411681	-1.62917	0.003663	0.0691415	0.979	7850	tags=64%, list=38%, signal=103%
										REACTOME_SHC_RELATED_EVENTS	10	-0.708121	-1.62558	0.0234542	0.0700875	0.981	2392	tags=40%, list=12%, signal=45%
										REACTOME_TRANSPORT_OF_RIBONUCLEOPROTEINS_INTO_THE_HOST_NUCLEUS	27	-0.533381	-1.6235	0.0308285	0.0703944	0.982	8049	tags=85%, list=39%, signal=139%
										REACTOME_ASSOCIATION_OF_LICENSING_FACTORS_WITH_THE_PREREPLICATIVE_COMPLEX	12	-0.645009	-1.61618	0.0313725	0.0734709	0.986	6059	tags=75%, list=29%, signal=106%
										REACTOME_GLOBAL_GENOMIC_NER	29	-0.50712	-1.61249	0.0179283	0.0746151	0.988	5880	tags=55%, list=28%, signal=77%
										REACTOME_VPR_MEDIATED_NUCLEAR_IMPORT_OF_PICS	29	-0.511128	-1.61014	0.0175781	0.0752009	0.988	8049	tags=76%, list=39%, signal=124%
										REACTOME_ADP_SIGNALLING_THROUGH_P2Y_PURINOCEPTOR_1	23	-0.545678	-1.60839	0.0162602	0.0753656	0.988	1672	tags=26%, list=8%, signal=28%
										REACTOME_REMOVAL_OF_DNA_PATCH_CONTAINING_ABASIC_RESIDUE	14	-0.613498	-1.60336	0.0357895	0.0776472	0.992	5678	tags=57%, list=27%, signal=79%
										REACTOME_REGULATION_OF_GLUCOKINASE_BY_GLUCOKINASE_REGULATORY_PROTEIN	27	-0.521798	-1.59953	0.0281996	0.0790822	0.993	8049	tags=81%, list=39%, signal=133%
										REACTOME_SYNTHESIS_OF_BILE_ACIDS_AND_BILE_SALTS_VIA_24_HYDROXYCHOLESTEROL	10	-0.671612	-1.59545	0.0439122	0.0804543	0.995	2169	tags=50%, list=10%, signal=56%
										REACTOME_DARPP32_EVENTS	24	-0.53898	-1.58717	0.0327198	0.084294	0.995	6887	tags=71%, list=33%, signal=106%
										REACTOME_BASE_FREE_SUGAR_PHOSPHATE_REMOVAL_VIA_THE_SINGLE_NUCLEOTIDE_REPLACEMENT_PATHWAY	9	-0.675611	-1.58527	0.0538302	0.0843774	0.995	4991	tags=44%, list=24%, signal=59%
										REACTOME_PLATELET_ACTIVATION	157	-0.366312	-1.58198	0.00193424	0.0857182	0.995	2204	tags=20%, list=11%, signal=22%
										REACTOME_TRANSCRIPTION_OF_THE_HIV_GENOME	53	-0.439031	-1.57103	0.0124224	0.0910642	0.995	6502	tags=58%, list=31%, signal=85%
										REACTOME_SOS_MEDIATED_SIGNALLING	10	-0.652707	-1.55612	0.057377	0.0990865	0.998	2392	tags=40%, list=12%, signal=45%
										REACTOME_CDC6_ASSOCIATION_WITH_THE_ORC:ORIGIN_COMPLEX	11	-0.638217	-1.55646	0.05	0.0998241	0.998	6059	tags=82%, list=29%, signal=116%
										REACTOME_PLATELET_ACTIVATION_TRIGGERS	55	-0.429608	-1.55213	0.014	0.1006	0.998	1787	tags=22%, list=9%, signal=24%
										REACTOME_HOMOLOGOUS_RECOMBINATION_REPAIR	14	-0.589325	-1.54998	0.0390144	0.10105	0.998	4486	tags=57%, list=22%, signal=73%
										REACTOME_GRB2_EVENTS_IN_EGFR_SIGNALING	10	-0.652149	-1.54521	0.0412148	0.103036	0.998	2392	tags=30%, list=12%, signal=34%
										REACTOME_G2_M_TRANSITION	75	-0.394569	-1.53151	0.00767754	0.110656	0.999	6087	tags=49%, list=29%, signal=70%
										REACTOME_CITRIC_ACID_CYCLE	17	-0.560014	-1.53179	0.0426829	0.111593	0.999	5414	tags=47%, list=26%, signal=64%
										REACTOME_RNA_POLYMERASE_III_TRANSCRIPTION_INITIATION	26	-0.50382	-1.52064	0.0428266	0.117379	1	6492	tags=65%, list=31%, signal=95%
										REACTOME_PLC_GAMMA1_SIGNALLING	33	-0.473655	-1.51752	0.0376238	0.118335	1	5951	tags=52%, list=29%, signal=72%
										REACTOME_THROMBIN_SIGNALLING_THROUGH_PROTEINASE_ACTIVATED_RECEPTORS	25	-0.487533	-1.51286	0.0556745	0.119651	1	863	tags=20%, list=4%, signal=21%
										REACTOME_PLATELET_DEGRANULATION	81	-0.393628	-1.51075	0.0198413	0.120306	1	2204	tags=20%, list=11%, signal=22%
										REACTOME_REGULATION_OF_PYRUVATE_DEHYDROGENASE_COMPLEX	12	-0.593423	-1.51338	0.0737052	0.120377	1	5151	tags=58%, list=25%, signal=78%
										REACTOME_ENDOGENOUS_STEROLS	14	-0.5718	-1.50661	0.065678	0.122326	1	2169	tags=36%, list=10%, signal=40%
										REACTOME_E2F_ENABLED_INHIBITION_OF_PRE_REPLICATION_COMPLEX_FORMATION	9	-0.63529	-1.49033	0.0748441	0.132041	1	6059	tags=78%, list=29%, signal=110%
										REACTOME_PLC_BETA_MEDIATED_EVENTS	36	-0.455889	-1.49091	0.0426357	0.132808	1	5951	tags=50%, list=29%, signal=70%
										REACTOME_ABORTIVE_ELONGATION_OF_HIV1_TRANSCRIPT_IN_THE_ABSENCE_OF_TAT	20	-0.508271	-1.48511	0.0526316	0.13367	1	6854	tags=75%, list=33%, signal=112%
										REACTOME_SIGNAL_AMPLIFICATION	29	-0.479542	-1.48227	0.041841	0.133805	1	1672	tags=21%, list=8%, signal=22%
										REACTOME_REMOVAL_OF_THE_FLAP_INTERMEDIATE_FROM_THE_C_STRAND	9	-0.633921	-1.48566	0.0859375	0.134407	1	5678	tags=78%, list=27%, signal=107%
										REACTOME_SHC_MEDIATED_SIGNALLING	9	-0.636273	-1.48237	0.0817996	0.134871	1	2392	tags=33%, list=12%, signal=38%
										REACTOME_FORMATION_OF_PLATELET_PLUG	175	-0.340102	-1.47829	0.00948767	0.136027	1	2657	tags=21%, list=13%, signal=24%
										REACTOME_BASE_EXCISION_REPAIR	17	-0.538869	-1.47261	0.0748441	0.139973	1	7965	tags=71%, list=38%, signal=115%
										REACTOME_MRNA_3_END_PROCESSING	33	-0.449607	-1.47083	0.0587045	0.140173	1	6080	tags=48%, list=29%, signal=69%
										REACTOME_ASSOCIATION_OF_TRIC_CCT_WITH_TARGET_PROTEINS_DURING_BIOSYNTHESIS	27	-0.465576	-1.45794	0.0610998	0.149228	1	7138	tags=44%, list=34%, signal=68%
										REACTOME_ACTIVATION_OF_BH3_ONLY_PROTEINS	15	-0.555125	-1.45857	0.0772358	0.149945	1	2864	tags=40%, list=14%, signal=46%
										REACTOME_HIV1_TRANSCRIPTION_INITIATION	35	-0.444208	-1.44752	0.064257	0.153304	1	6502	tags=57%, list=31%, signal=83%
										REACTOME_RESOLUTION_OF_AP_SITES_VIA_THE_SINGLE_NUCLEOTIDE_REPLACEMENT_PATHWAY	11	-0.587492	-1.44834	0.0947581	0.15374	1	7965	tags=64%, list=38%, signal=103%
										REACTOME_GLUCOSE_TRANSPORT	36	-0.43632	-1.45059	0.0479042	0.154098	1	8049	tags=72%, list=39%, signal=118%
										REACTOME_GOLGI_ASSOCIATED_VESICLE_BIOGENESIS	51	-0.413322	-1.44517	0.0497925	0.154346	1	4008	tags=25%, list=19%, signal=32%
										REACTOME_BETACATENIN_PHOSPHORYLATION_CASCADE	12	-0.602469	-1.44838	0.0672451	0.154969	1	8078	tags=83%, list=39%, signal=137%
										REACTOME_SYNTHESIS_AND_INTERCONVERSION_OF_NUCLEOTIDE_DI_AND_TRIPHOSPHATES	16	-0.522482	-1.43889	0.0703297	0.15876	1	5962	tags=69%, list=29%, signal=97%
										REACTOME_SPHINGOLIPID_METABOLISM	30	-0.450582	-1.42942	0.0616016	0.164606	1	1470	tags=20%, list=7%, signal=21%
										REACTOME_ETHANOL_OXIDATION	10	-0.611047	-1.42986	0.115942	0.165535	1	1053	tags=30%, list=5%, signal=32%
										REACTOME_RNA_POLYMERASE_I_TRANSCRIPTION_INITIATION	21	-0.486234	-1.42587	0.0794297	0.165782	1	4414	tags=43%, list=21%, signal=54%
										REACTOME_FURTHER_PLATELET_RELEASATE	21	-0.502333	-1.42652	0.0767677	0.166321	1	6156	tags=57%, list=30%, signal=81%
										REACTOME_MAP_KINASES_ACTIVATION_IN_TLR_CASCADE	38	-0.421822	-1.42043	0.0813954	0.168965	1	5632	tags=47%, list=27%, signal=65%
										REACTOME_TCR_SIGNALING	52	-0.392152	-1.41419	0.0429688	0.173284	1	2068	tags=17%, list=10%, signal=19%
										REACTOME_THROMBOXANE_SIGNALLING_THROUGH_TP_RECEPTOR	21	-0.479122	-1.41222	0.0686275	0.174053	1	726	tags=19%, list=4%, signal=20%
										REACTOME_RNA_POLYMERASE_III_TRANSCRIPTION_INITIATION_FROM_TYPE_3_PROMOTER	20	-0.48093	-1.40738	0.0929752	0.174314	1	6378	tags=60%, list=31%, signal=87%
										REACTOME_SIGNALING_BY_ROBO_RECEPTOR	31	-0.442577	-1.40979	0.079918	0.175023	1	3240	tags=32%, list=16%, signal=38%
										REACTOME_APOPTOSIS_INDUCED_DNA_FRAGMENTATION	11	-0.580002	-1.40758	0.0901804	0.175424	1	2335	tags=36%, list=11%, signal=41%
										REACTOME_G_PROTEIN_ACTIVATION	25	-0.465045	-1.40388	0.0785124	0.176227	1	1600	tags=20%, list=8%, signal=22%
										REACTOME_LOSS_OF_NLP_FROM_MITOTIC_CENTROSOMES	56	-0.384187	-1.40033	0.061144	0.178036	1	2948	tags=29%, list=14%, signal=33%
										REACTOME_MAPK_TARGETS_NUCLEAR_EVENTS_MEDIATED_BY_MAP_KINASES	28	-0.45767	-1.3967	0.10241	0.178767	1	6887	tags=61%, list=33%, signal=91%
										REACTOME_CYTOSOLIC_TRNA_AMINOACYLATION	21	-0.479254	-1.39438	0.0961924	0.179612	1	7391	tags=67%, list=36%, signal=104%
										REACTOME_CLATHRIN_DERIVED_VESICLE_BUDDING	58	-0.387355	-1.3972	0.0623782	0.179653	1	4008	tags=24%, list=19%, signal=30%
										REACTOME_RNA_POLYMERASE_III_TRANSCRIPTION_INITIATION_FROM_TYPE_2_PROMOTER	17	-0.511969	-1.3887	0.11002	0.183704	1	6492	tags=76%, list=31%, signal=111%
										REACTOME_DUAL_INCISION_REACTION_IN_TC_NER	23	-0.459918	-1.38555	0.103306	0.185658	1	6278	tags=61%, list=30%, signal=87%
										REACTOME_HEMOSTASIS	255	-0.300351	-1.38173	0.0130354	0.188449	1	2657	tags=20%, list=13%, signal=22%
										REACTOME_TAT_MEDIATED_HIV1_ELONGATION_ARREST_AND_RECOVERY	27	-0.445151	-1.37465	0.0983607	0.194312	1	6319	tags=67%, list=31%, signal=96%
										REACTOME_PYRUVATE_METABOLISM	18	-0.49421	-1.37122	0.11245	0.196582	1	6308	tags=56%, list=30%, signal=80%
										REACTOME_FORMATION_OF_THE_EARLY_ELONGATION_COMPLEX	27	-0.449153	-1.36817	0.0992218	0.198118	1	6319	tags=59%, list=31%, signal=85%
										REACTOME_MRNA_DECAY_BY_5_TO_3_EXORIBONUCLEASE	13	-0.536965	-1.35606	0.124236	0.206971	1	4258	tags=38%, list=21%, signal=48%
										REACTOME_CELL_SURFACE_INTERACTIONS_AT_THE_VASCULAR_WALL	87	-0.340152	-1.35751	0.0419048	0.207061	1	1570	tags=20%, list=8%, signal=21%
										REACTOME_GENERATION_OF_SECOND_MESSENGER_MOLECULES	28	-0.431071	-1.35784	0.0981595	0.208022	1	125	tags=7%, list=1%, signal=7%
										REACTOME_PURINE_RIBONUCLEOSIDE_MONOPHOSPHATE_BIOSYNTHESIS	11	-0.561466	-1.35112	0.133333	0.208051	1	5252	tags=55%, list=25%, signal=73%
										REACTOME_AMINO_ACID_TRANSPORT_ACROSS_THE_PLASMA_MEMBRANE	29	-0.433948	-1.35129	0.10084	0.209252	1	3775	tags=28%, list=18%, signal=34%
										REACTOME_ERKS_ARE_INACTIVATED	10	-0.569374	-1.35133	0.133065	0.210592	1	2392	tags=40%, list=12%, signal=45%
										REACTOME_HIV1_TRANSCRIPTION_ELONGATION	36	-0.413555	-1.34072	0.1125	0.215479	1	6319	tags=58%, list=31%, signal=84%
										REACTOME_METAL_ION_SLC_TRANSPORTERS	23	-0.441717	-1.33812	0.115139	0.215708	1	3096	tags=22%, list=15%, signal=26%
										REACTOME_TRNA_AMINOACYLATION	36	-0.41049	-1.34149	0.114851	0.215911	1	7391	tags=58%, list=36%, signal=91%
										REACTOME_INTEGRATION_OF_ENERGY_METABOLISM	195	-0.30242	-1.33819	0.0311355	0.216972	1	5998	tags=39%, list=29%, signal=54%
										REACTOME_MEMBRANE_TRAFFICKING	74	-0.349473	-1.34152	0.0808081	0.217285	1	7183	tags=45%, list=35%, signal=68%
										REACTOME_METABLISM_OF_NUCLEOTIDES	67	-0.358769	-1.33385	0.102083	0.219087	1	5405	tags=45%, list=26%, signal=60%
										REACTOME_DEATH_RECEPTOR_SIGNALLING	13	-0.516229	-1.32491	0.166008	0.227537	1	1832	tags=31%, list=9%, signal=34%
										REACTOME_CENTROSOME_MATURATION	64	-0.3516	-1.3213	0.0668016	0.230448	1	6263	tags=48%, list=30%, signal=69%
										REACTOME_CELLEXTRACELLULAR_MATRIX_INTERACTIONS	14	-0.497407	-1.31145	0.161034	0.240339	1	886	tags=21%, list=4%, signal=22%
										REACTOME_BASIGIN_INTERACTIONS	23	-0.442972	-1.30589	0.156904	0.2449	1	3818	tags=39%, list=18%, signal=48%

## Sheet: twin pair ID 7
Up-regulated in Twin Pair ID 7 twinA										Up-regulated in Twin Pair ID 7 twinB
Gene Sets Name	Gene Sets Size	Enrichment Score	Normalized Enrichment Score	NOM p-val	FDR q-val	FWER p-val	RANK AT MAX	LEADING EDGE		Gene Sets Name	Gene Sets Size	Enrichment Score	Normalized Enrichment Score	NOM p-val	FDR q-val	FWER p-val	RANK AT MAX	LEADING EDGE
REACTOME_PHASE_1_FUNCTIONALIZATION	14	0.672293	1.7672	0.00603622	0.175374	0.579	2466	tags=50%, list=12%, signal=57%		REACTOME_MYD88_CASCADE	18	-0.686543	-1.94007	0	0.147993	0.119	717	tags=28%, list=3%, signal=29%
REACTOME_NOTCH_HLH_TRANSCRIPTION_PATHWAY	11	0.707652	1.74476	0.0162933	0.178513	0.658	5660	tags=82%, list=27%, signal=113%		REACTOME_TOLL_LIKE_RECEPTOR_9_CASCADE	22	-0.618952	-1.84044	0	0.170317	0.351	717	tags=23%, list=3%, signal=24%
REACTOME_PHASE_1_FUNCTIONALIZATION_OF_COMPOUNDS	64	0.472338	1.79247	0	0.179493	0.48	4244	tags=41%, list=21%, signal=51%		REACTOME_ACTIVATED_TLR4_SIGNALLING	22	-0.629482	-1.87	0	0.175483	0.267	717	tags=23%, list=3%, signal=24%
REACTOME_ENDOGENOUS_STEROLS	14	0.69763	1.82106	0.00377358	0.203836	0.399	236	tags=21%, list=1%, signal=22%		REACTOME_POST_TRANSLATIONAL_PROTEIN_MODIFICATION	38	-0.502643	-1.73859	0.00421941	0.192519	0.744	3615	tags=32%, list=17%, signal=38%
REACTOME_CYTOCHROME_P450_ARRANGED_BY_SUBSTRATE_TYPE	46	0.539543	1.87655	0	0.207579	0.23	4811	tags=46%, list=23%, signal=59%		REACTOME_CELL_CYCLE_MITOTIC	282	-0.369415	-1.74805	0	0.202574	0.711	5633	tags=40%, list=27%, signal=55%
REACTOME_OLFACTORY_SIGNALING_PATHWAY	321	0.355118	1.69373	0	0.243646	0.825	2273	tags=25%, list=11%, signal=28%		REACTOME_S_PHASE	100	-0.438834	-1.79457	0	0.221172	0.529	6526	tags=53%, list=32%, signal=77%
										REACTOME_SYNTHESIS_OF_GPI_ANCHORED_PROTEINS	24	-0.570265	-1.74869	0.00416667	0.234692	0.708	3615	tags=42%, list=17%, signal=50%
										REACTOME_G1_S_TRANSITION	96	-0.404121	-1.64929	0.00613497	0.243246	0.955	5448	tags=42%, list=26%, signal=56%
										REACTOME_CYCLIN_E_ASSOCIATED_EVENTS_DURING_G1_S_TRANSITION_	57	-0.438862	-1.64028	0.00208768	0.245264	0.966	5394	tags=42%, list=26%, signal=57%

## Sheet: twin piar ID 8
Up-regulated in Twin Pair ID 8 twinA										Up-regulated in Twin Pair ID 8 twinB
Gene Sets Name	Gene Sets Size	Enrichment Score	Normalized Enrichment Score	NOM p-val	FDR q-val	FWER p-val	RANK AT MAX	LEADING EDGE		Gene Sets Name	Gene Sets Size	Enrichment Score	Normalized Enrichment Score	NOM p-val	FDR q-val	FWER p-val	RANK AT MAX	LEADING EDGE
n/a										n/a

## Sheet: twin pair ID 9
Up-regulated in Twin Pair ID 9 twinA										Up-regulated in Twin Pair ID 9 twinB
Gene Sets Name	Gene Sets Size	Enrichment Score	Normalized Enrichment Score	NOM p-val	FDR q-val	FWER p-val	RANK AT MAX	LEADING EDGE		Gene Sets Name	Gene Sets Size	Enrichment Score	Normalized Enrichment Score	NOM p-val	FDR q-val	FWER p-val	RANK AT MAX	LEADING EDGE
REACTOME_PROCESSING_OF_CAPPED_INTRON_CONTAINING_PRE_MRNA	129	0.584288	2.49055	0	0	0	6758	tags=72%, list=33%, signal=106%		REACTOME_CELL_CELL_ADHESION_SYSTEMS	54	-0.46328	-1.66201	0.00594059	0.231247	0.975	3245	tags=28%, list=16%, signal=33%
REACTOME_TELOMERE_MAINTENANCE	65	0.653507	2.47154	0	0	0	3898	tags=60%, list=19%, signal=74%		REACTOME_REGULATION_OF_INSULIN_SECRETION_BY_GLUCAGON_LIKE_PEPTIDE_1	57	-0.454278	-1.64603	0.0137795	0.242221	0.985	3564	tags=30%, list=17%, signal=36%
REACTOME_METABOLISM_OF_RNA	89	0.613726	2.46473	0	0	0	5534	tags=67%, list=27%, signal=92%		REACTOME_CASPASE_MEDIATED_CLEAVAGE_OF_CYTOSKELETAL_PROTEINS	11	-0.69353	-1.66417	0.0193798	0.246921	0.973	2567	tags=36%, list=12%, signal=41%
REACTOME_CELL_CYCLE_MITOTIC	282	0.514507	2.4509	0	0	0	5868	tags=58%, list=28%, signal=80%		REACTOME_GLUCAGON_SIGNALING_IN_METABOLIC_REGULATION	31	-0.545869	-1.69908	0.0178571	0.249837	0.94	2295	tags=32%, list=11%, signal=36%
REACTOME_S_PHASE	100	0.596176	2.42514	0	0	0	4689	tags=59%, list=23%, signal=76%
REACTOME_CELL_CYCLE_CHECKPOINTS	101	0.589095	2.41368	0	0	0	5833	tags=66%, list=28%, signal=92%
REACTOME_EXTENSION_OF_TELOMERES	27	0.767146	2.39323	0	0	0	3107	tags=81%, list=15%, signal=96%
REACTOME_MRNA_SPLICING	100	0.566011	2.36898	0	0	0	6758	tags=69%, list=33%, signal=102%
REACTOME_DNA_STRAND_ELONGATION	29	0.73093	2.36719	0	0	0	3107	tags=76%, list=15%, signal=89%
REACTOME_ELONGATION_AND_PROCESSING_OF_CAPPED_TRANSCRIPTS	123	0.553167	2.36504	0	0	0	6798	tags=67%, list=33%, signal=99%
REACTOME_SNRNP_ASSEMBLY	45	0.665455	2.364	0	0	0	5870	tags=84%, list=28%, signal=118%
REACTOME_METABOLISM_OF_CARBOHYDRATES	109	0.568862	2.36135	0	0	0	4650	tags=54%, list=22%, signal=69%
REACTOME_MITOTIC_M_M_G1_PHASES	146	0.534812	2.3264	0	0	0	5588	tags=55%, list=27%, signal=75%
REACTOME_SYNTHESIS_OF_DNA	86	0.584258	2.32564	0	0	0	5552	tags=65%, list=27%, signal=89%
REACTOME_DNA_REPLICATION_PRE_INITIATION	74	0.589646	2.28507	0	0	0	5137	tags=61%, list=25%, signal=81%
REACTOME_TRANSPORT_OF_MATURE_MRNA_DERIVED_FROM_AN_INTRON_CONTAINING_TRANSCRIPT	48	0.628278	2.24307	0	6.72515e-05	0.001	7020	tags=88%, list=34%, signal=132%
REACTOME_G1_S_TRANSITION	96	0.547781	2.25673	0	7.12074e-05	0.001	5137	tags=58%, list=25%, signal=77%
REACTOME_FORMATION_AND_MATURATION_OF_MRNA_TRANSCRIPT	140	0.524032	2.27007	0	7.56579e-05	0.001	6798	tags=63%, list=33%, signal=93%
REACTOME_LAGGING_STRAND_SYNTHESIS	19	0.76347	2.22951	0	0.000128039	0.002	3107	tags=79%, list=15%, signal=93%
REACTOME_ACTIVATION_OF_THE_PRE_REPLICATIVE_COMPLEX	29	0.685552	2.22144	0	0.000177364	0.003	5137	tags=86%, list=25%, signal=115%
REACTOME_M_G1_TRANSITION	60	0.59871	2.21611	0	0.00022856	0.004	6937	tags=75%, list=34%, signal=112%
REACTOME_DNA_REPAIR	92	0.539861	2.17095	0	0.000456819	0.01	4551	tags=51%, list=22%, signal=65%
REACTOME_ELECTRON_TRANSPORT_CHAIN	57	0.584438	2.15658	0	0.000466412	0.011	5757	tags=58%, list=28%, signal=80%
REACTOME_LATE_PHASE_OF_HIV_LIFE_CYCLE	82	0.553409	2.18222	0	0.000475092	0.01	6798	tags=68%, list=33%, signal=101%
REACTOME_TRANSCRIPTION	171	0.489807	2.15209	0	0.000477911	0.012	7001	tags=63%, list=34%, signal=95%
REACTOME_NUCLEAR_IMPORT_OF_REV_PROTEIN	28	0.683518	2.15789	0	0.000483687	0.011	4998	tags=79%, list=24%, signal=103%
REACTOME_TRANSPORT_OF_THE_SLBP_INDEPENDENT_MATURE_MRNA	30	0.660731	2.1544	0	0.000494391	0.012	5186	tags=77%, list=25%, signal=102%
REACTOME_REV_MEDIATED_NUCLEAR_EXPORT_OF_HIV1_RNA	29	0.684948	2.18246	0	0.000494888	0.01	4998	tags=79%, list=24%, signal=104%
REACTOME_TRNA_AMINOACYLATION	36	0.633239	2.14581	0	0.000498767	0.013	5376	tags=72%, list=26%, signal=97%
REACTOME_ACTIVATION_OF_ATR_IN_RESPONSE_TO_REPLICATION_STRESS	33	0.667286	2.18366	0	0.000516404	0.01	5539	tags=85%, list=27%, signal=116%
REACTOME_G2_M_CHECKPOINTS	37	0.647519	2.18877	0	0.000539877	0.01	5539	tags=81%, list=27%, signal=111%
REACTOME_VPR_MEDIATED_NUCLEAR_IMPORT_OF_PICS	29	0.658018	2.12324	0	0.000852814	0.024	4998	tags=72%, list=24%, signal=95%
REACTOME_REGULATION_OF_GLUCOKINASE_BY_GLUCOKINASE_REGULATORY_PROTEIN	27	0.665905	2.12528	0	0.000879464	0.024	6369	tags=89%, list=31%, signal=128%
REACTOME_CDT1_ASSOCIATION_WITH_THE_CDC6_ORC_ORIGIN_COMPLEX	51	0.58014	2.11468	0	0.00100294	0.028	6937	tags=71%, list=34%, signal=106%
REACTOME_NEP_NS2_INTERACTS_WITH_THE_CELLULAR_EXPORT_MACHINERY	27	0.676683	2.11362	0.0020202	0.00100791	0.029	4998	tags=78%, list=24%, signal=102%
REACTOME_FORMATION_OF_TUBULIN_FOLDING_INTERMEDIATES_BY_CCT_TRIC	20	0.701027	2.09483	0	0.0010778	0.032	2556	tags=55%, list=12%, signal=63%
REACTOME_MRNA_SPLICING_MINOR_PATHWAY	40	0.605047	2.07922	0	0.0012449	0.037	5858	tags=70%, list=28%, signal=97%
REACTOME_GENE_EXPRESSION	383	0.428164	2.07696	0	0.00127504	0.039	6808	tags=52%, list=33%, signal=77%
REACTOME_HIV_LIFE_CYCLE	95	0.508191	2.0757	0	0.0013016	0.041	6798	tags=65%, list=33%, signal=97%
REACTOME_RNA_POLYMERASE_II_TRANSCRIPTION	85	0.513817	2.05493	0	0.00183125	0.059	7575	tags=71%, list=37%, signal=111%
REACTOME_ORC1_REMOVAL_FROM_CHROMATIN	62	0.542771	2.0451	0	0.00188716	0.064	6937	tags=71%, list=34%, signal=106%
REACTOME_PREFOLDIN_MEDIATED_TRANSFER_OF_SUBSTRATE_TO_CCT_TRIC	26	0.647871	2.04954	0	0.00190488	0.063	3348	tags=54%, list=16%, signal=64%
REACTOME_RNA_POLYMERASE_I_III_AND_MITOCHONDRIAL_TRANSCRIPTION	99	0.499099	2.03918	0	0.00195304	0.068	5634	tags=55%, list=27%, signal=75%
REACTOME_TRANSPORT_OF_RIBONUCLEOPROTEINS_INTO_THE_HOST_NUCLEUS	27	0.659189	2.03362	0.00197239	0.00198746	0.07	4998	tags=74%, list=24%, signal=98%
REACTOME_INFLUENZA_LIFE_CYCLE	122	0.473905	1.9989	0	0.00274463	0.108	6506	tags=50%, list=31%, signal=72%
REACTOME_AUTODEGRADATION_OF_CDH1_BY_CDH1_APC	55	0.539441	2.00734	0	0.0027452	0.101	8319	tags=82%, list=40%, signal=136%
REACTOME_MITOTIC_PROMETAPHASE	83	0.500187	2.00005	0	0.00275272	0.106	5399	tags=51%, list=26%, signal=68%
REACTOME_POLYMERASE_SWITCHING	13	0.754502	2.01303	0	0.0027576	0.098	3107	tags=85%, list=15%, signal=100%
REACTOME_REGULATION_OF_APC_ACTIVATORS_BETWEEN_G1_S_AND_EARLY_ANAPHASE	67	0.526085	2.00738	0	0.00280488	0.101	6937	tags=69%, list=34%, signal=103%
REACTOME_CDC20_PHOSPHO_APC_MEDIATED_DEGRADATION_OF_CYCLIN_A	59	0.535787	2.00048	0	0.00281007	0.106	6937	tags=69%, list=34%, signal=104%
REACTOME_GLUCOSE_TRANSPORT	36	0.601247	1.99503	0	0.00283064	0.113	6369	tags=78%, list=31%, signal=112%
REACTOME_P53_INDEPENDENT_DNA_DAMAGE_RESPONSE	42	0.569015	1.9846	0	0.00309887	0.126	8319	tags=83%, list=40%, signal=139%
REACTOME_REPAIR_SYNTHESIS_OF_PATCH_27_30_BASES_LONG_BY_DNA_POLYMERASE	14	0.744544	1.96435	0	0.00336428	0.147	2830	tags=71%, list=14%, signal=83%
REACTOME_MRNA_3_END_PROCESSING	33	0.596345	1.96926	0.00199203	0.00342434	0.141	7575	tags=85%, list=37%, signal=134%
REACTOME_NUCLEOTIDE_EXCISION_REPAIR	43	0.564197	1.96478	0	0.00342545	0.147	6180	tags=70%, list=30%, signal=99%
REACTOME_HIV_INFECTION	172	0.440646	1.96292	0	0.00342715	0.152	7788	tags=68%, list=38%, signal=108%
REACTOME_REGULATION_OF_ORNITHINE_DECARBOXYLASE	46	0.542903	1.9657	0.0020202	0.00344752	0.145	8319	tags=78%, list=40%, signal=131%
REACTOME_TRANSCRIPTION_COUPLED_NER	38	0.576744	1.96008	0.00200401	0.00357718	0.162	4469	tags=58%, list=22%, signal=74%
REACTOME_VIF_MEDIATED_DEGRADATION_OF_APOBEC3G	45	0.562414	1.95524	0	0.00368031	0.17	8319	tags=80%, list=40%, signal=133%
REACTOME_PURINE_RIBONUCLEOSIDE_MONOPHOSPHATE_BIOSYNTHESIS	11	0.780181	1.94739	0.0019084	0.00403059	0.188	2329	tags=73%, list=11%, signal=82%
REACTOME_RNA_POLYMERASE_I_PROMOTER_CLEARANCE	64	0.51367	1.94518	0	0.00404353	0.191	5607	tags=55%, list=27%, signal=75%
REACTOME_REMOVAL_OF_THE_FLAP_INTERMEDIATE	13	0.754129	1.94151	0	0.00407268	0.195	3107	tags=77%, list=15%, signal=90%
REACTOME_STABILIZATION_OF_P53	44	0.550335	1.91337	0.00204082	0.00517082	0.238	8319	tags=80%, list=40%, signal=133%
REACTOME_SCF_BETA_TRCP_MEDIATED_DEGRADATION_OF_EMI1	47	0.527727	1.90256	0.00204499	0.00571757	0.263	8319	tags=79%, list=40%, signal=131%
REACTOME_PACKAGING_OF_TELOMERE_ENDS	38	0.557561	1.89705	0	0.00579872	0.279	5607	tags=55%, list=27%, signal=76%
REACTOME_GLOBAL_GENOMIC_NER	29	0.597996	1.89826	0.00202429	0.0058325	0.276	2943	tags=48%, list=14%, signal=56%
REACTOME_CYCLIN_E_ASSOCIATED_EVENTS_DURING_G1_S_TRANSITION_	57	0.512429	1.89895	0	0.00588566	0.275	7592	tags=72%, list=37%, signal=113%
REACTOME_CLASSICAL_ANTIBODY_MEDIATED_COMPLEMENT_ACTIVATION	9	0.810215	1.88842	0	0.00630549	0.306	171	tags=22%, list=1%, signal=22%
REACTOME_SCF_SKP2_MEDIATED_DEGRADATION_OF_P27_P21	51	0.524915	1.87954	0	0.00655748	0.317	8319	tags=82%, list=40%, signal=137%
REACTOME_METABOLISM_OF_MRNA	44	0.536486	1.87584	0.00200401	0.00662946	0.324	5477	tags=55%, list=26%, signal=74%
REACTOME_INACTIVATION_OF_APC_VIA_DIRECT_INHIBITION_OF_THE_APCOMPLEX	16	0.664814	1.87026	0.00197239	0.00690997	0.339	5833	tags=88%, list=28%, signal=122%
REACTOME_INITIAL_TRIGGERING_OF_COMPLEMENT	15	0.68773	1.86205	0	0.0074221	0.365	927	tags=20%, list=4%, signal=21%
REACTOME_E2F_MEDIATED_REGULATION_OF_DNA_REPLICATION	28	0.581736	1.8562	0	0.00776469	0.387	4837	tags=71%, list=23%, signal=93%
REACTOME_ASSOCIATION_OF_LICENSING_FACTORS_WITH_THE_PREREPLICATIVE_COMPLEX	12	0.721764	1.83598	0.00377358	0.00931919	0.445	2912	tags=67%, list=14%, signal=78%
REACTOME_HOST_INTERACTIONS_OF_HIV_FACTORS	115	0.435562	1.83138	0	0.00978408	0.464	5051	tags=47%, list=24%, signal=62%
REACTOME_METABLISM_OF_NUCLEOTIDES	67	0.466829	1.82761	0.00201613	0.00983717	0.473	3303	tags=42%, list=16%, signal=50%
REACTOME_MICRORNA_BIOGENESIS	17	0.664426	1.82474	0.00622407	0.00984685	0.478	5738	tags=82%, list=28%, signal=114%
REACTOME_DEADENYLATION_OF_MRNA	22	0.614924	1.81399	0	0.00988982	0.509	5477	tags=50%, list=26%, signal=68%
REACTOME_RNA_POLYMERASE_I_PROMOTER_OPENING	44	0.528952	1.82766	0	0.00996661	0.473	3898	tags=45%, list=19%, signal=56%
REACTOME_UNWINDING_OF_DNA	10	0.752067	1.81433	0.00189753	0.00997794	0.508	5137	tags=100%, list=25%, signal=133%
REACTOME_GLUCOSE_METABOLISM	53	0.500556	1.81858	0.00210084	0.00997818	0.496	5303	tags=47%, list=26%, signal=63%
REACTOME_CYTOSOLIC_TRNA_AMINOACYLATION	21	0.623228	1.82009	0.00988142	0.0100151	0.493	4951	tags=67%, list=24%, signal=88%
REACTOME_RNA_POLYMERASE_I_CHAIN_ELONGATION	28	0.571832	1.81523	0.00595238	0.0100851	0.508	4355	tags=54%, list=21%, signal=68%
REACTOME_VITAMIN_B5_(PANTOTHENATE)_METABOLISM	11	0.723962	1.82071	0.00630252	0.0101112	0.492	3292	tags=55%, list=16%, signal=65%
REACTOME_COMPLEMENT_CASCADE	22	0.600269	1.81559	0.00193798	0.0101642	0.507	1117	tags=18%, list=5%, signal=19%
REACTOME_FORMATION_OF_THE_EARLY_ELONGATION_COMPLEX	27	0.567458	1.80164	0.00606061	0.0109973	0.555	6798	tags=70%, list=33%, signal=105%
REACTOME_MITOCHONDRIAL_TRNA_AMINOACYLATION	18	0.625491	1.79729	0.0060241	0.0114974	0.576	5376	tags=72%, list=26%, signal=97%
REACTOME_CDC6_ASSOCIATION_WITH_THE_ORC:ORIGIN_COMPLEX	11	0.706798	1.78889	0	0.011899	0.597	6074	tags=100%, list=29%, signal=141%
REACTOME_MTORC1_MEDIATED_SIGNALLING	11	0.725654	1.79022	0.00558659	0.0119274	0.594	4693	tags=82%, list=23%, signal=106%
REACTOME_HIV1_TRANSCRIPTION_ELONGATION	36	0.545228	1.79124	0	0.0119687	0.591	6798	tags=67%, list=33%, signal=99%
REACTOME_TRANSLATION	106	0.429466	1.78036	0	0.0127333	0.626	7859	tags=54%, list=38%, signal=86%
REACTOME_APCDC20_MEDIATED_DEGRADATION_OF_CYCLIN_B	16	0.639879	1.76303	0.0105042	0.0147145	0.672	5833	tags=81%, list=28%, signal=113%
REACTOME_REMOVAL_OF_THE_FLAP_INTERMEDIATE_FROM_THE_C_STRAND	9	0.74634	1.73913	0.00753296	0.0176719	0.738	2339	tags=67%, list=11%, signal=75%
REACTOME_E2F_TRANSCRIPTIONAL_TARGETS_AT_G1_S	17	0.598486	1.7371	0.00835073	0.0177914	0.746	2472	tags=53%, list=12%, signal=60%
REACTOME_TRANSCRIPTION_OF_THE_HIV_GENOME	53	0.475214	1.72204	0.00829876	0.0194601	0.788	7711	tags=66%, list=37%, signal=105%
REACTOME_RNA_POLYMERASE_I_PROMOTER_ESCAPE	18	0.595538	1.72205	0.0117878	0.0196607	0.788	6598	tags=72%, list=32%, signal=106%
REACTOME_MRNA_DECAY_BY_3_TO_5_EXORIBONUCLEASE	9	0.725653	1.71681	0.0136452	0.0198103	0.8	1836	tags=56%, list=9%, signal=61%
REACTOME_PHOSPHORYLATION_OF_THE_APC	15	0.65814	1.72205	0.00779727	0.0198655	0.788	5833	tags=87%, list=28%, signal=121%
REACTOME_GLYCOLYSIS	20	0.594017	1.71754	0.0059761	0.0199144	0.799	3457	tags=35%, list=17%, signal=42%
REACTOME_CHOLESTEROL_BIOSYNTHESIS	19	0.606933	1.72281	0.00198807	0.0199504	0.788	6616	tags=79%, list=32%, signal=116%
REACTOME_DOUBLE_STRAND_BREAK_REPAIR	20	0.594574	1.71482	0.00598802	0.0199604	0.808	3819	tags=55%, list=18%, signal=67%
REACTOME_E2F_ENABLED_INHIBITION_OF_PRE_REPLICATION_COMPLEX_FORMATION	9	0.732595	1.71167	0.0179641	0.0204267	0.812	5539	tags=100%, list=27%, signal=136%
REACTOME_CONVERSION_FROM_APC_CDC20_TO_APC_CDH1_IN_LATE_ANAPHASE	16	0.618224	1.70529	0.0157791	0.0211388	0.826	5833	tags=75%, list=28%, signal=104%
REACTOME_TAT_MEDIATED_HIV1_ELONGATION_ARREST_AND_RECOVERY	27	0.536851	1.70534	0.00998004	0.021344	0.826	7926	tags=74%, list=38%, signal=120%
REACTOME_RNA_POLYMERASE_III_TRANSCRIPTION_INITIATION_FROM_TYPE_2_PROMOTER	17	0.595704	1.70121	0.024952	0.02176	0.846	6054	tags=76%, list=29%, signal=108%
REACTOME_FANCONI_ANEMIA_PATHWAY	14	0.637236	1.69882	0.0247934	0.0219129	0.848	3768	tags=50%, list=18%, signal=61%
REACTOME_ABORTIVE_ELONGATION_OF_HIV1_TRANSCRIPT_IN_THE_ABSENCE_OF_TAT	20	0.582337	1.69429	0.0093985	0.0223226	0.856	6798	tags=70%, list=33%, signal=104%
REACTOME_MTOR_SIGNALLING	27	0.539704	1.69126	0.0103734	0.0227242	0.864	6345	tags=67%, list=31%, signal=96%
REACTOME_RNA_POL_II_CTD_PHOSPHORYLATION_AND_INTERACTION_WITH_CE	23	0.563453	1.68551	0.010661	0.0236538	0.882	6598	tags=70%, list=32%, signal=102%
REACTOME_HOMOLOGOUS_RECOMBINATION_REPAIR	14	0.633028	1.68047	0.0104822	0.0244732	0.897	3583	tags=57%, list=17%, signal=69%
REACTOME_APOPTOSIS_INDUCED_DNA_FRAGMENTATION	11	0.672892	1.67552	0.0125523	0.0252504	0.906	3073	tags=45%, list=15%, signal=53%
REACTOME_TRANSLATION_INITIATION_COMPLEX_FORMATION	50	0.454724	1.67237	0.0019084	0.0255208	0.913	8839	tags=66%, list=43%, signal=115%
REACTOME_SIGNALING_BY_WNT	56	0.44692	1.66558	0.0102041	0.0268986	0.921	8319	tags=70%, list=40%, signal=116%
REACTOME_RNA_POLYMERASE_III_TRANSCRIPTION_INITIATION	26	0.534313	1.66374	0.0208729	0.027057	0.927	6054	tags=62%, list=29%, signal=87%
REACTOME_TRANSFORMATION_OF_LANOSTEROL_TO_CHOLESTEROL	9	0.694926	1.66244	0.0213592	0.0271233	0.928	6058	tags=78%, list=29%, signal=110%
REACTOME_GLUCOSE_REGULATION_OF_INSULIN_SECRETION	133	0.380588	1.64307	0.00221239	0.0312729	0.958	5759	tags=45%, list=28%, signal=62%
REACTOME_DUAL_INCISION_REACTION_IN_TC_NER	23	0.531486	1.63355	0.0290456	0.0333391	0.965	7711	tags=83%, list=37%, signal=132%
REACTOME_RNA_POLYMERASE_III_TRANSCRIPTION_INITIATION_FROM_TYPE_3_PROMOTER	20	0.558861	1.62924	0.0218688	0.0342515	0.967	4550	tags=55%, list=22%, signal=70%
REACTOME_CYCLIN_A1_ASSOCIATED_EVENTS_DURING_G2_M_TRANSITION	13	0.632503	1.62717	0.0233463	0.0344648	0.968	3484	tags=54%, list=17%, signal=65%
REACTOME_RNA_POLYMERASE_I_TRANSCRIPTION_TERMINATION	19	0.563585	1.61937	0.0180723	0.0362287	0.977	6598	tags=68%, list=32%, signal=100%
REACTOME_G2_M_TRANSITION	75	0.412634	1.60882	0.00595238	0.0386513	0.982	7184	tags=60%, list=35%, signal=92%
REACTOME_GTP_HYDROLYSIS_AND_JOINING_OF_THE_60S_RIBOSOMAL_SUBUNIT	93	0.397364	1.60755	0.00408163	0.0386664	0.983	7859	tags=52%, list=38%, signal=83%
REACTOME_VIRAL_MESSENGER_RNA_SYNTHESIS	13	0.614911	1.59981	0.0232068	0.0405234	0.987	5634	tags=69%, list=27%, signal=95%
REACTOME_BASE_EXCISION_REPAIR	17	0.580375	1.59692	0.0211132	0.0412361	0.988	3110	tags=53%, list=15%, signal=62%
REACTOME_INFLUENZA_VIRAL_RNA_TRANSCRIPTION_AND_REPLICATION	89	0.396387	1.58	0	0.0464495	0.994	7926	tags=53%, list=38%, signal=85%
REACTOME_RNA_POLYMERASE_I_TRANSCRIPTION_INITIATION	21	0.536312	1.5736	0.0247423	0.0484754	0.995	6598	tags=67%, list=32%, signal=98%
REACTOME_METABOLISM_OF_PROTEINS	194	0.346562	1.56449	0	0.0508879	0.998	6655	tags=41%, list=32%, signal=60%
REACTOME_MRNA_PROCESSING	29	0.48631	1.56529	0.03	0.0510164	0.997	6598	tags=62%, list=32%, signal=91%
REACTOME_RNA_POLYMERASE_III_TRANSCRIPTION	31	0.481636	1.55289	0.0336842	0.0548246	0.999	6158	tags=61%, list=30%, signal=87%
REACTOME_CHAPERONIN_MEDIATED_PROTEIN_FOLDING	46	0.440087	1.54614	0.0102881	0.0570929	0.999	3388	tags=37%, list=16%, signal=44%
REACTOME_GLYCOGEN_BREAKDOWN_GLYCOGENOLYSIS	15	0.560777	1.54199	0.0349076	0.0581199	0.999	5723	tags=53%, list=28%, signal=74%
REACTOME_G1_PHASE	16	0.557648	1.53553	0.0480769	0.0603887	1	4837	tags=56%, list=23%, signal=73%
REACTOME_PURINE_METABOLISM	29	0.473009	1.51668	0.0410678	0.0681167	1	3303	tags=45%, list=16%, signal=53%
REACTOME_GLUCONEOGENESIS	30	0.470559	1.50427	0.0456349	0.0735237	1	5077	tags=47%, list=25%, signal=62%
REACTOME_SYNTHESIS_AND_INTERCONVERSION_OF_NUCLEOTIDE_DI_AND_TRIPHOSPHATES	16	0.543913	1.49919	0.038	0.0756988	1	4256	tags=63%, list=21%, signal=79%
REACTOME_METABOLISM_OF_AMINO_ACIDS	154	0.339372	1.48867	0.00428265	0.0807196	1	4977	tags=40%, list=24%, signal=53%
REACTOME_FORMATION_OF_THE_TERNARY_COMPLEX_AND_SUBSEQUENTLY_THE_43S_COMPLEX	43	0.41599	1.48316	0.026694	0.0831636	1	8839	tags=60%, list=43%, signal=105%
REACTOME_REMOVAL_OF_DNA_PATCH_CONTAINING_ABASIC_RESIDUE	14	0.554057	1.48044	0.0483871	0.0838991	1	4141	tags=57%, list=20%, signal=71%
REACTOME_HIV1_TRANSCRIPTION_INITIATION	35	0.452487	1.47823	0.0283976	0.0841389	1	7926	tags=69%, list=38%, signal=111%
REACTOME_CENTROSOME_MATURATION	64	0.396066	1.47309	0.0279441	0.0863645	1	7184	tags=61%, list=35%, signal=93%
REACTOME_FORMATION_OF_ATP_BY_CHEMIOSMOTIC_COUPLING	11	0.571416	1.46978	0.063745	0.0872674	1	8760	tags=91%, list=42%, signal=158%
REACTOME_METABOLISM_OF_VITAMINS_AND_COFACTORS	40	0.424902	1.46214	0.0346939	0.0909154	1	4146	tags=38%, list=20%, signal=47%
REACTOME_THROMBIN_SIGNALLING_THROUGH_PROTEINASE_ACTIVATED_RECEPTORS	25	0.473176	1.45982	0.0508806	0.0916165	1	2880	tags=36%, list=14%, signal=42%
REACTOME_PEPTIDE_CHAIN_ELONGATION	74	0.375328	1.455	0.030426	0.0940669	1	7859	tags=47%, list=38%, signal=76%
REACTOME_LOSS_OF_NLP_FROM_MITOTIC_CENTROSOMES	56	0.391115	1.44938	0.0168421	0.0960503	1	7184	tags=61%, list=35%, signal=93%
REACTOME_THROMBOXANE_SIGNALLING_THROUGH_TP_RECEPTOR	21	0.482907	1.44946	0.0621118	0.0966873	1	2880	tags=33%, list=14%, signal=39%
REACTOME_RNA_POLYMERASE_III_CHAIN_ELONGATION	10	0.600434	1.42768	0.0823755	0.107609	1	5634	tags=80%, list=27%, signal=110%
REACTOME_FORMATION_OF_A_POOL_OF_FREE_40S_SUBUNITS	82	0.355929	1.42786	0.0251046	0.108252	1	7859	tags=46%, list=38%, signal=74%
REACTOME_AMINO_ACID_SYNTHESIS_AND_INTERCONVERSION	12	0.555402	1.42138	0.0912621	0.11026	1	2683	tags=42%, list=13%, signal=48%
REACTOME_PEROXISOMAL_LIPID_METABOLISM	19	0.491458	1.42259	0.0927022	0.110272	1	5251	tags=47%, list=25%, signal=63%
REACTOME_REGULATION_OF_AMPK_ACTIVITY_VIA_LKB1	14	0.538234	1.41229	0.0992218	0.11547	1	6033	tags=57%, list=29%, signal=81%
REACTOME_RECRUITMENT_OF_NUMA_TO_MITOTIC_CENTROSOMES	10	0.592994	1.41115	0.106122	0.115628	1	4026	tags=60%, list=19%, signal=74%
REACTOME_BRANCHED_CHAIN_AMINO_ACID_CATABOLISM	16	0.509732	1.40353	0.0776515	0.119944	1	4762	tags=50%, list=23%, signal=65%
REACTOME_INTEGRATION_OF_ENERGY_METABOLISM	195	0.305184	1.38027	0.010352	0.136271	1	5759	tags=41%, list=28%, signal=56%
REACTOME_CITRIC_ACID_CYCLE	17	0.483959	1.37348	0.104208	0.140442	1	7757	tags=71%, list=37%, signal=113%
REACTOME_REGULATION_OF_INSULIN_SECRETION	181	0.30003	1.34934	0.0238612	0.159632	1	5781	tags=40%, list=28%, signal=55%
REACTOME_VIRAL_MRNA_TRANSLATION	74	0.345287	1.34676	0.063655	0.160974	1	7859	tags=46%, list=38%, signal=74%
REACTOME_DUAL_INCISION_REACTION_IN_GG_NER	17	0.487844	1.33439	0.12831	0.17097	1	6598	tags=59%, list=32%, signal=86%
REACTOME_POST_CHAPERONIN_TUBULIN_FOLDING_PATHWAY	16	0.474325	1.32996	0.140039	0.173742	1	2842	tags=31%, list=14%, signal=36%
REACTOME_RNA_POLYMERASE_III_TRANSCRIPTION_TERMINATION	15	0.481958	1.30257	0.156069	0.198215	1	4550	tags=60%, list=22%, signal=77%
REACTOME_G_BETA_GAMMA_SIGNALLING_THROUGH_PI3KGAMMA	23	0.42843	1.28347	0.143145	0.2167	1	2888	tags=30%, list=14%, signal=35%
REACTOME_ASSOCIATION_OF_TRIC_CCT_WITH_TARGET_PROTEINS_DURING_BIOSYNTHESIS	27	0.399122	1.26682	0.165067	0.233867	1	3388	tags=37%, list=16%, signal=44%
REACTOME_EFFECTS_OF_PIP2_HYDROLYSIS	15	0.470395	1.25543	0.189621	0.245895	1	4172	tags=40%, list=20%, signal=50%

## Sheet: twin pair ID 10
Up-regulated in Twin Pair ID 10 twinA										Up-regulated in Twin Pair ID 10 twinB
Gene Sets Name	Gene Sets Size	Enrichment Score	Normalized Enrichment Score	NOM p-val	FDR q-val	FWER p-val	RANK AT MAX	LEADING EDGE		Gene Sets Name	Gene Sets Size	Enrichment Score	Normalized Enrichment Score	NOM p-val	FDR q-val	FWER p-val	RANK AT MAX	LEADING EDGE
REACTOME_FORMATION_OF_A_POOL_OF_FREE_40S_SUBUNITS	82	0.651801	2.66682	0	0	0	4683	tags=60%, list=23%, signal=77%		REACTOME_INITIAL_TRIGGERING_OF_COMPLEMENT	15	-0.738099	-2.00544	0	0.0447574	0.113	2	tags=7%, list=0%, signal=7%
REACTOME_VIRAL_MRNA_TRANSLATION	74	0.676314	2.6653	0	0	0	4683	tags=64%, list=23%, signal=82%		REACTOME_COMPLEMENT_CASCADE	22	-0.669732	-2.0528	0	0.0499498	0.065	1117	tags=14%, list=5%, signal=14%
REACTOME_PEPTIDE_CHAIN_ELONGATION	74	0.678503	2.65691	0	0	0	4683	tags=64%, list=23%, signal=82%		REACTOME_CLASSICAL_ANTIBODY_MEDIATED_COMPLEMENT_ACTIVATION	9	-0.792044	-1.8374	0	0.161458	0.465	1117	tags=22%, list=5%, signal=23%
REACTOME_INFLUENZA_VIRAL_RNA_TRANSCRIPTION_AND_REPLICATION	89	0.635527	2.56966	0	0	0	4683	tags=60%, list=23%, signal=77%
REACTOME_TRANSLATION	106	0.589008	2.49344	0	0	0	4683	tags=52%, list=23%, signal=67%
REACTOME_GTP_HYDROLYSIS_AND_JOINING_OF_THE_60S_RIBOSOMAL_SUBUNIT	93	0.602042	2.47539	0	0	0	4683	tags=54%, list=23%, signal=69%
REACTOME_INSULIN_SYNTHESIS_AND_SECRETION	115	0.539629	2.31293	0	0	0	3453	tags=42%, list=17%, signal=50%
REACTOME_REGULATION_OF_GENE_EXPRESSION_IN_BETA_CELLS	90	0.564657	2.2997	0	0	0	4683	tags=52%, list=23%, signal=67%
REACTOME_GLUCOSE_REGULATION_OF_INSULIN_SECRETION	133	0.49782	2.16467	0	9.06354e-05	0.001	4074	tags=41%, list=20%, signal=51%
REACTOME_FORMATION_OF_THE_TERNARY_COMPLEX_AND_SUBSEQUENTLY_THE_43S_COMPLEX	43	0.61498	2.20089	0	9.81884e-05	0.001	3453	tags=49%, list=17%, signal=58%
REACTOME_REGULATION_OF_BETA_CELL_DEVELOPMENT	102	0.529084	2.22036	0	0.000107115	0.001	4683	tags=50%, list=23%, signal=64%
REACTOME_INFLUENZA_LIFE_CYCLE	122	0.524976	2.23941	0	0.000117826	0.001	4683	tags=48%, list=23%, signal=62%
REACTOME_DIABETES_PATHWAYS	334	0.459711	2.25277	0	0.000130918	0.001	3960	tags=37%, list=19%, signal=44%
REACTOME_ELECTRON_TRANSPORT_CHAIN	57	0.570782	2.10477	0	0.000259094	0.003	4963	tags=58%, list=24%, signal=76%
REACTOME_METABOLISM_OF_PROTEINS	194	0.452643	2.07608	0	0.000463858	0.006	4813	tags=42%, list=23%, signal=55%
REACTOME_TRANSLATION_INITIATION_COMPLEX_FORMATION	50	0.577892	2.08899	0	0.000494781	0.006	3453	tags=44%, list=17%, signal=53%
REACTOME_INTEGRATION_OF_ENERGY_METABOLISM	195	0.436591	2.011	0	0.0022471	0.031	3960	tags=36%, list=19%, signal=45%
REACTOME_REGULATION_OF_INSULIN_SECRETION	181	0.439938	1.98772	0	0.0035587	0.051	3960	tags=34%, list=19%, signal=42%
REACTOME_CITRIC_ACID_CYCLE	17	0.669297	1.93195	0.00198807	0.0088717	0.133	3517	tags=59%, list=17%, signal=71%
REACTOME_THE_ROLE_OF_NEF_IN_HIV1_REPLICATION_AND_DISEASE_PATHOGENESIS	28	0.598625	1.87756	0.00185529	0.0165346	0.229	3726	tags=54%, list=18%, signal=65%
REACTOME_GLUCONEOGENESIS	30	0.567715	1.83689	0	0.0257672	0.351	3557	tags=47%, list=17%, signal=56%
REACTOME_GLUCOSE_METABOLISM	53	0.480079	1.79169	0	0.0385056	0.488	4747	tags=45%, list=23%, signal=59%
REACTOME_BRANCHED_CHAIN_AMINO_ACID_CATABOLISM	16	0.637559	1.78251	0.00616016	0.0406666	0.519	1331	tags=38%, list=6%, signal=40%
REACTOME_GLYCOLYSIS	20	0.578832	1.75159	0.00583658	0.0544328	0.646	3250	tags=40%, list=16%, signal=47%
REACTOME_NEF_MEDIATES_DOWN_MODULATION_OF_CELL_SURFACE_RECEPTORS_BY_RECRUITING_THEM_TO_CLATHRIN_ADAPTERS	21	0.592195	1.73345	0.00392927	0.0605186	0.722	3726	tags=57%, list=18%, signal=70%
REACTOME_METABOLISM_OF_AMINO_ACIDS	154	0.387628	1.73592	0	0.0611489	0.71	6425	tags=49%, list=31%, signal=70%
REACTOME_PP2A_MEDIATED_DEPHOSPHORYLATION_OF_KEY_METABOLIC_FACTORS	9	0.738416	1.716	0.0157791	0.0689729	0.774	2713	tags=67%, list=13%, signal=77%
REACTOME_METABOLISM_OF_CARBOHYDRATES	109	0.396255	1.66332	0	0.106294	0.907	3774	tags=31%, list=18%, signal=38%
REACTOME_BETACATENIN_PHOSPHORYLATION_CASCADE	12	0.643513	1.63833	0.0281125	0.122961	0.951	2397	tags=42%, list=12%, signal=47%
REACTOME_SIGNALING_BY_WNT	56	0.436797	1.64165	0.00784314	0.124055	0.944	6336	tags=57%, list=31%, signal=82%
REACTOME_EICOSANOID_LIGAND_BINDING_RECEPTORS	13	0.596551	1.58779	0.028169	0.162729	0.991	3455	tags=38%, list=17%, signal=46%
REACTOME_ASSOCIATION_OF_TRIC_CCT_WITH_TARGET_PROTEINS_DURING_BIOSYNTHESIS	27	0.494946	1.59859	0.00798403	0.163293	0.986	7136	tags=67%, list=34%, signal=102%
REACTOME_TOLL_LIKE_RECEPTOR_4_CASCADE	26	0.512789	1.59214	0.0228571	0.16714	0.989	515	tags=19%, list=2%, signal=20%
REACTOME_GENE_EXPRESSION	383	0.318987	1.58794	0	0.167547	0.991	3551	tags=26%, list=17%, signal=31%
REACTOME_CHAPERONIN_MEDIATED_PROTEIN_FOLDING	46	0.438993	1.57595	0.0141988	0.172857	0.994	5582	tags=46%, list=27%, signal=62%
REACTOME_HIV_INFECTION	172	0.342142	1.55878	0.00184162	0.190363	0.996	3763	tags=30%, list=18%, signal=37%
REACTOME_HOST_INTERACTIONS_OF_HIV_FACTORS	115	0.368378	1.55478	0.0019084	0.190714	0.996	5279	tags=40%, list=26%, signal=53%
REACTOME_PURINE_SALVAGE_REACTIONS	11	0.616419	1.51576	0.0453649	0.237267	1	3194	tags=45%, list=15%, signal=54%
REACTOME_REMOVAL_OF_THE_FLAP_INTERMEDIATE_FROM_THE_C_STRAND	9	0.64612	1.51907	0.045082	0.238146	1	3295	tags=56%, list=16%, signal=66%
REACTOME_PYRUVATE_METABOLISM_AND_TCA_CYCLE	34	0.454023	1.5112	0.0232558	0.238319	1	3517	tags=35%, list=17%, signal=42%
REACTOME_DARPP32_EVENTS	24	0.47926	1.50527	0.0427184	0.242431	1	4663	tags=46%, list=23%, signal=59%

[truncated: 7 more sheets: twin piar ID 11, twin pair ID 12, twin pair ID 13, twin pair ID 14, twin pair ID 15, twin pair ID 16, twin pair ID 17]
